# Supplementary material for: Elagolix Sodium Salt and Its Synthetic Intermediates: A Spectroscopic, Crystallographic, and Conformational Study
Source: MDPI journal article supplement (doi:10.3390/molecules28093861), 2023-05-03
Supplement: s1 [file s1]

# Elagolix Sodium Salt and Its Synthetic Intermediates: A Spec-troscopic, Crystallographic, and Conformational Study

Samuele Ciceri <sup>1,2</sup>, Diego Colombo <sup>2</sup>, Enrico M. A. Fassi <sup>1</sup>, Patrizia Ferraboschi <sup>2</sup>, Giovanni Grazioso <sup>1</sup>, Paride Grisenti <sup>3</sup>, Marco Iannone <sup>4</sup>, Carlo Castellano <sup>5</sup> and Fiorella Meneghetti <sup>1,\*</sup>

1. Department of Pharmaceutical Sciences, University of Milan, Via L. Mangiagalli 25, 20133 Milano, Italy; samuele.ciceri@unimi.it (S.C.); enrico.fassi@unimi.it (E.M.A.F.); giovanni.grazioso@unimi.it (G.G.)
  2. Department of Medical Biotechnology and Translational Medicine, University of Milan, Via C. Saldini 50, 20133 Milano, Italy; diego.colombo@unimi.it (D.C.); patrizia.ferraboschi@unimi.it (P.F.)
  3. Chemical-Pharmaceutical Consulting and IP Management, Viale G. da Cermenate 58, 20141 Milano, Italy; grisenti.paride60@gmail.com
  4. Tecnomed Foundation, University of Milano-Bicocca, Via Pergolesi 33, 20900 Monza, Italy; marco.iannone@unimib.it
  5. Department of Chemistry, Università degli Studi di Milano, via Golgi 19, 20133 Milano, Italy; carlo.castellano@unimi.it
- \* Correspondence: fiorella.meneghetti@unimi.it; Tel.: +39-02-50319306

## INDEX

|                   |                                                                                                                                                                       |
|-------------------|-----------------------------------------------------------------------------------------------------------------------------------------------------------------------|
| <b>Figure S1</b>  | $^1\text{H}$ NMR of compound <b>5</b>                                                                                                                                 |
| <b>Figure S2</b>  | $^{13}\text{C}$ NMR of compound <b>5</b>                                                                                                                              |
| <b>Figure S3</b>  | COSY of compound <b>5</b>                                                                                                                                             |
| <b>Figure S4</b>  | $^1\text{H}$ - $^{13}\text{C}$ HSQC of compound <b>5</b>                                                                                                              |
| <b>Figure S5</b>  | $^1\text{H}$ - $^{13}\text{C}$ HMBC of compound <b>5</b>                                                                                                              |
| <b>Figure S6</b>  | $^1\text{H}$ - $^{15}\text{N}$ HMBC of compound <b>5</b>                                                                                                              |
| <b>Figure S7</b>  | $^1\text{H}$ - $^{15}\text{N}$ HSQC of compound <b>5</b>                                                                                                              |
| <b>Figure S8</b>  | $^1\text{H}$ NMR of compound <b>6</b>                                                                                                                                 |
| <b>Figure S9</b>  | $^{13}\text{C}$ NMR of compound <b>6</b>                                                                                                                              |
| <b>Figure S10</b> | COSY of compound <b>6</b>                                                                                                                                             |
| <b>Figure S11</b> | $^1\text{H}$ - $^{13}\text{C}$ HSQC of compound <b>6</b>                                                                                                              |
| <b>Figure S12</b> | $^1\text{H}$ - $^{13}\text{C}$ HMBC of compound <b>6</b>                                                                                                              |
| <b>Figure S13</b> | $^1\text{H}$ - $^{15}\text{N}$ HMBC of compound <b>6</b>                                                                                                              |
| <b>Figure S14</b> | $^1\text{H}$ - $^{15}\text{N}$ HSQC of compound <b>6</b>                                                                                                              |
| <b>Figure S15</b> | $^1\text{H}$ NMR of compound <b>7</b>                                                                                                                                 |
| <b>Figure S16</b> | $^{13}\text{C}$ NMR of compound <b>7</b>                                                                                                                              |
| <b>Figure S17</b> | COSY of compound <b>7</b>                                                                                                                                             |
| <b>Figure S18</b> | $^1\text{H}$ - $^{13}\text{C}$ HSQC of compound <b>7</b>                                                                                                              |
| <b>Figure S19</b> | $^1\text{H}$ - $^{13}\text{C}$ HMBC of compound <b>7</b>                                                                                                              |
| <b>Figure S20</b> | $^1\text{H}$ - $^{15}\text{N}$ HMBC of compound <b>7</b>                                                                                                              |
| <b>Figure S21</b> | $^1\text{H}$ - $^{15}\text{N}$ HSQC of compound <b>7</b>                                                                                                              |
| <b>Figure S22</b> | $^1\text{H}$ NMR of compound <b>8</b>                                                                                                                                 |
| <b>Figure S23</b> | $^{13}\text{C}$ NMR of compound <b>8</b>                                                                                                                              |
| <b>Figure S24</b> | COSY of compound <b>8</b>                                                                                                                                             |
| <b>Figure S25</b> | $^1\text{H}$ - $^{13}\text{C}$ HSQC of compound <b>8</b>                                                                                                              |
| <b>Figure S26</b> | $^1\text{H}$ - $^{13}\text{C}$ HMBC of compound <b>8</b>                                                                                                              |
| <b>Figure S27</b> | $^1\text{H}$ - $^{15}\text{N}$ HMBC of compound <b>8</b>                                                                                                              |
| <b>Figure S28</b> | $^1\text{H}$ NMR of compound <b>9</b>                                                                                                                                 |
| <b>Figure S29</b> | $^{13}\text{C}$ NMR of compound <b>9</b>                                                                                                                              |
| <b>Figure S30</b> | COSY of compound <b>9</b>                                                                                                                                             |
| <b>Figure S31</b> | $^1\text{H}$ - $^{13}\text{C}$ HSQC of compound <b>9</b>                                                                                                              |
| <b>Figure S32</b> | $^1\text{H}$ - $^{13}\text{C}$ HMBC of compound <b>9</b>                                                                                                              |
| <b>Figure S33</b> | $^1\text{H}$ - $^{15}\text{N}$ HMBC of compound <b>9</b>                                                                                                              |
| <b>Figure S34</b> | $^1\text{H}$ NMR of compound <b>1</b>                                                                                                                                 |
| <b>Figure S35</b> | $^{13}\text{C}$ NMR of compound <b>1</b>                                                                                                                              |
| <b>Figure S36</b> | COSY of compound <b>1</b>                                                                                                                                             |
| <b>Figure S37</b> | $^1\text{H}$ - $^{13}\text{C}$ HSQC of compound <b>1</b>                                                                                                              |
| <b>Figure S38</b> | $^1\text{H}$ - $^{13}\text{C}$ HMBC of compound <b>1</b>                                                                                                              |
| <b>Figure S39</b> | $^1\text{H}$ - $^{15}\text{N}$ HMBC of compound <b>1</b>                                                                                                              |
| <b>Figure S40</b> | NOESY of compound <b>1</b>                                                                                                                                            |
| <b>Figure S41</b> | $^1\text{H}$ NMR of compound <b>1</b> in DMSO- $d_6$                                                                                                                  |
| <b>Figure S42</b> | $^1\text{H}$ NMR of compound <b>1</b> in $\text{D}_2\text{O}$                                                                                                         |
| <b>Figure S43</b> | $^1\text{H}$ NMR of compound <b>11</b>                                                                                                                                |
| <b>Figure S44</b> | COSY of compound <b>11</b>                                                                                                                                            |
| <b>Table S1</b>   | Relative energies and equilibrium percentages of the optimized conformations endowed with $\Delta E < 5$ kcal/mol in gas phase, in water and methanol solvent models. |
| <b>Table S2</b>   | Internuclear H-15/H-21 distance estimated by 2D NOESY experiment.                                                                                                     |

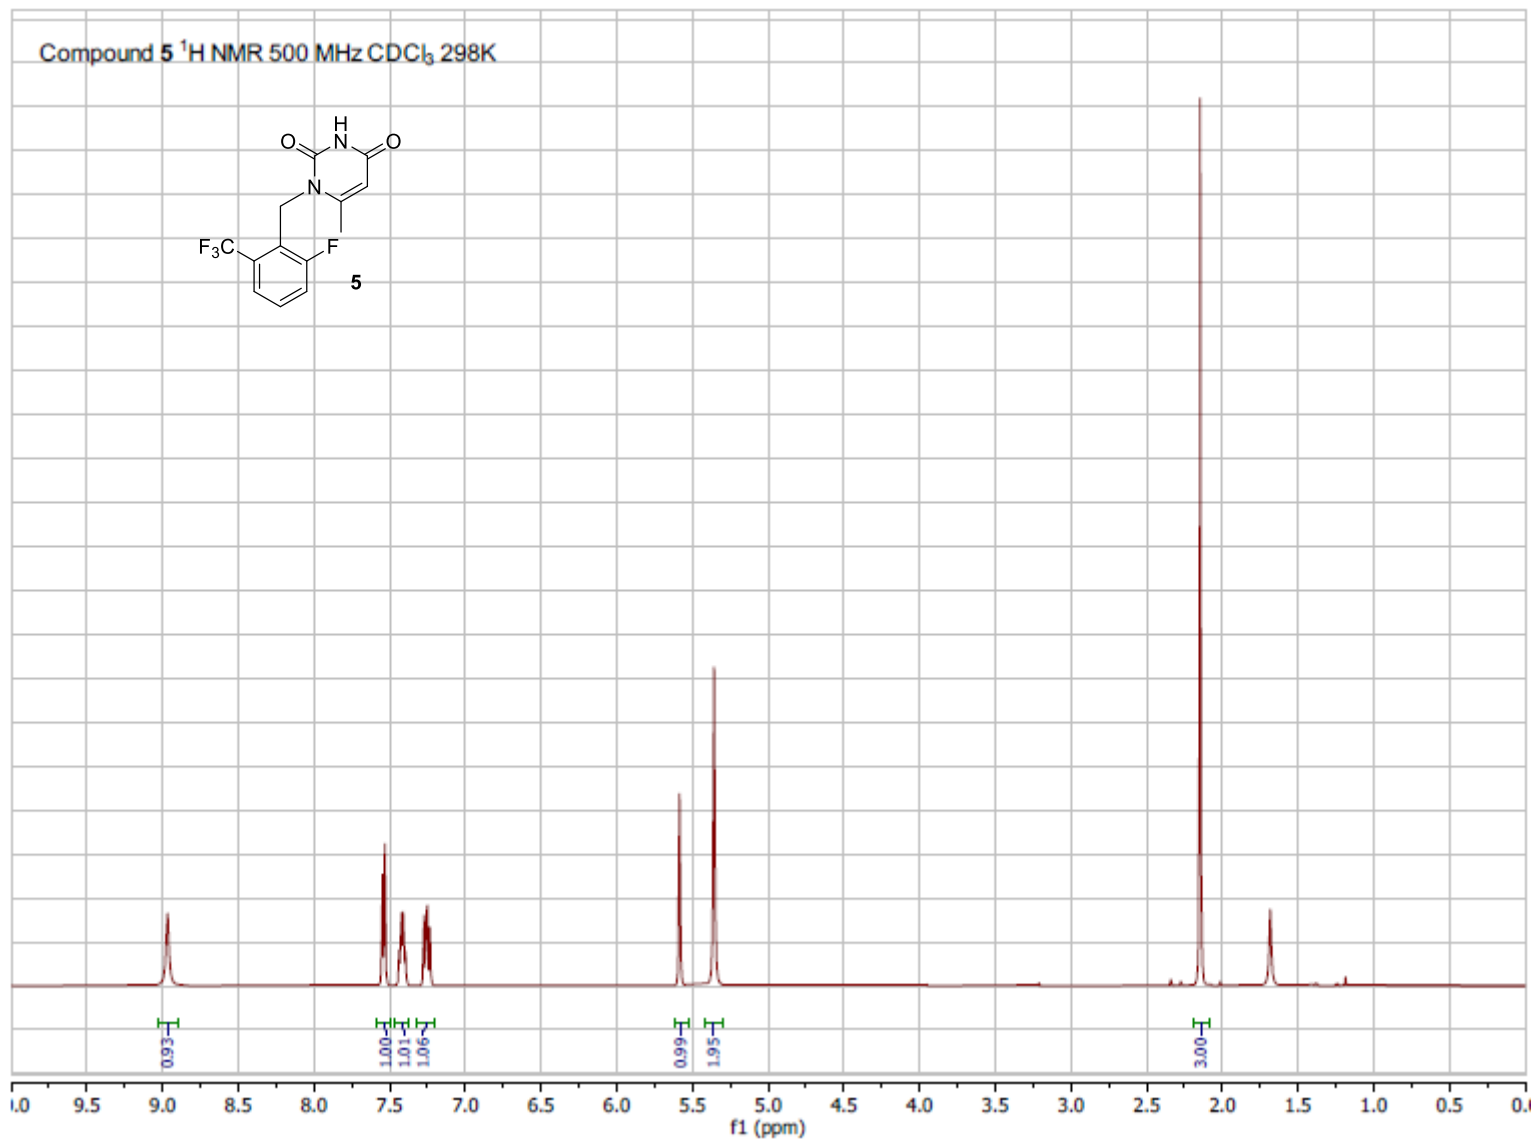

Figure S1.  $^1\text{H}$  NMR of compound **5**

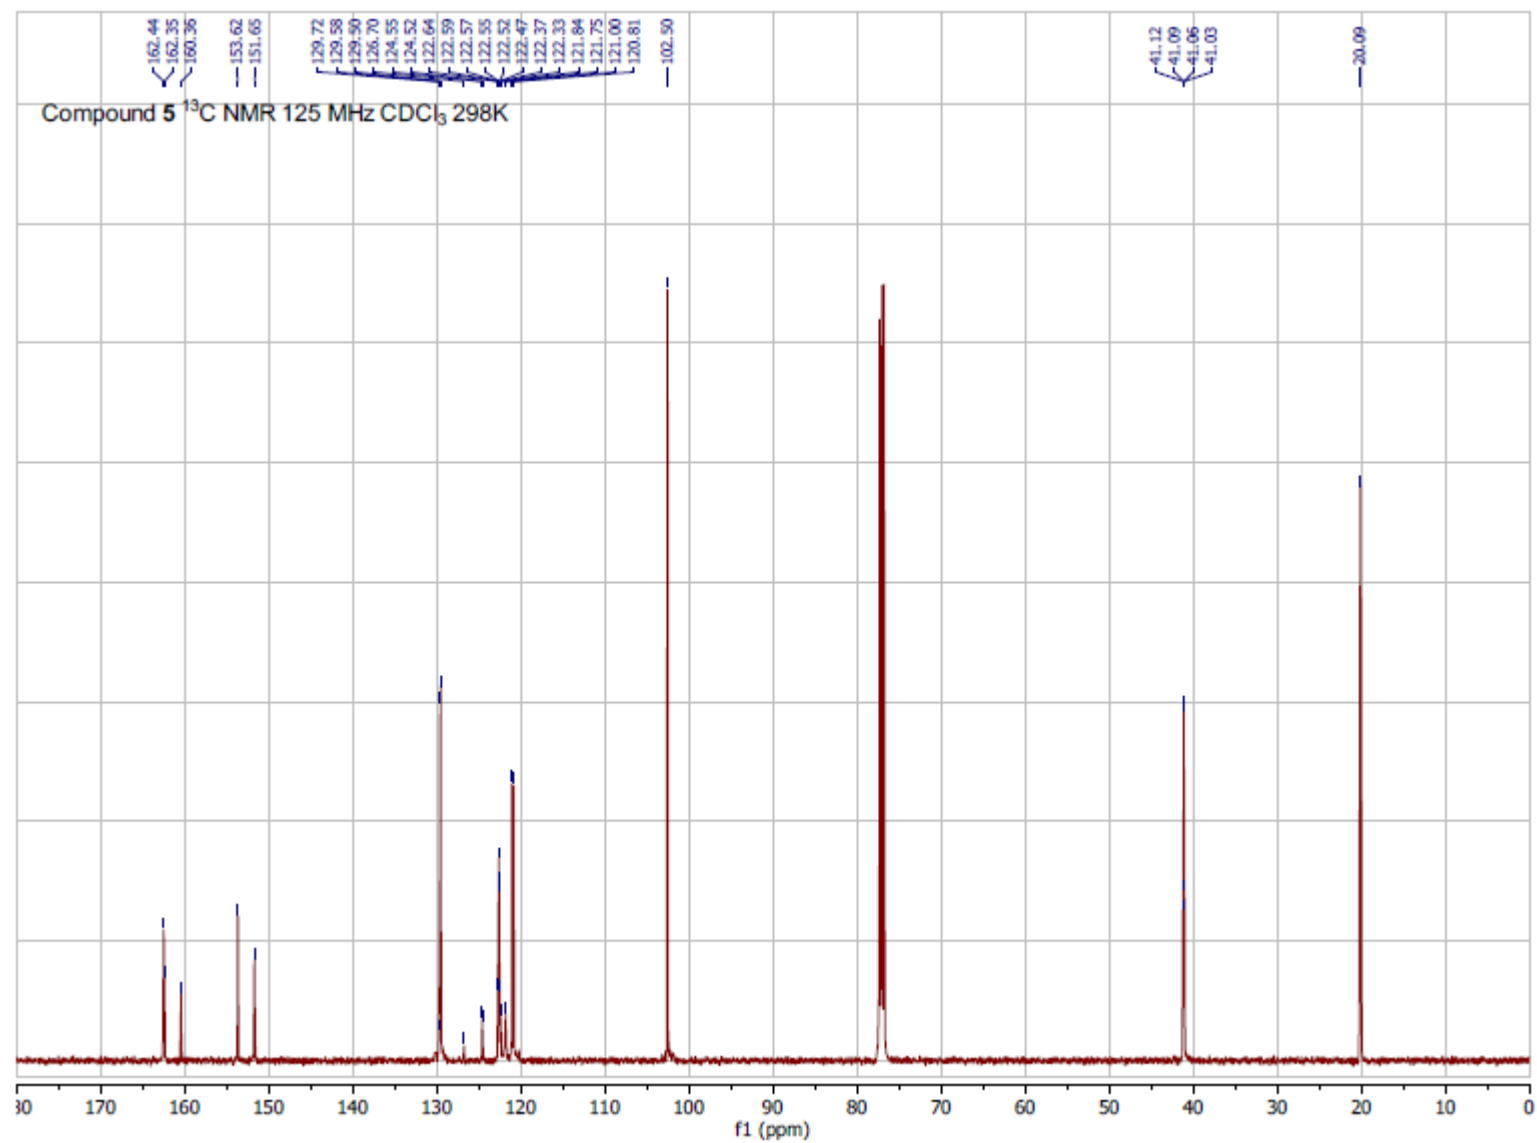

Figure S2.  $^{13}\text{C}$  NMR of compound 5

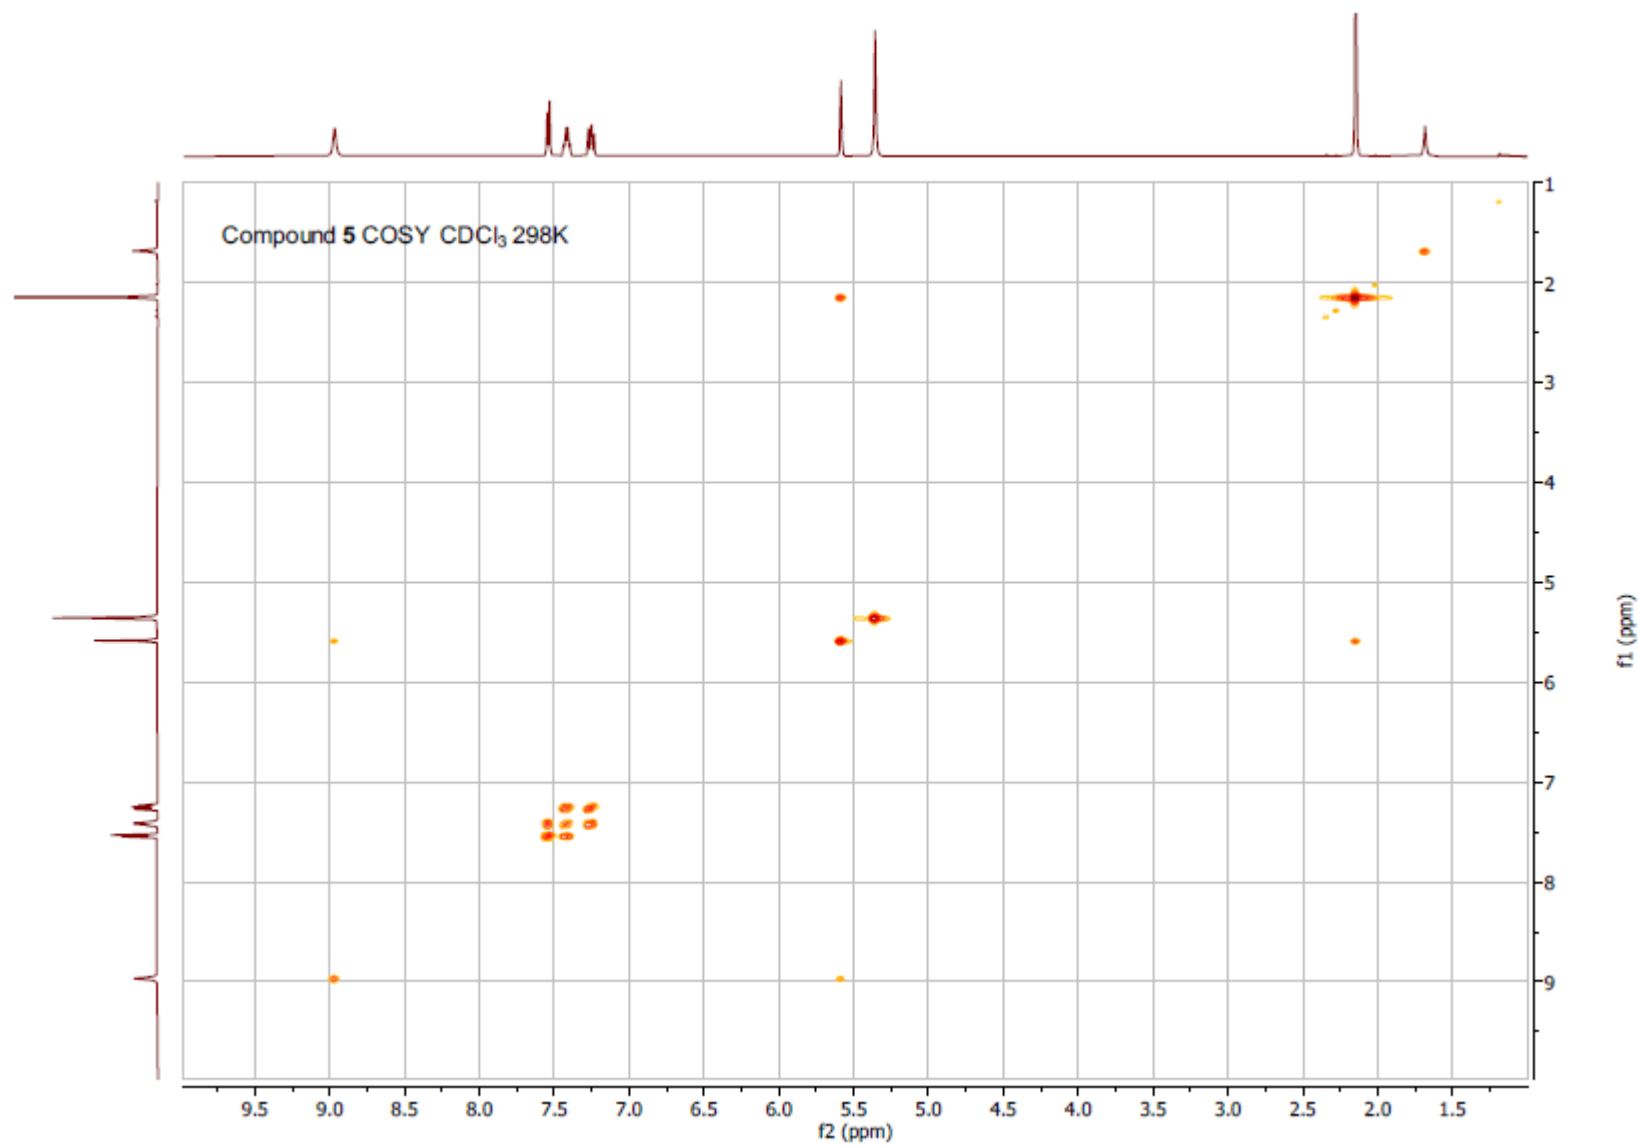

**Figure S3.** COSY of compound 5

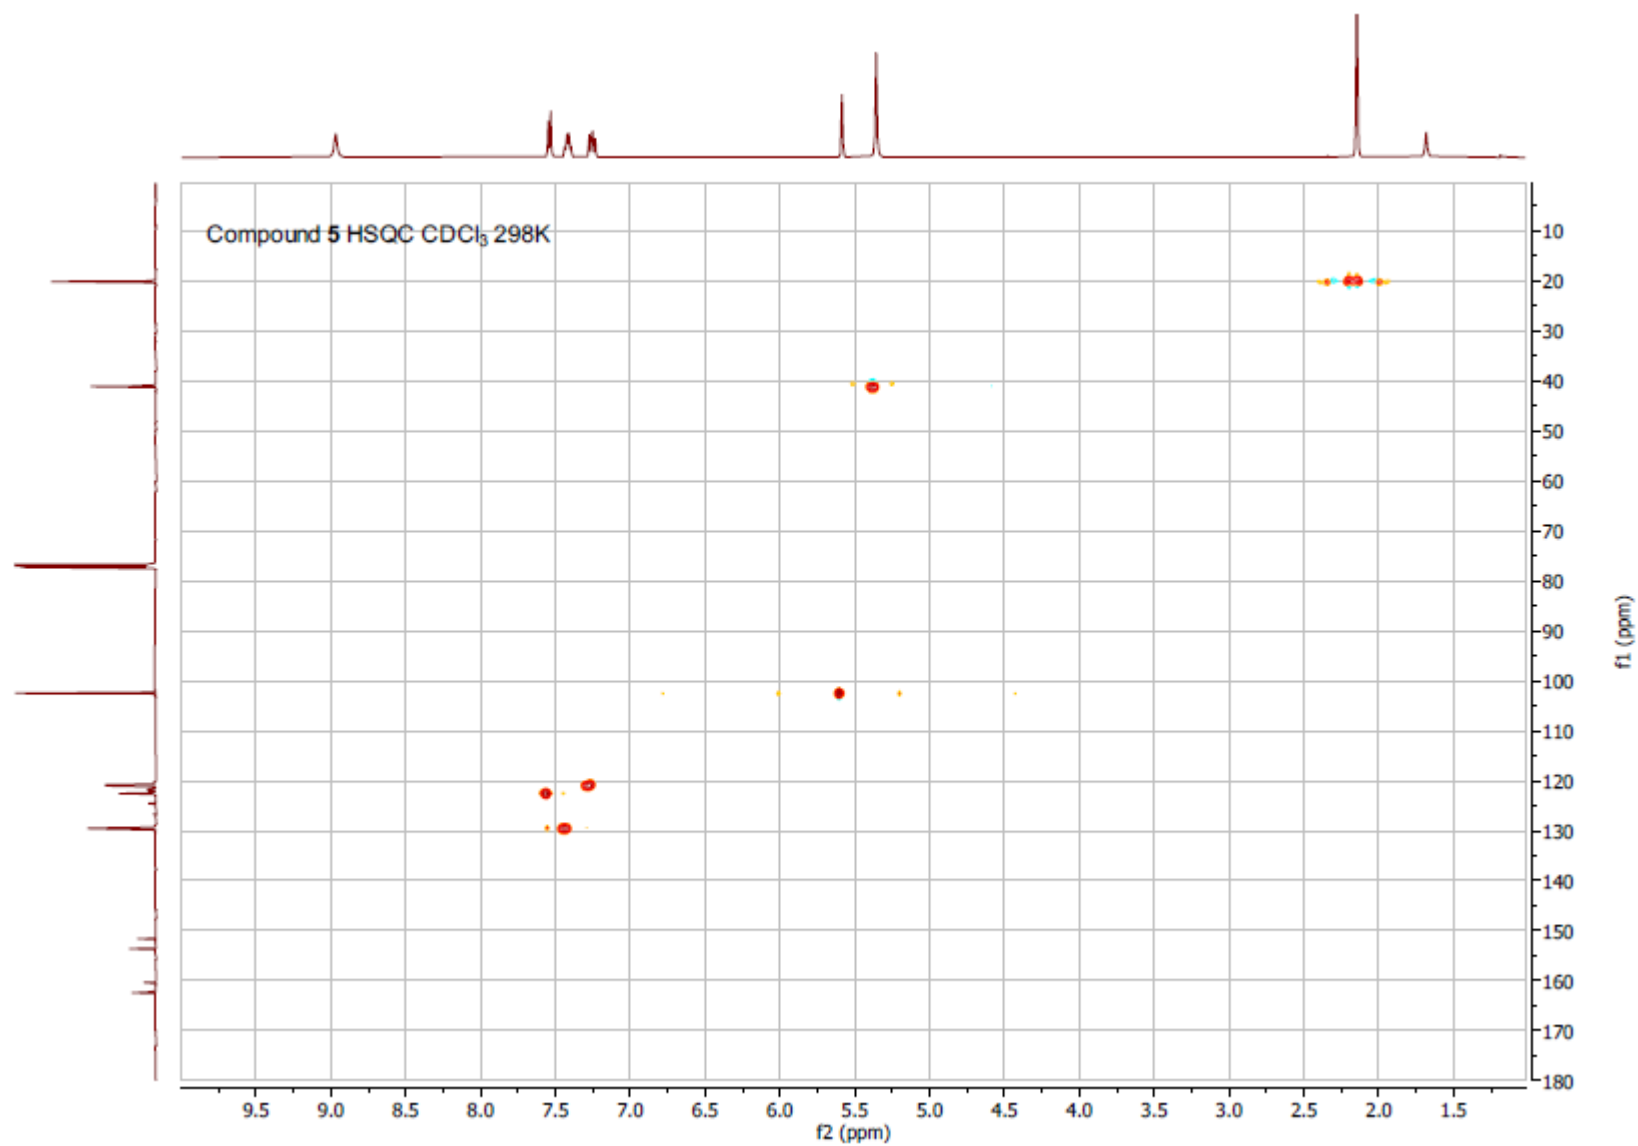

**Figure S4.**  $^1\text{H}$ - $^{13}\text{C}$  HSQC of compound 5

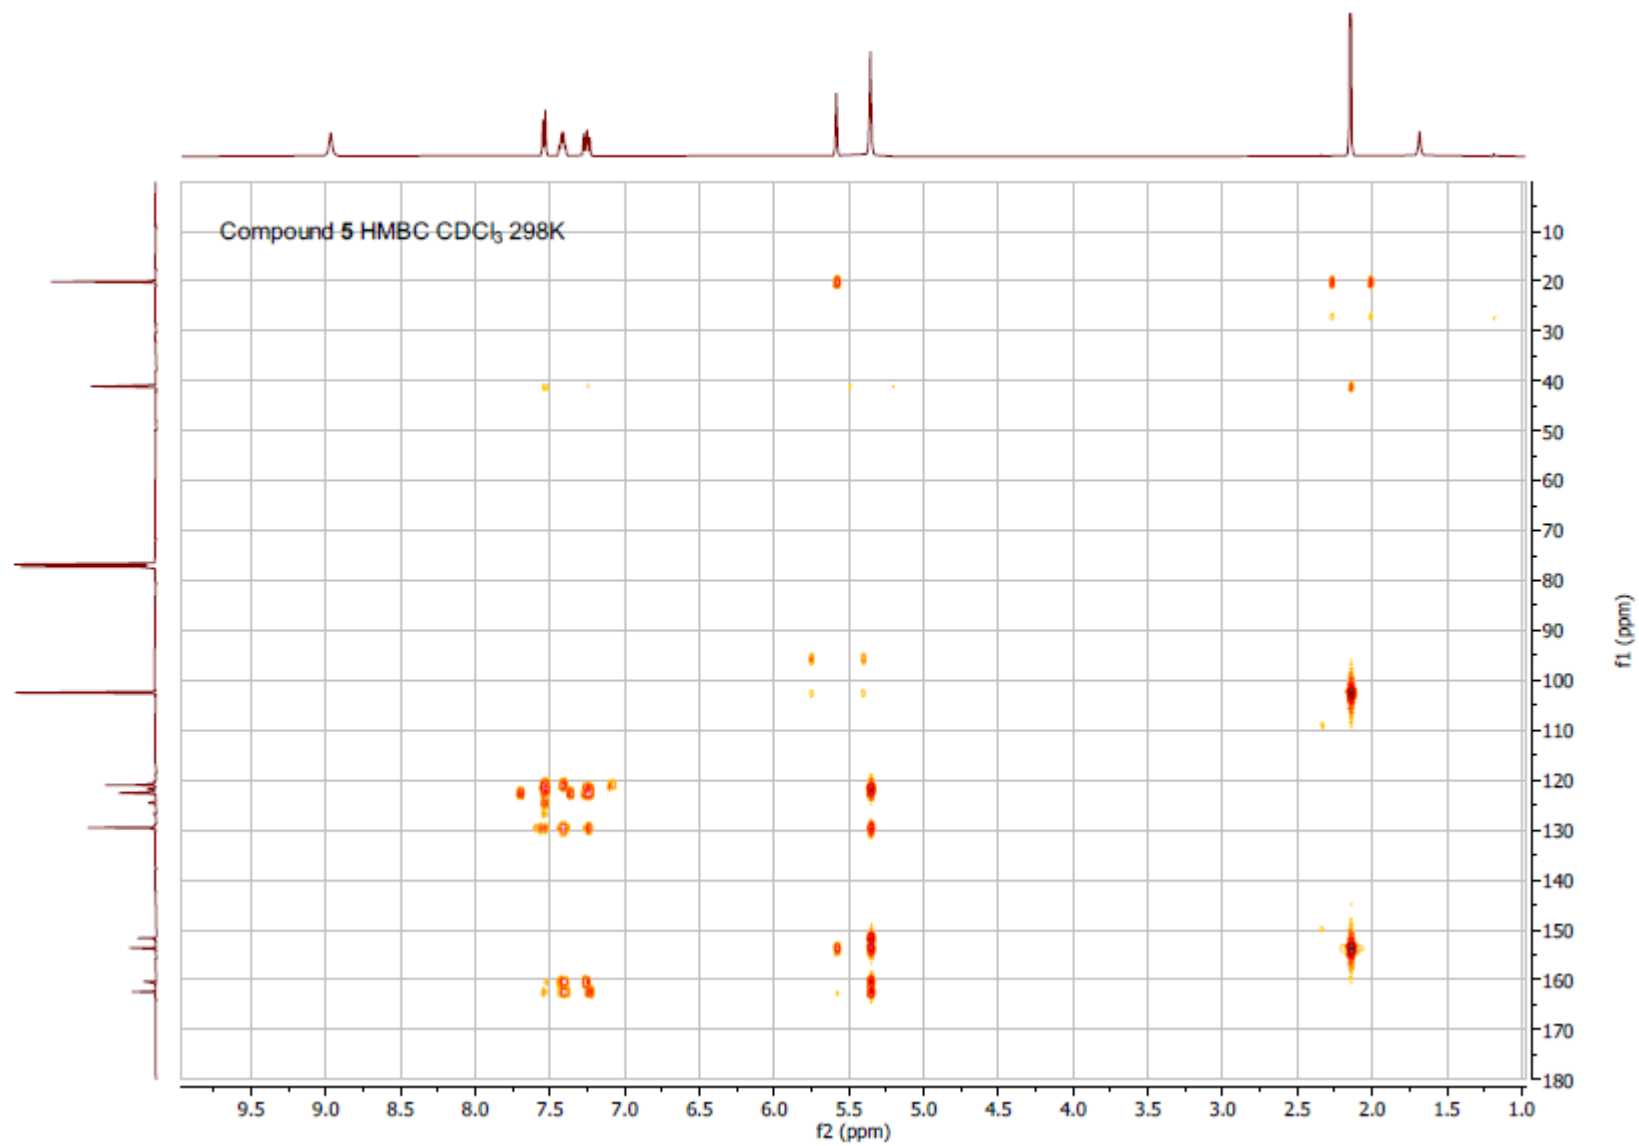

**Figure S5.**  $^1\text{H}$ - $^{13}\text{C}$  HMBC of compound 5

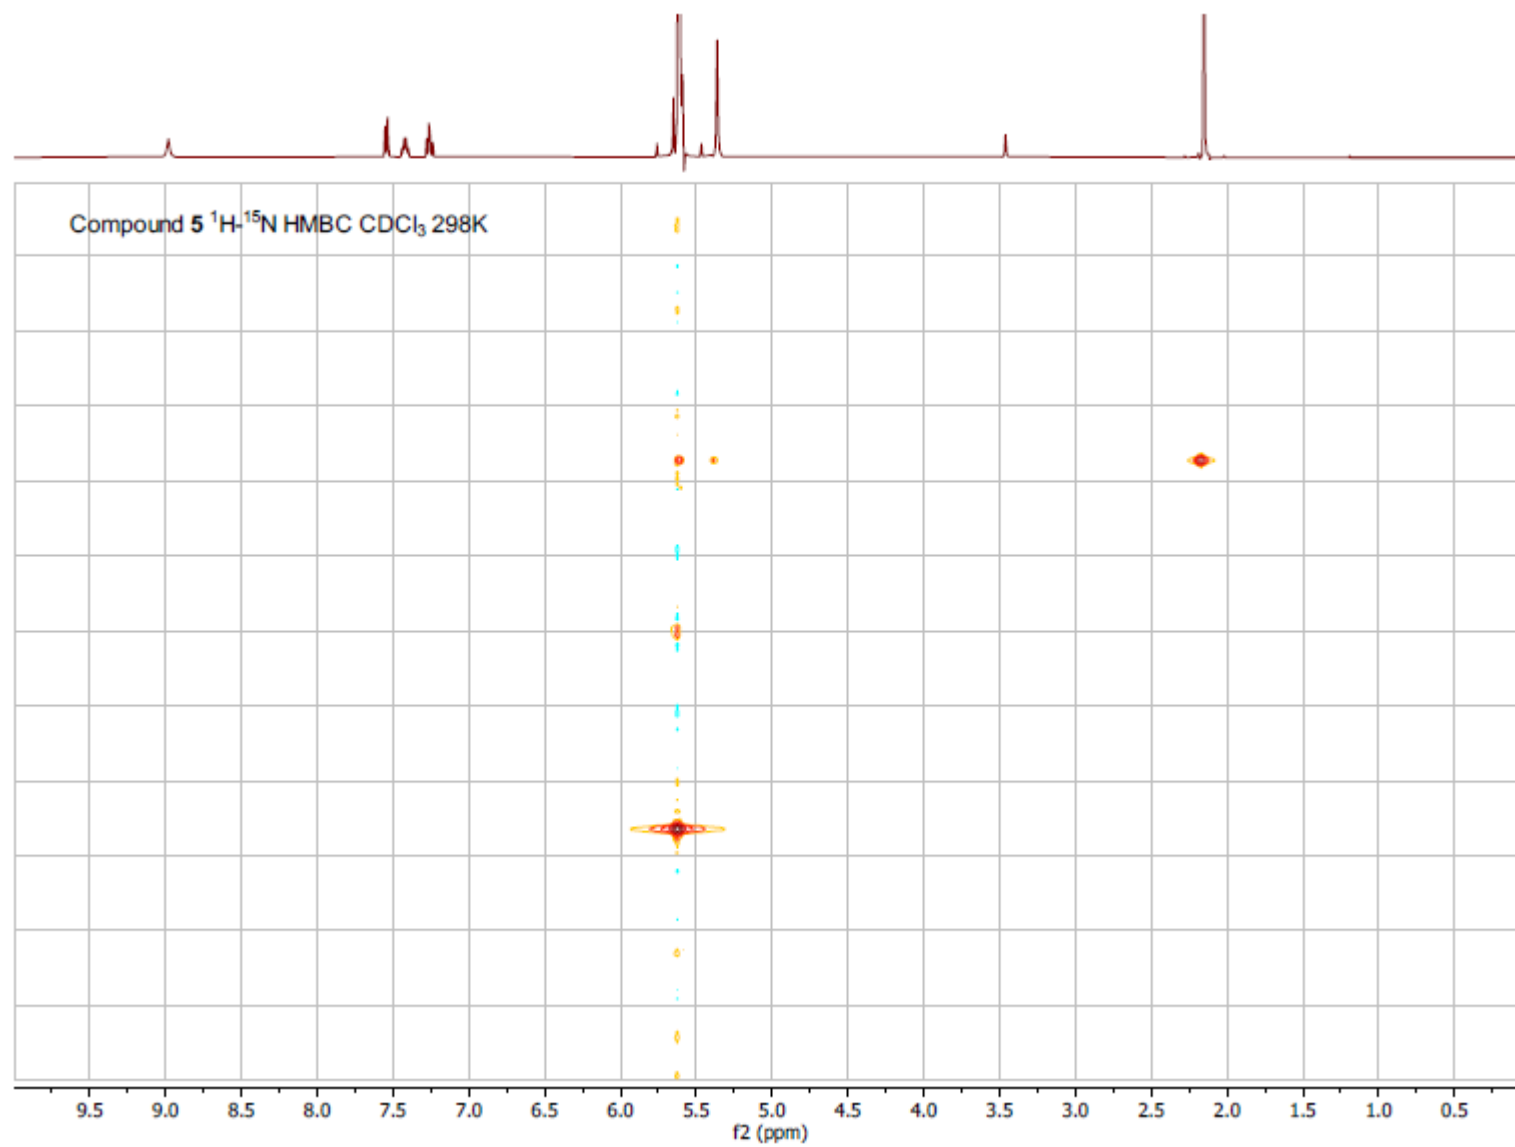

**Figure S6.**  $^1\text{H}$ - $^{15}\text{N}$  HMBC of compound 5



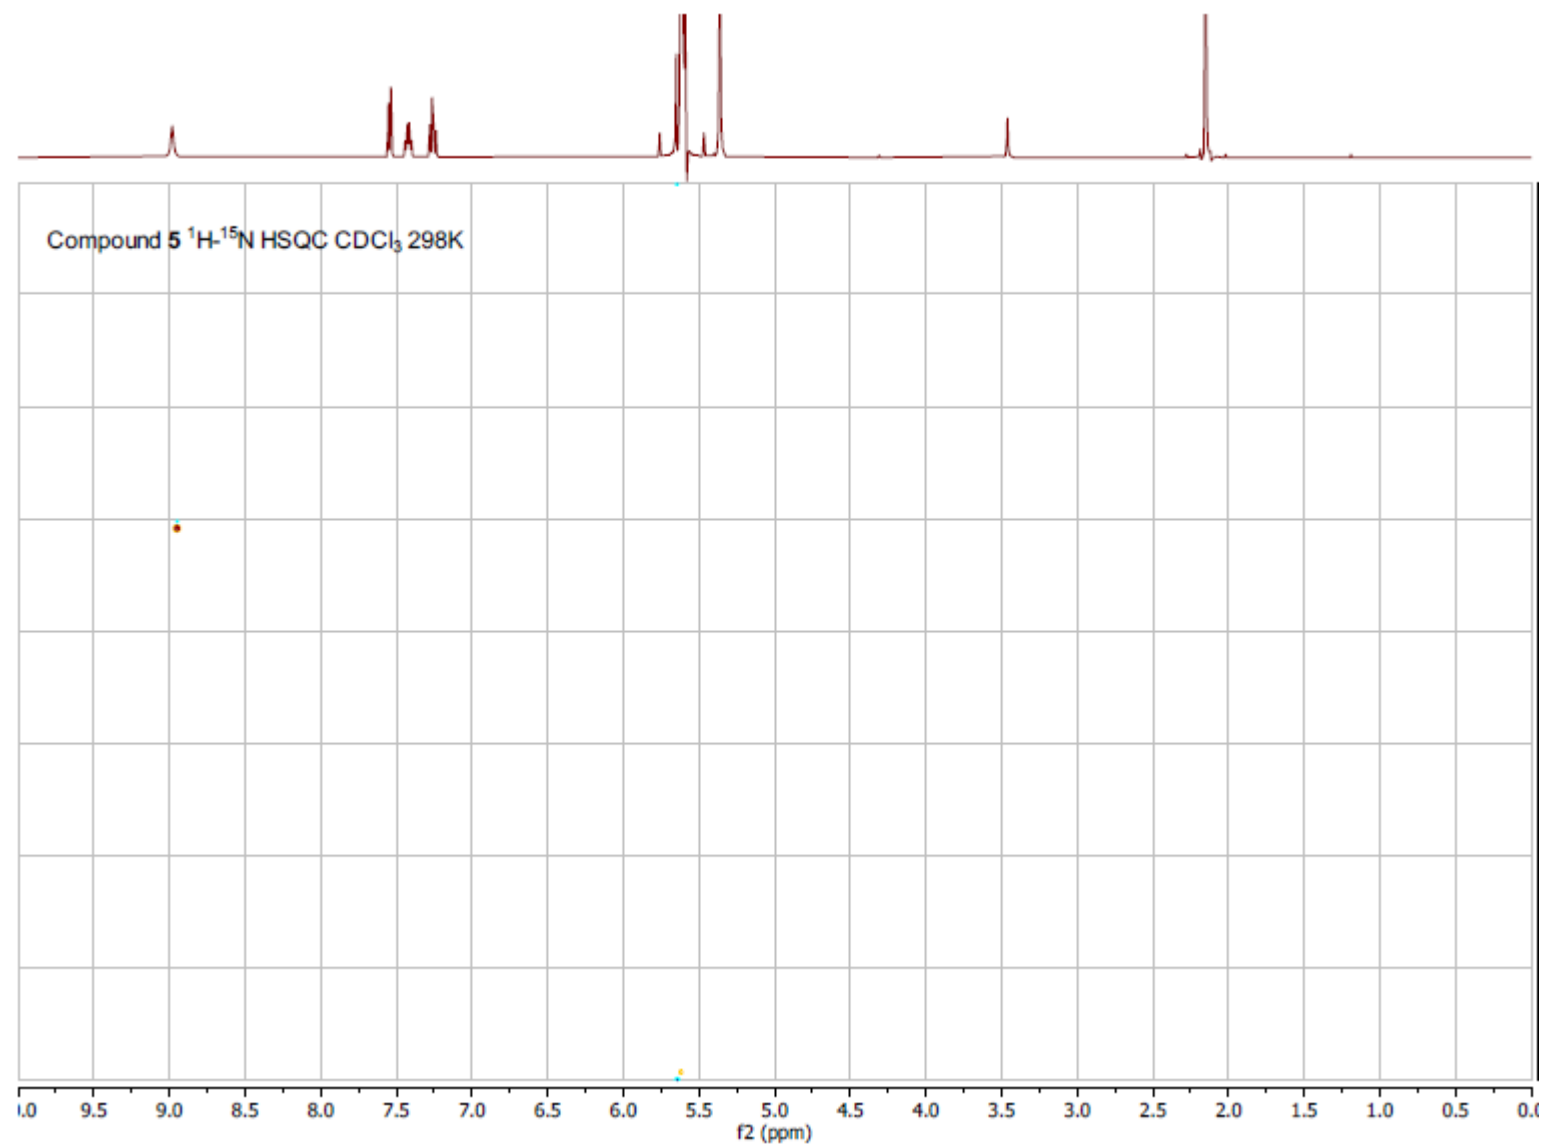

**Figure S7.**  $^1\text{H}$ - $^{15}\text{N}$  HSQC of compound 5

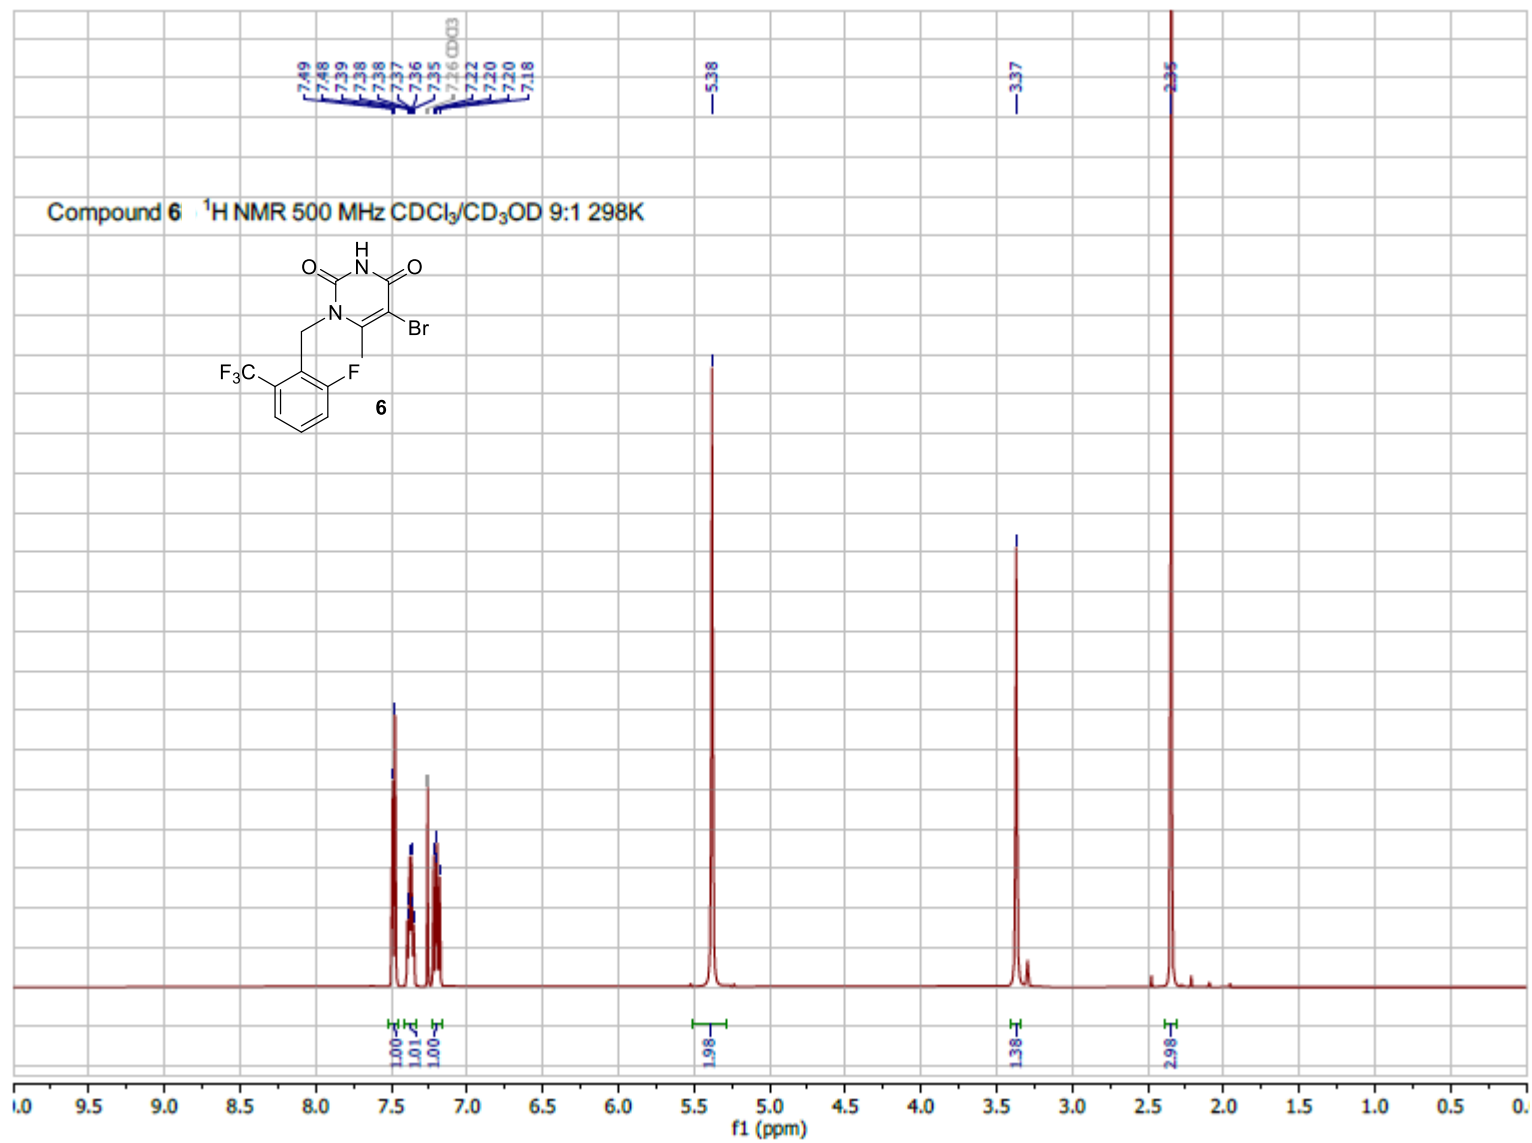

Figure S8.  $^1\text{H}$  NMR of compound **6**

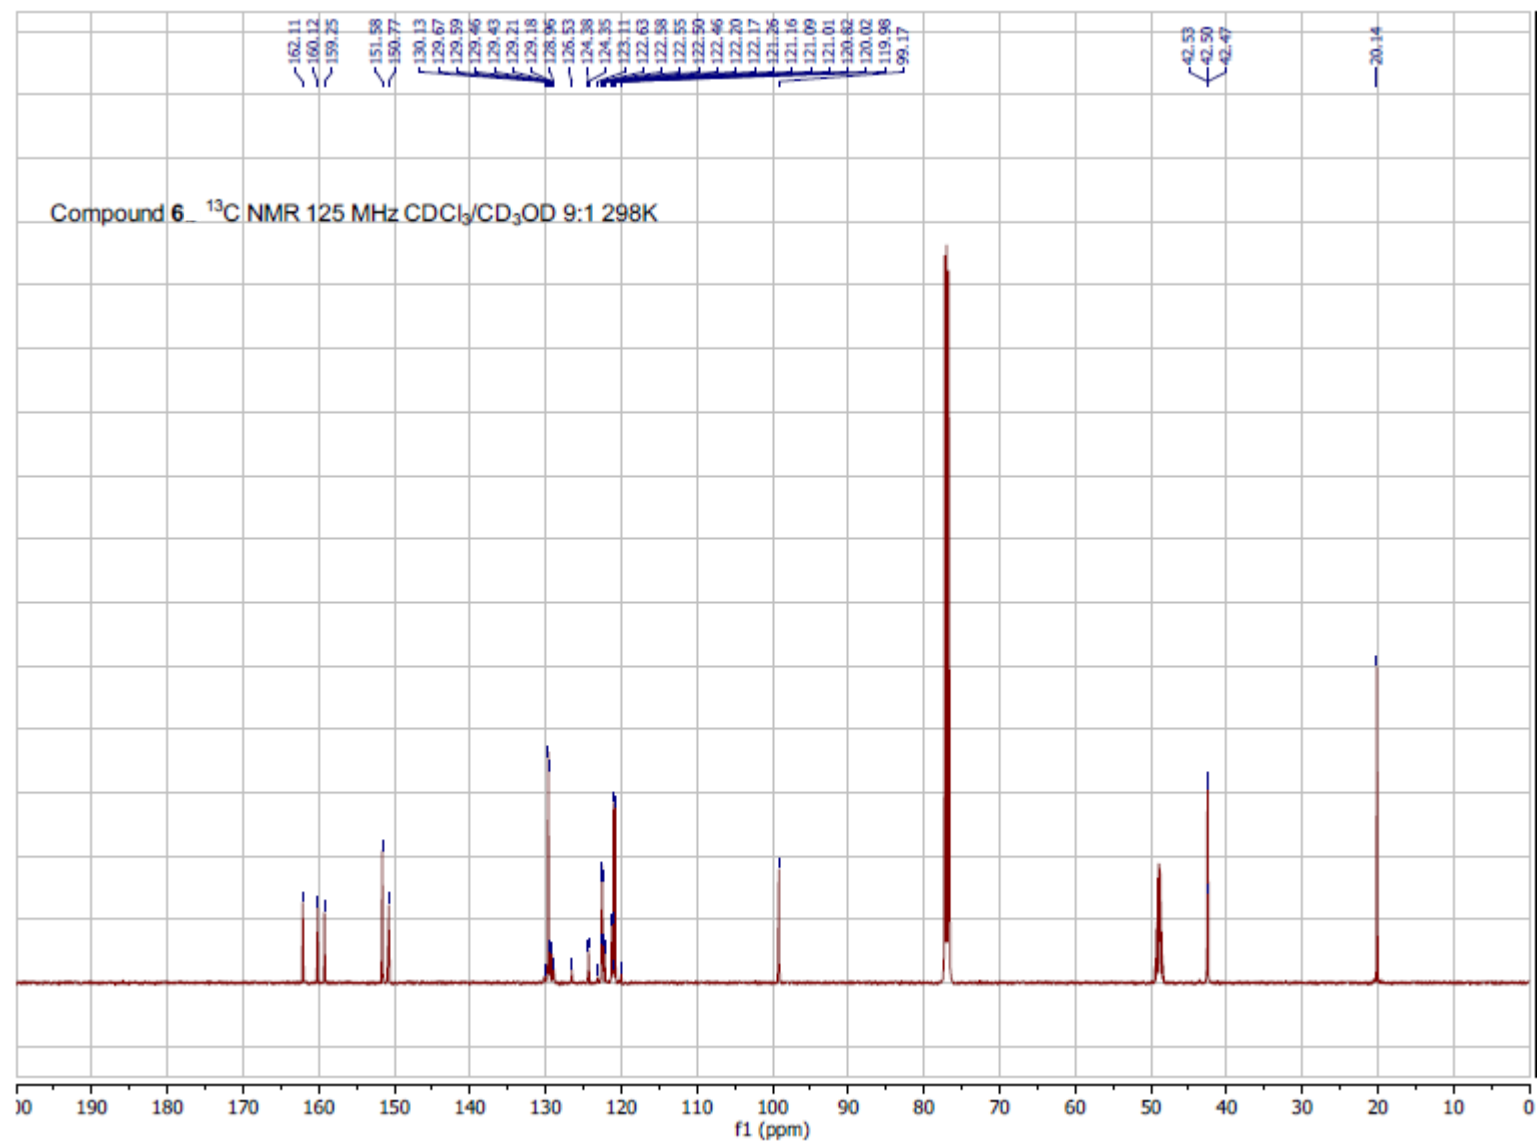

Figure S9.  $^{13}\text{C}$  NMR of compound 6

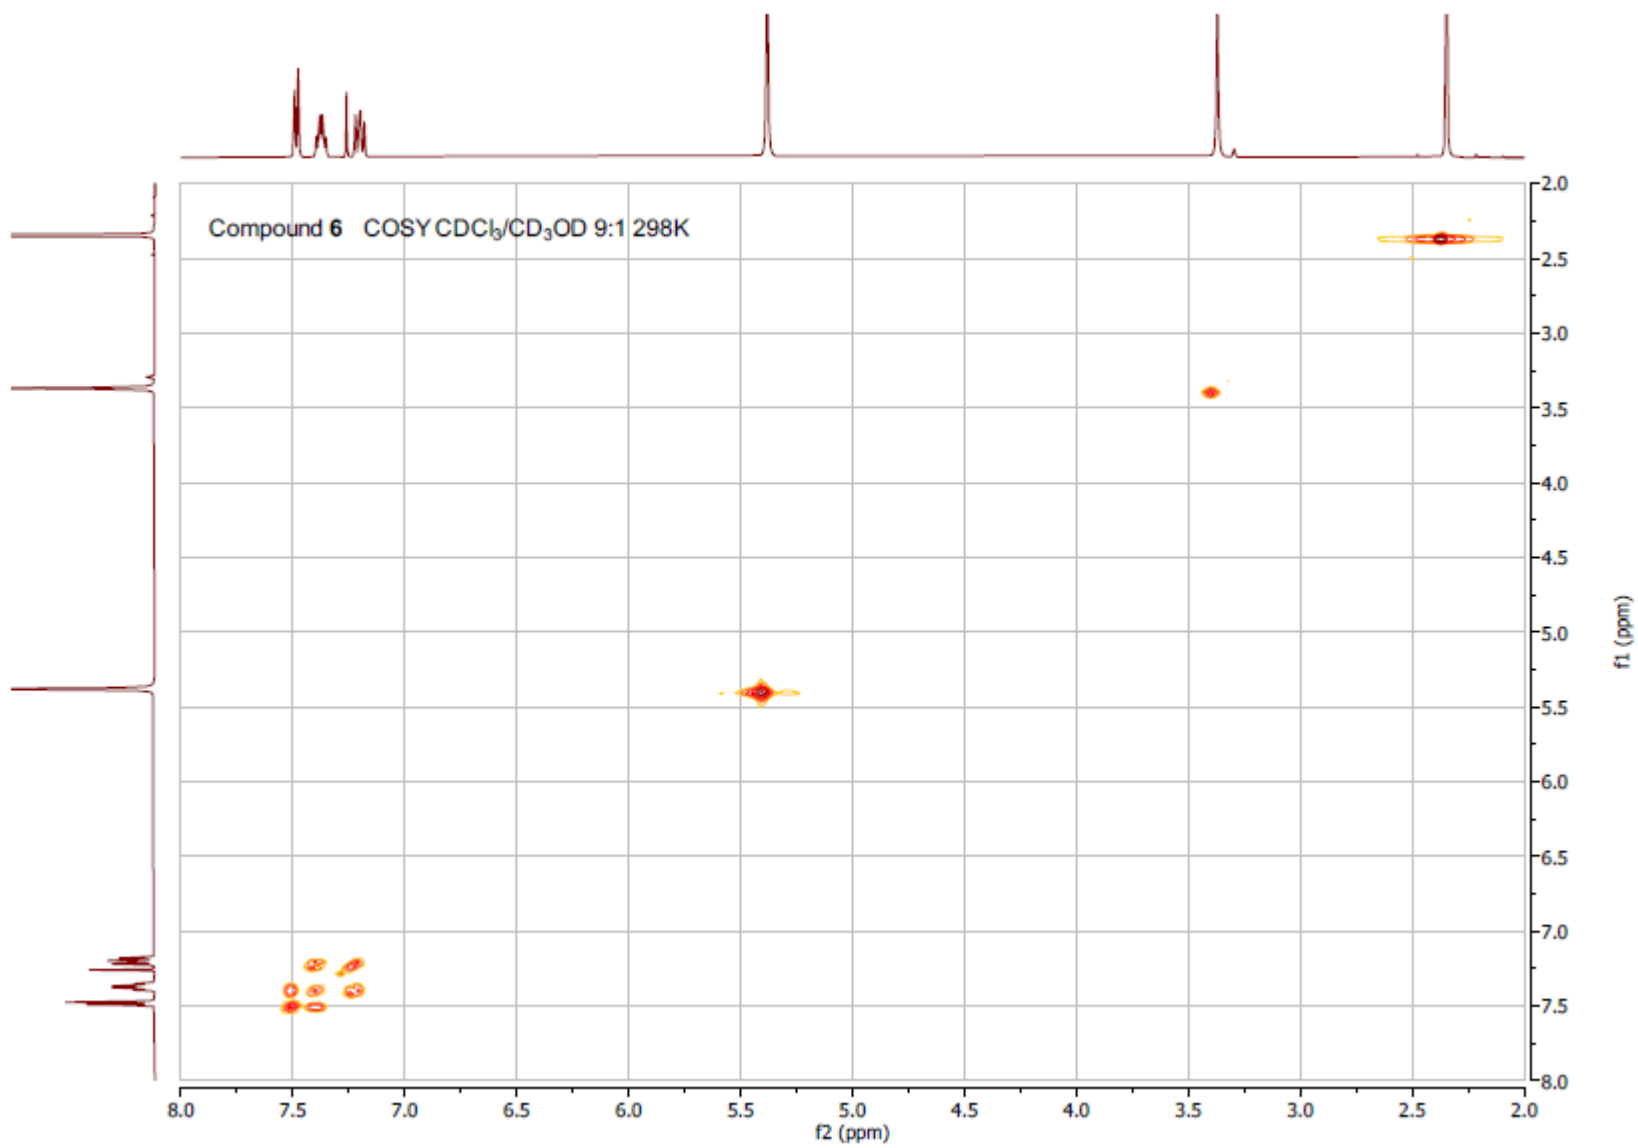

Figure S10. COSY of compound 6

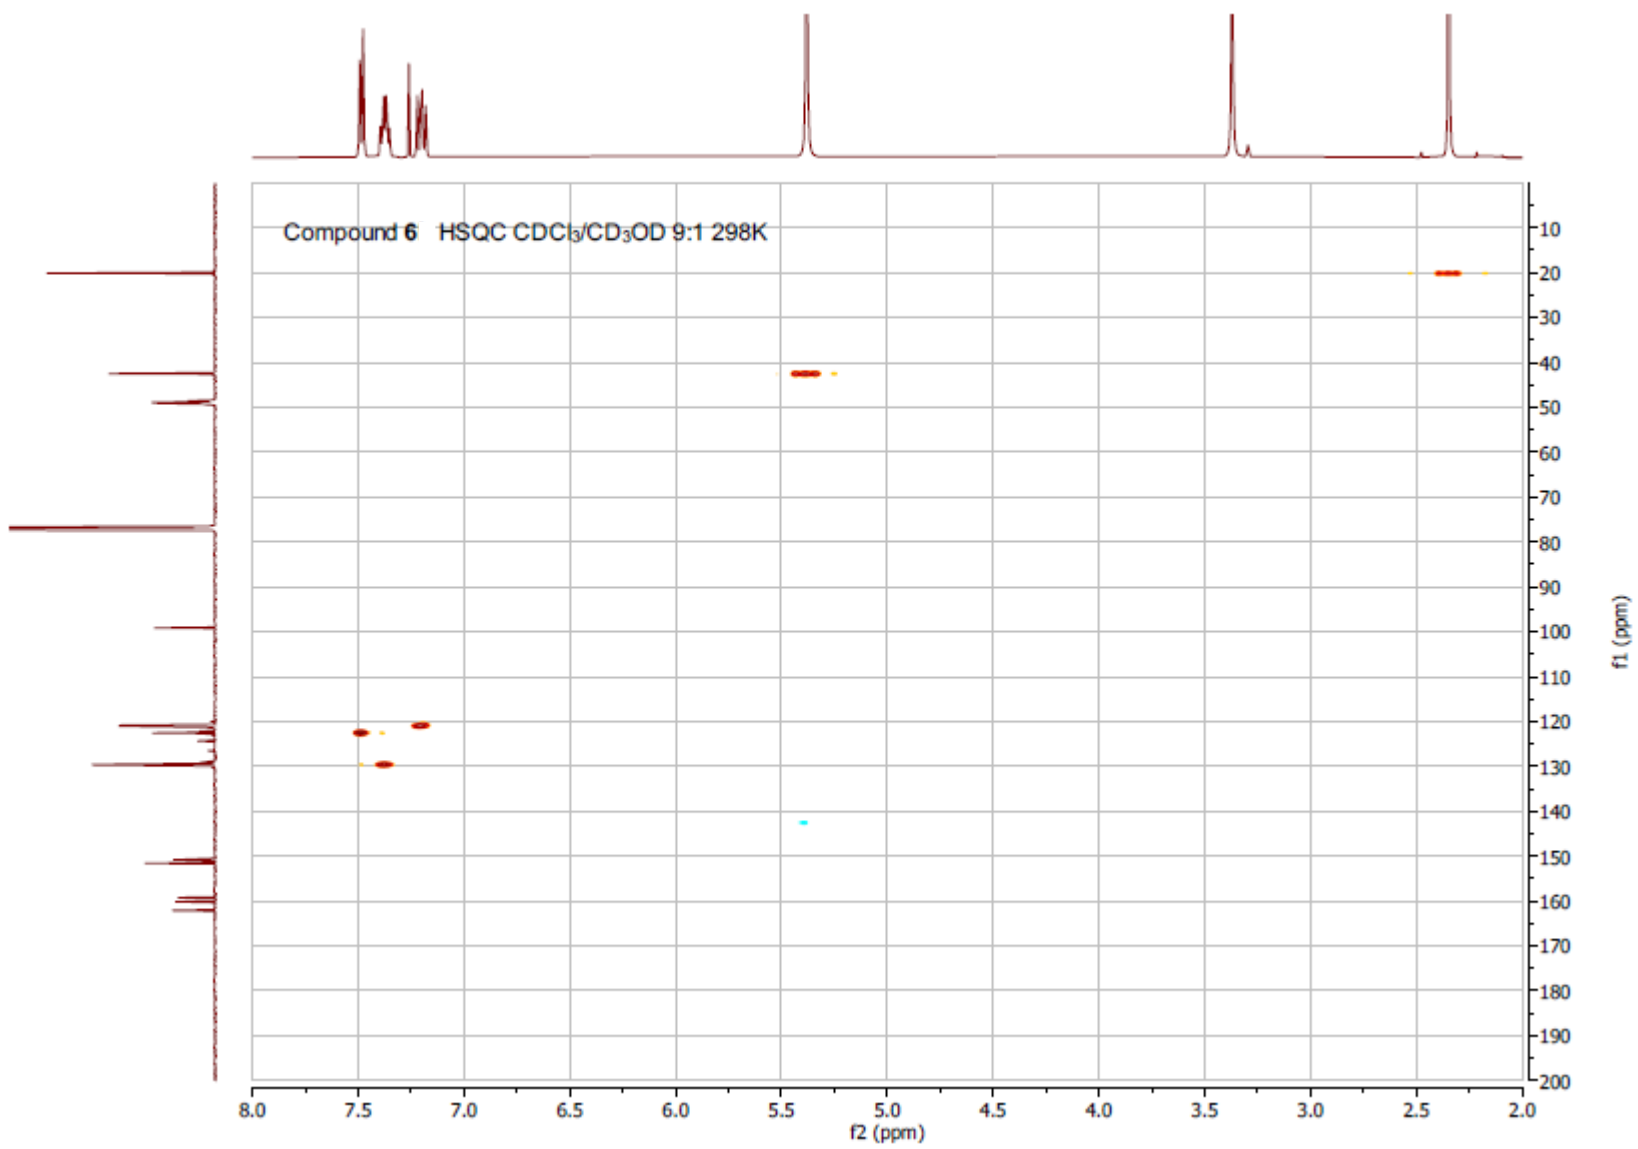

**Figure S11.**  $^1\text{H}$ - $^{13}\text{C}$  HSQC of compound 6

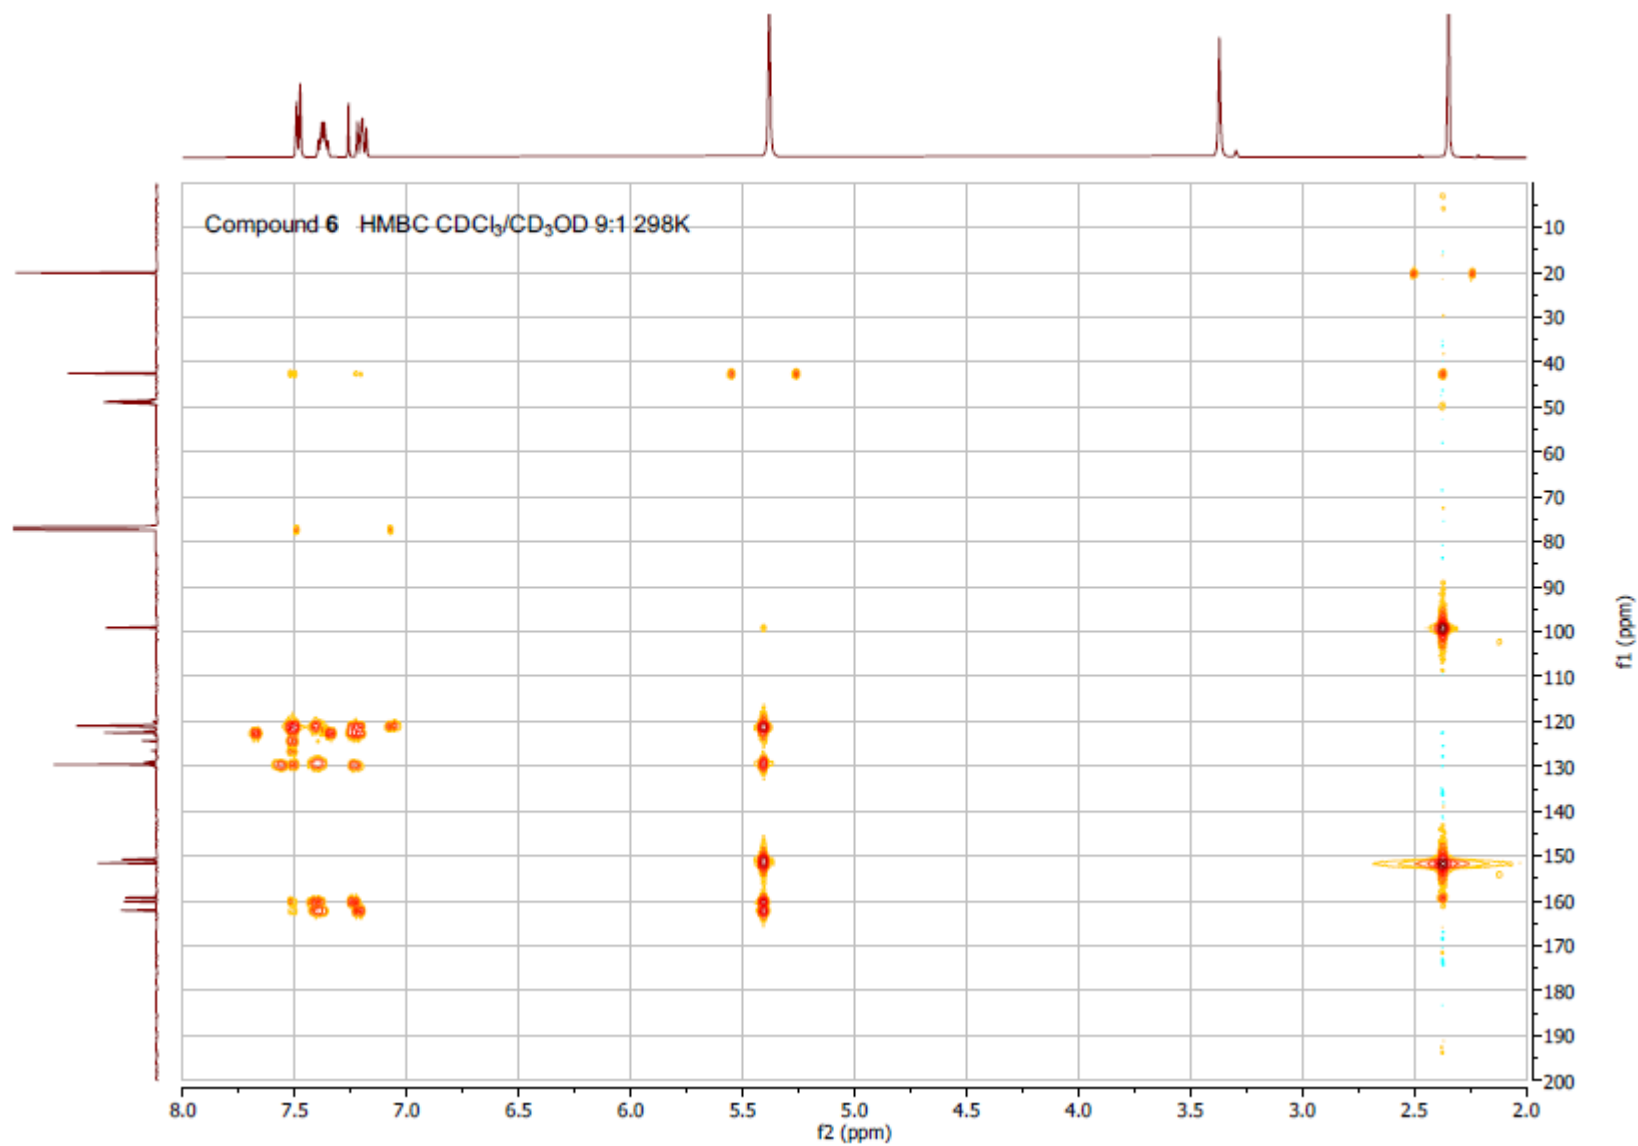

Figure S12.  $^1\text{H}$ - $^{13}\text{C}$  HMBC of compound 6

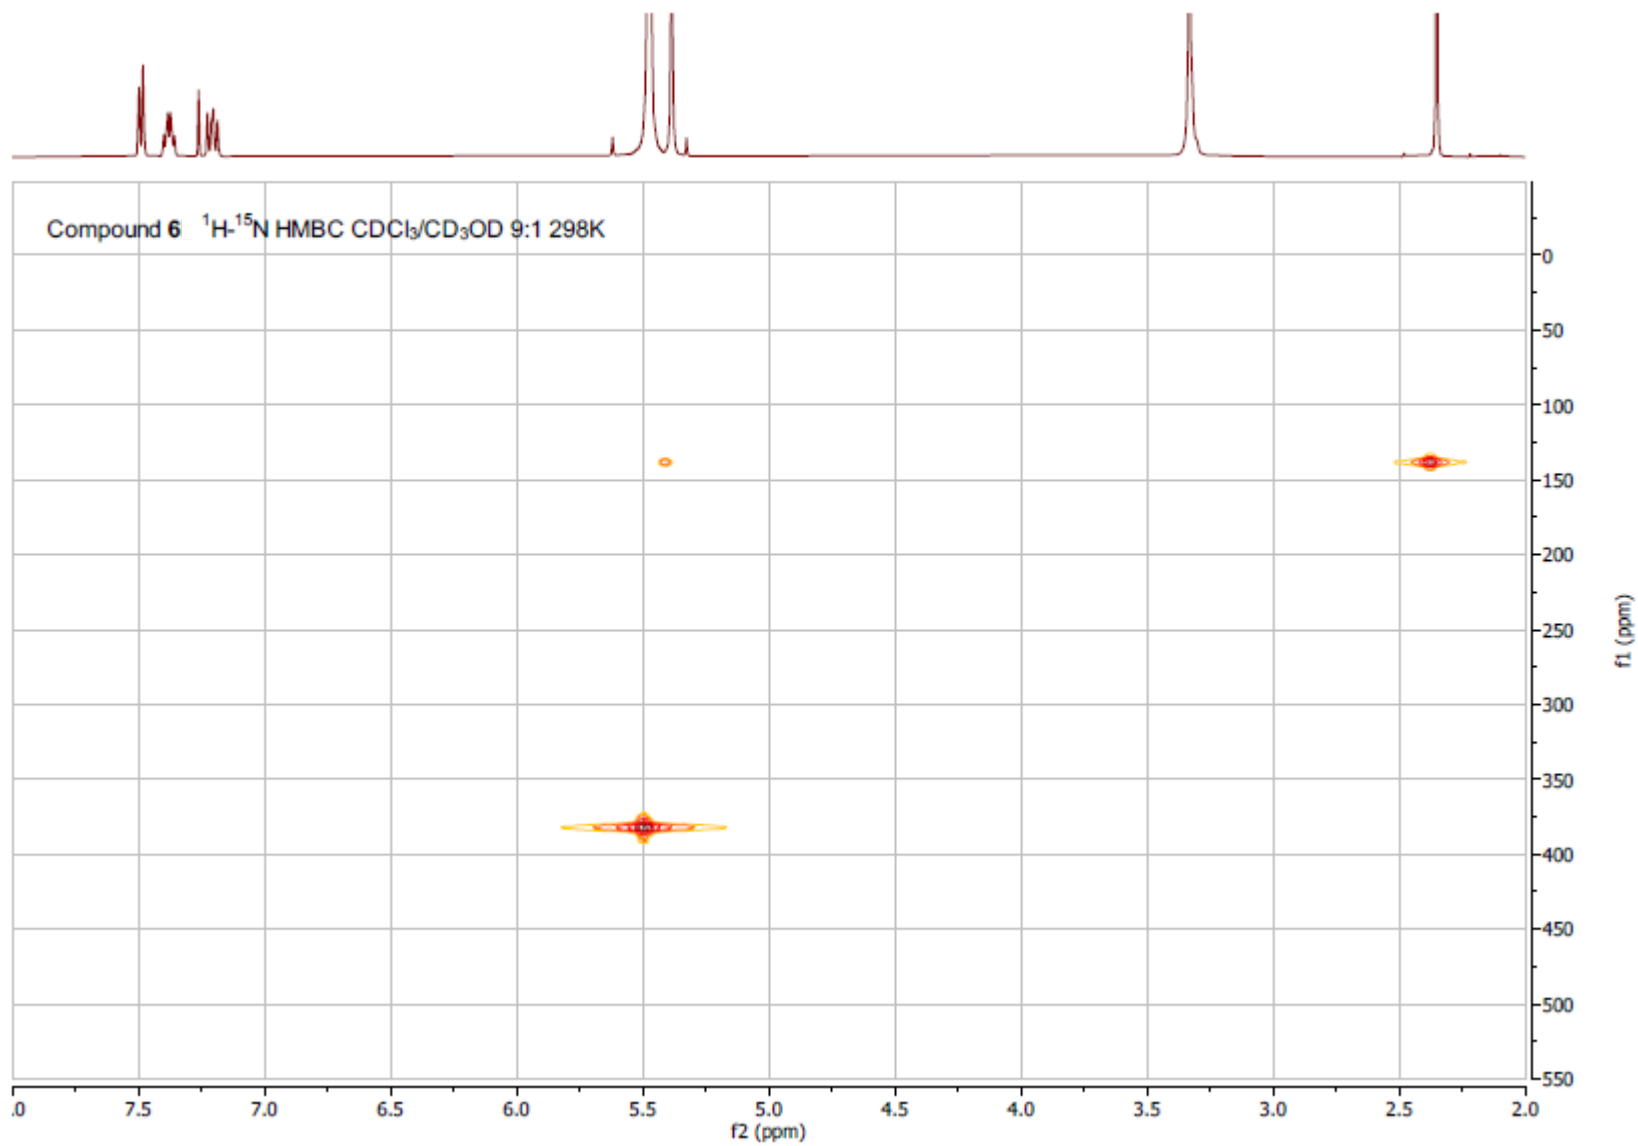

Figure S13.  $^1\text{H}$ - $^{15}\text{N}$  HMBC of compound 6

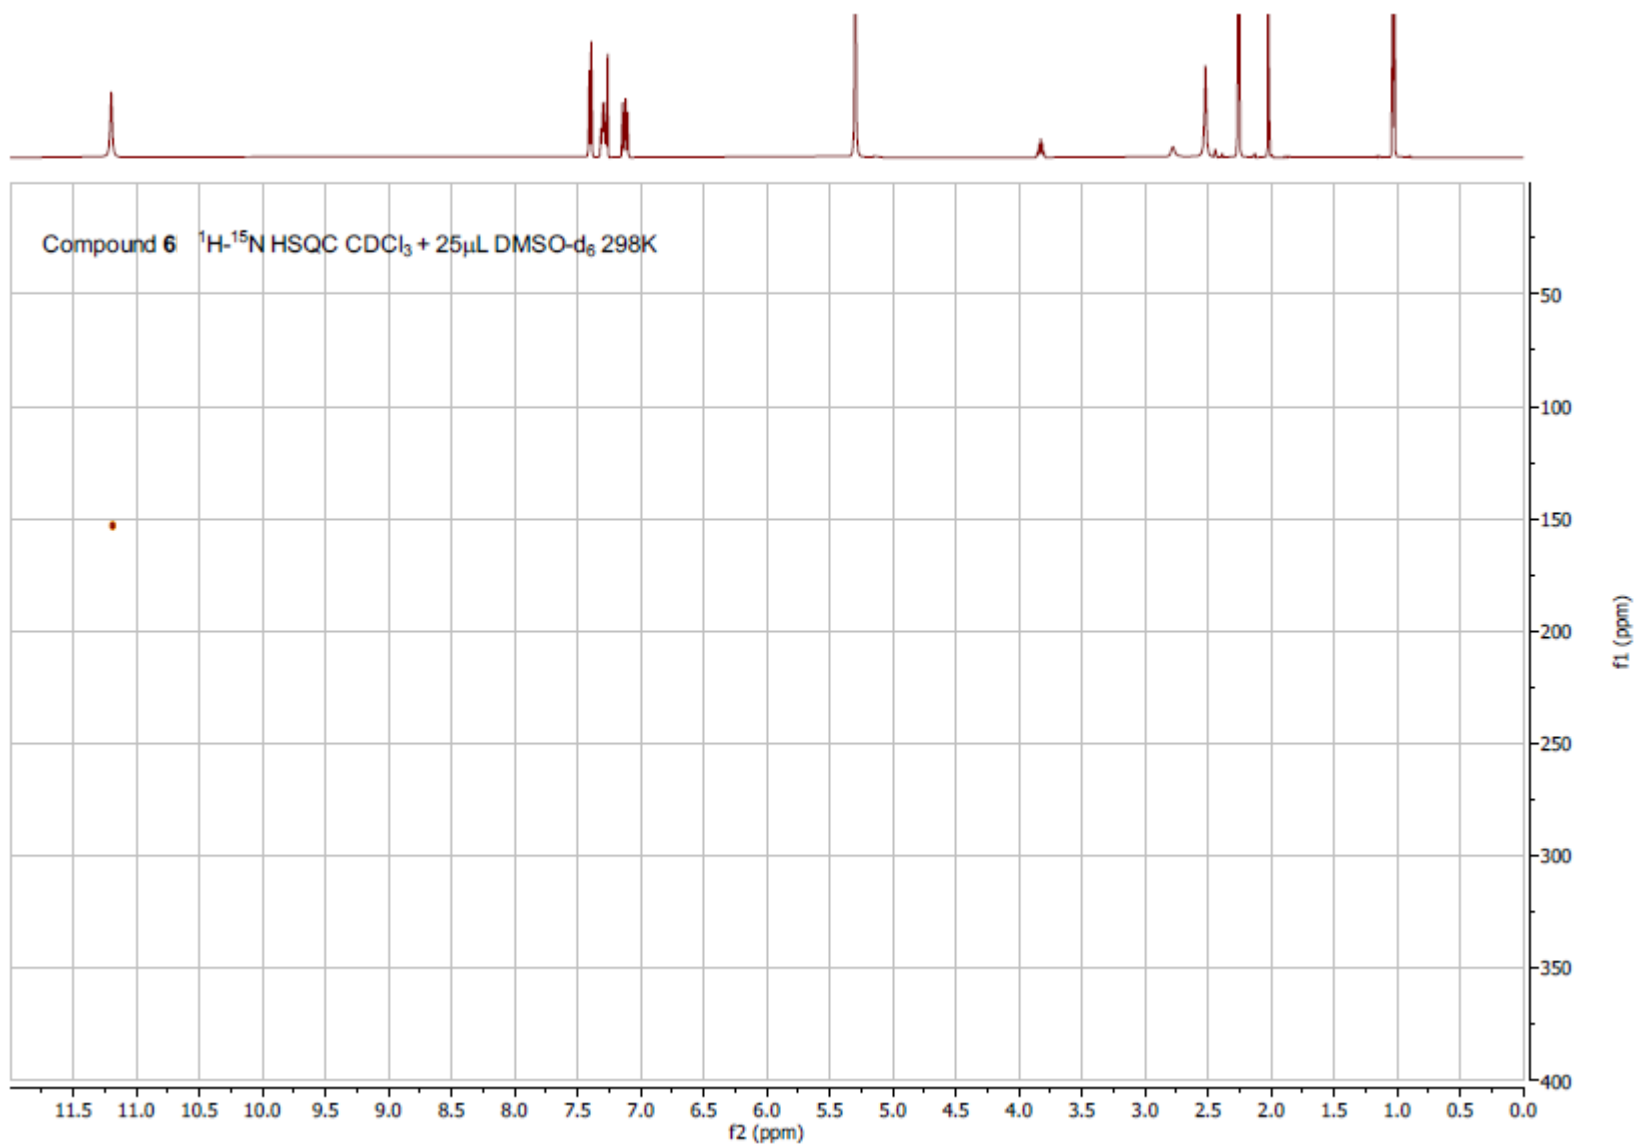

Figure S14.  $^1\text{H}$ - $^{15}\text{N}$  HSQC of compound 6



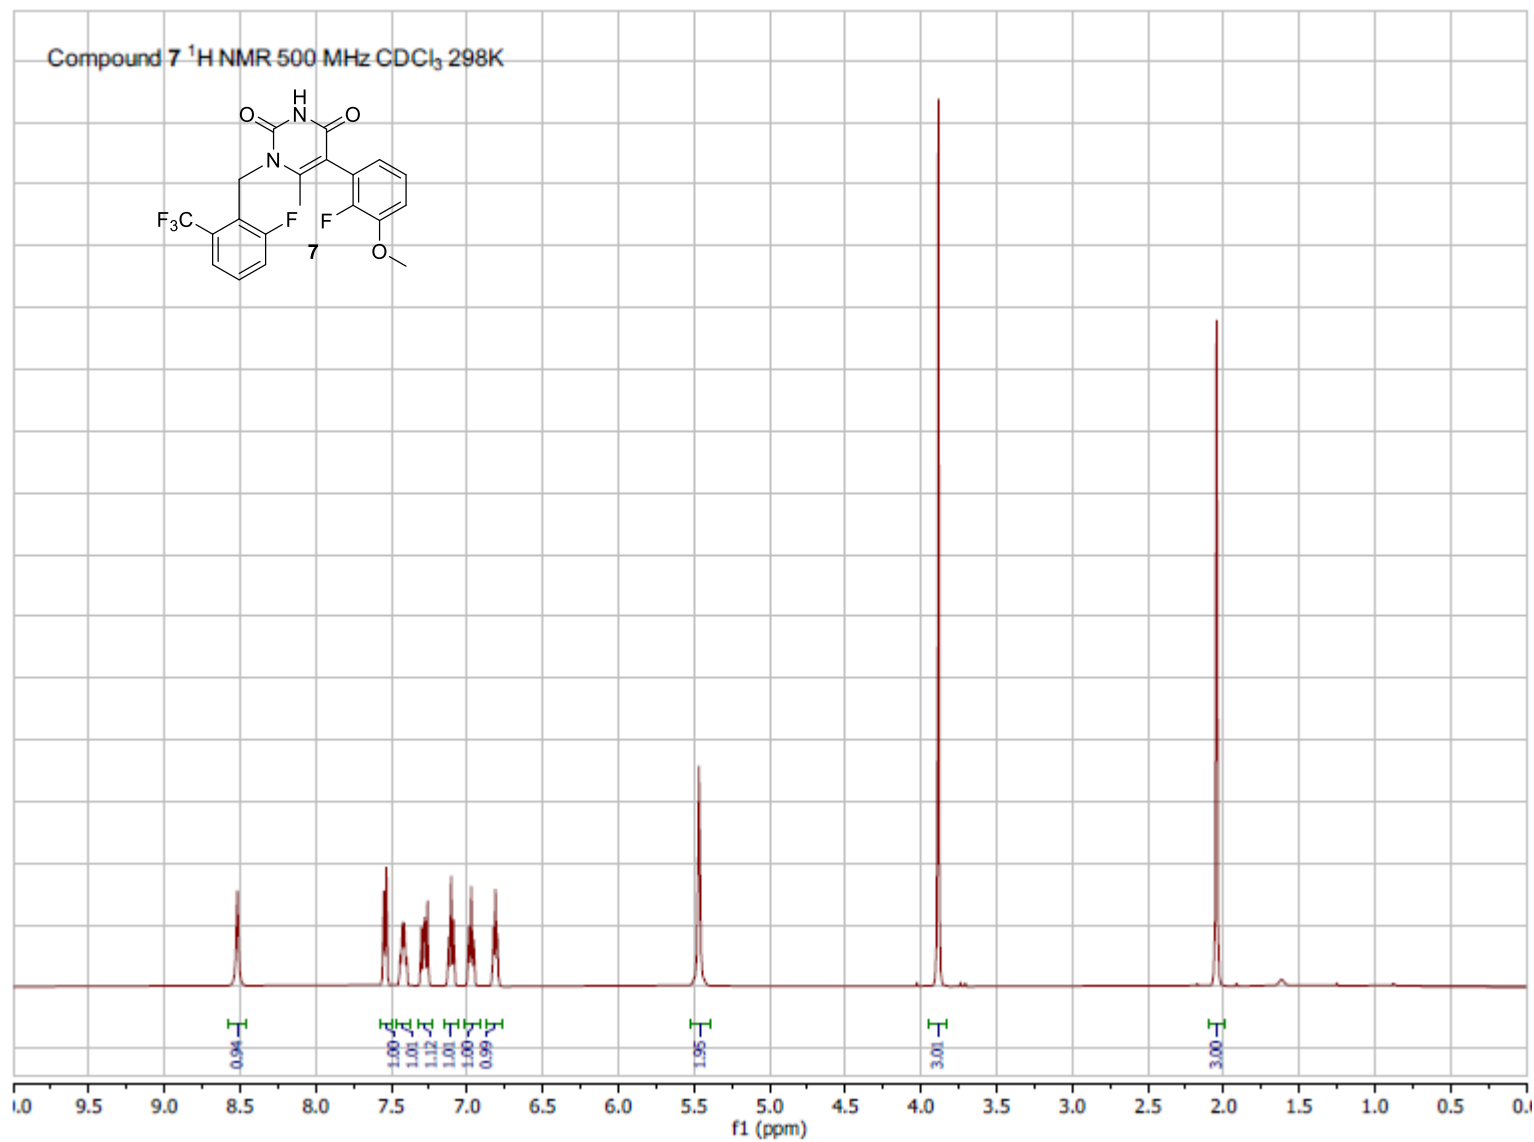

Figure S15.  $^1\text{H}$  NMR of compound **7**

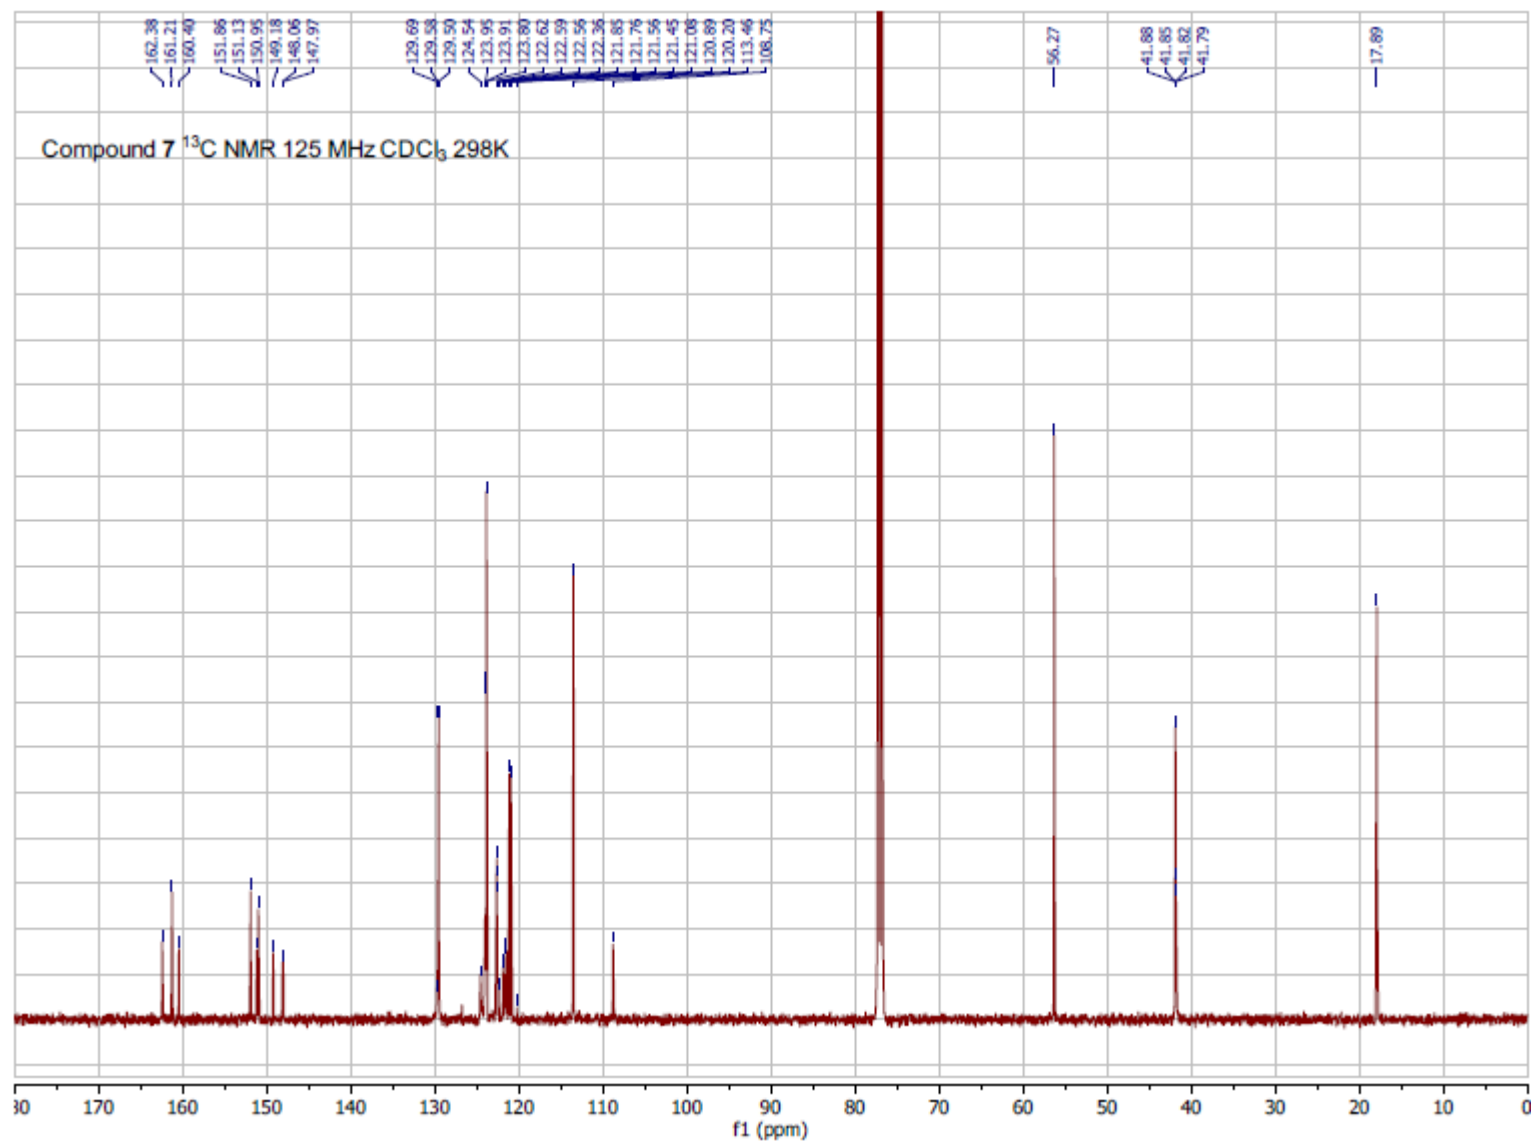

Figure S16.  $^{13}\text{C}$  NMR of compound 7

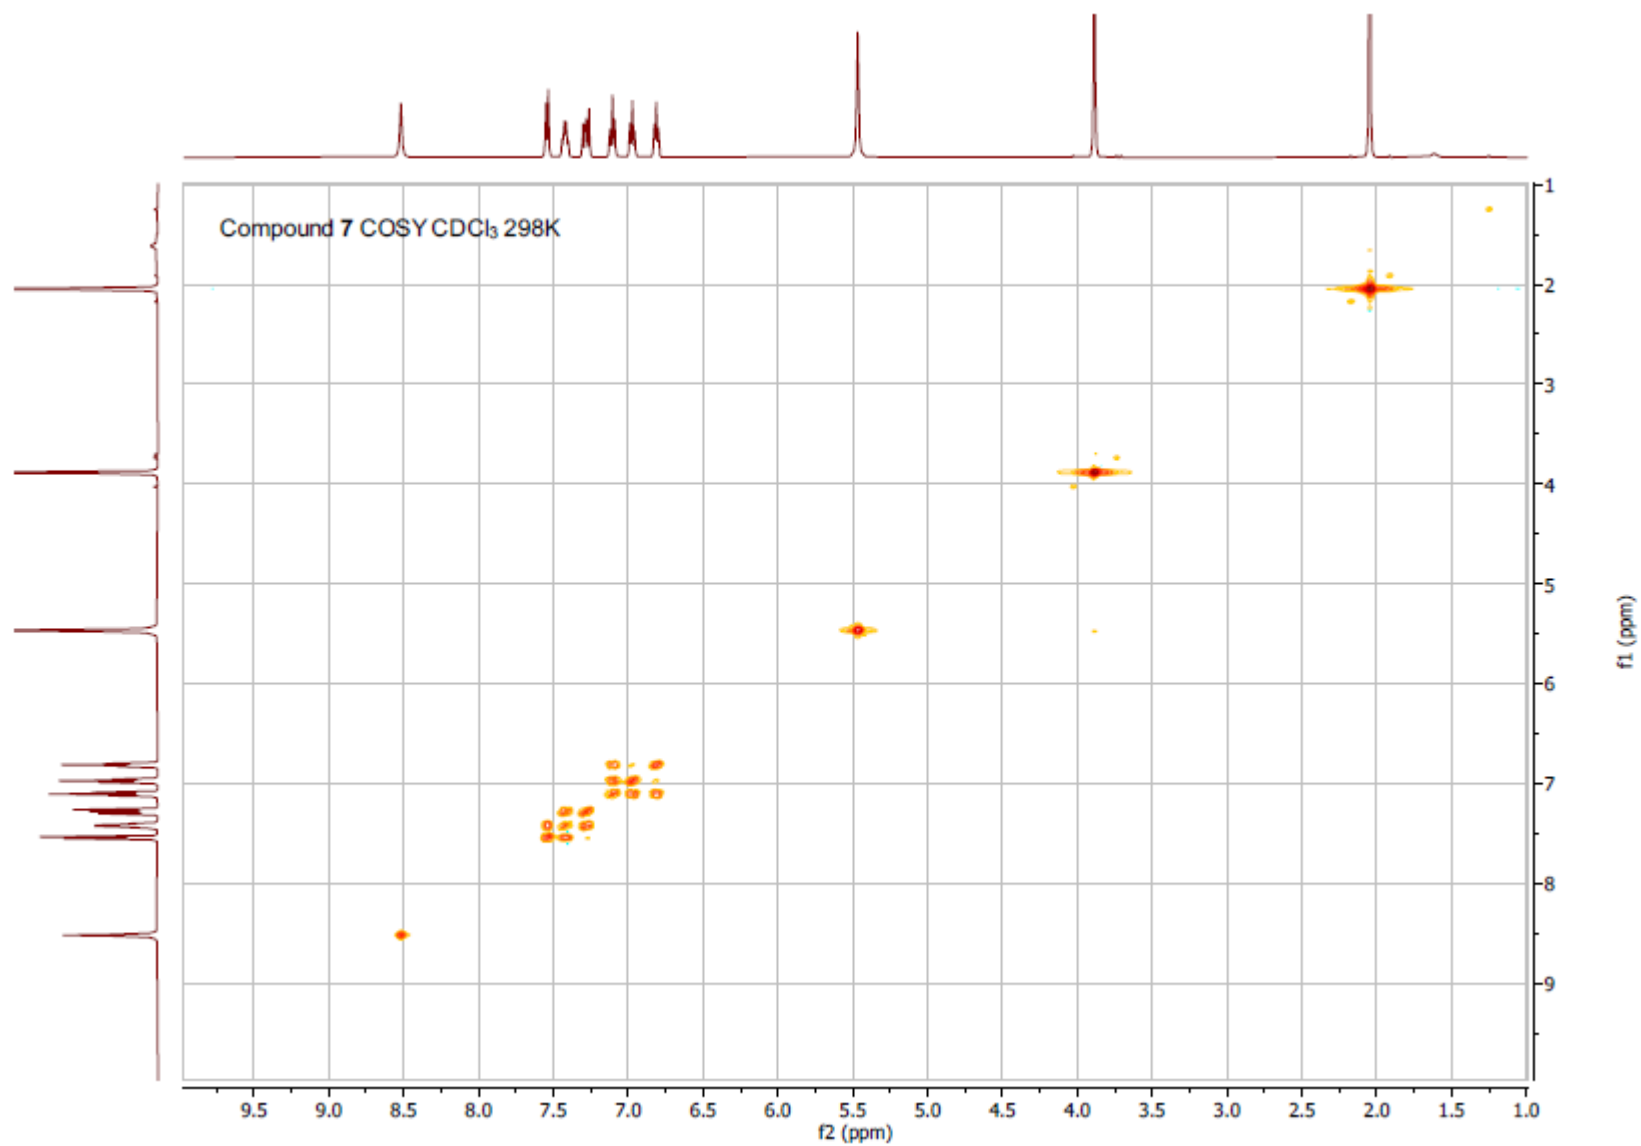

Figure S17. COSY of compound 7

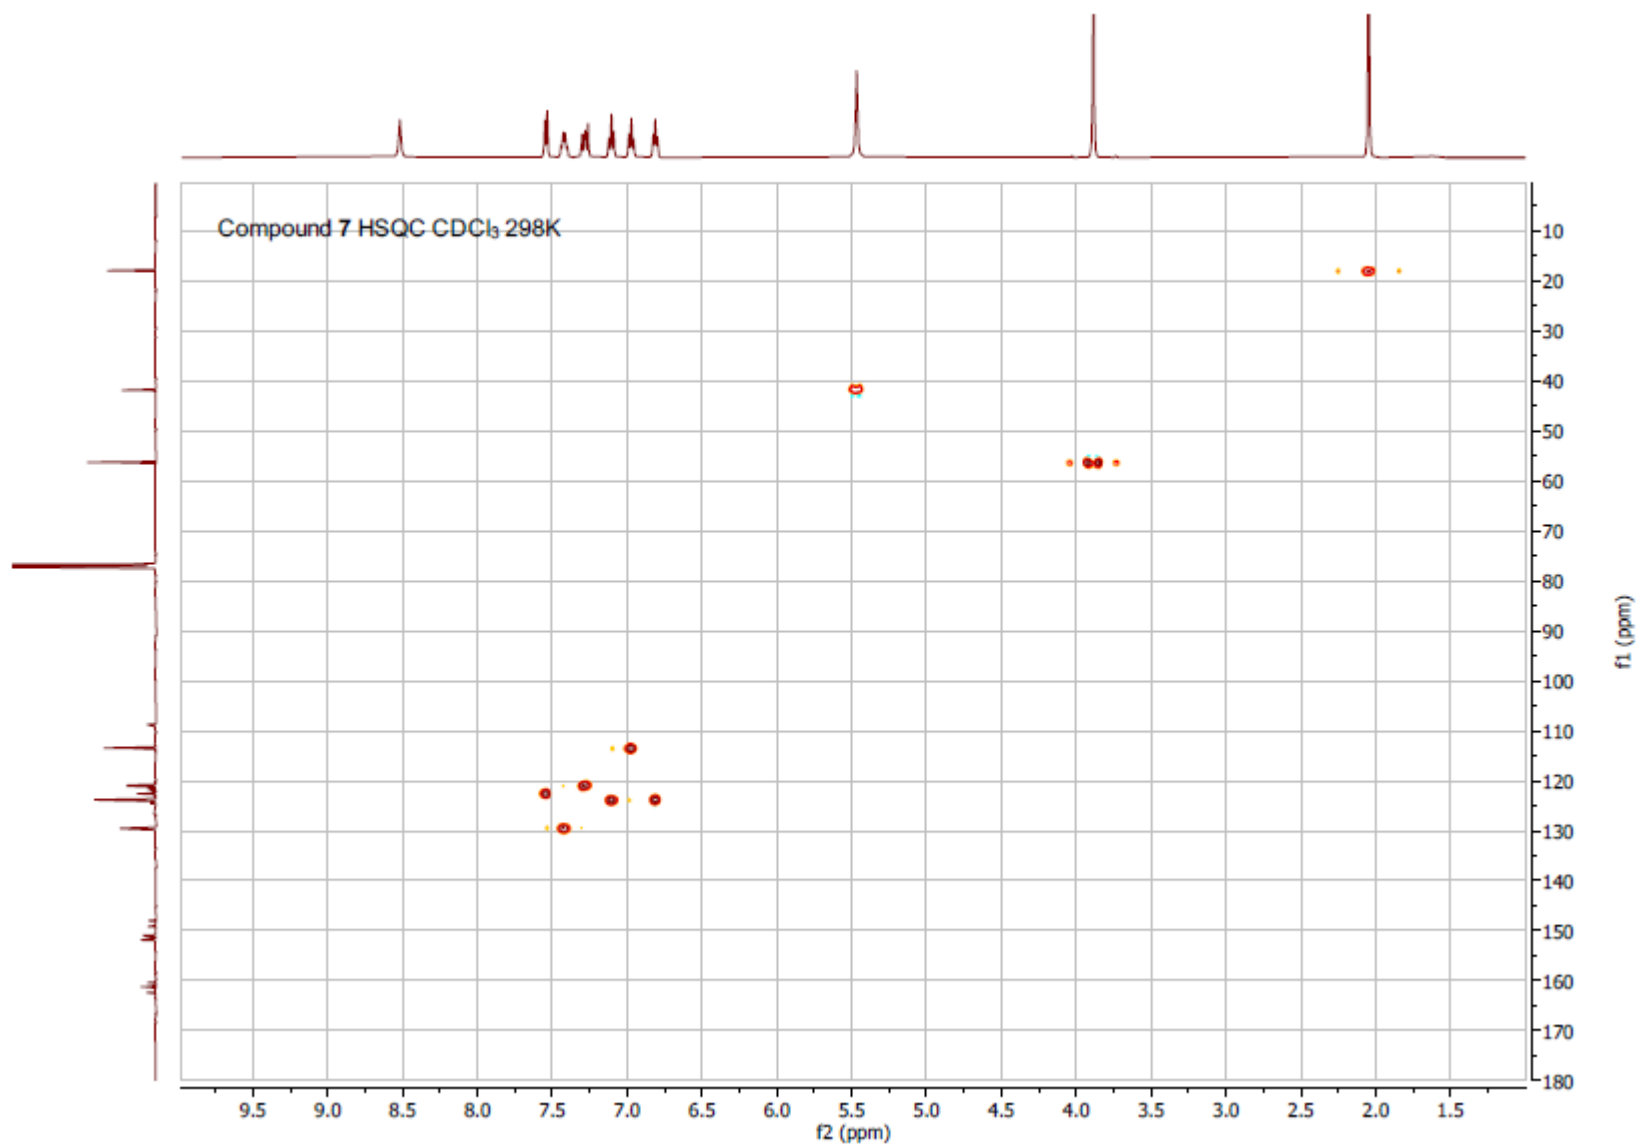

**Figure S18.**  $^1\text{H}$ - $^{13}\text{C}$  HSQC of compound 7

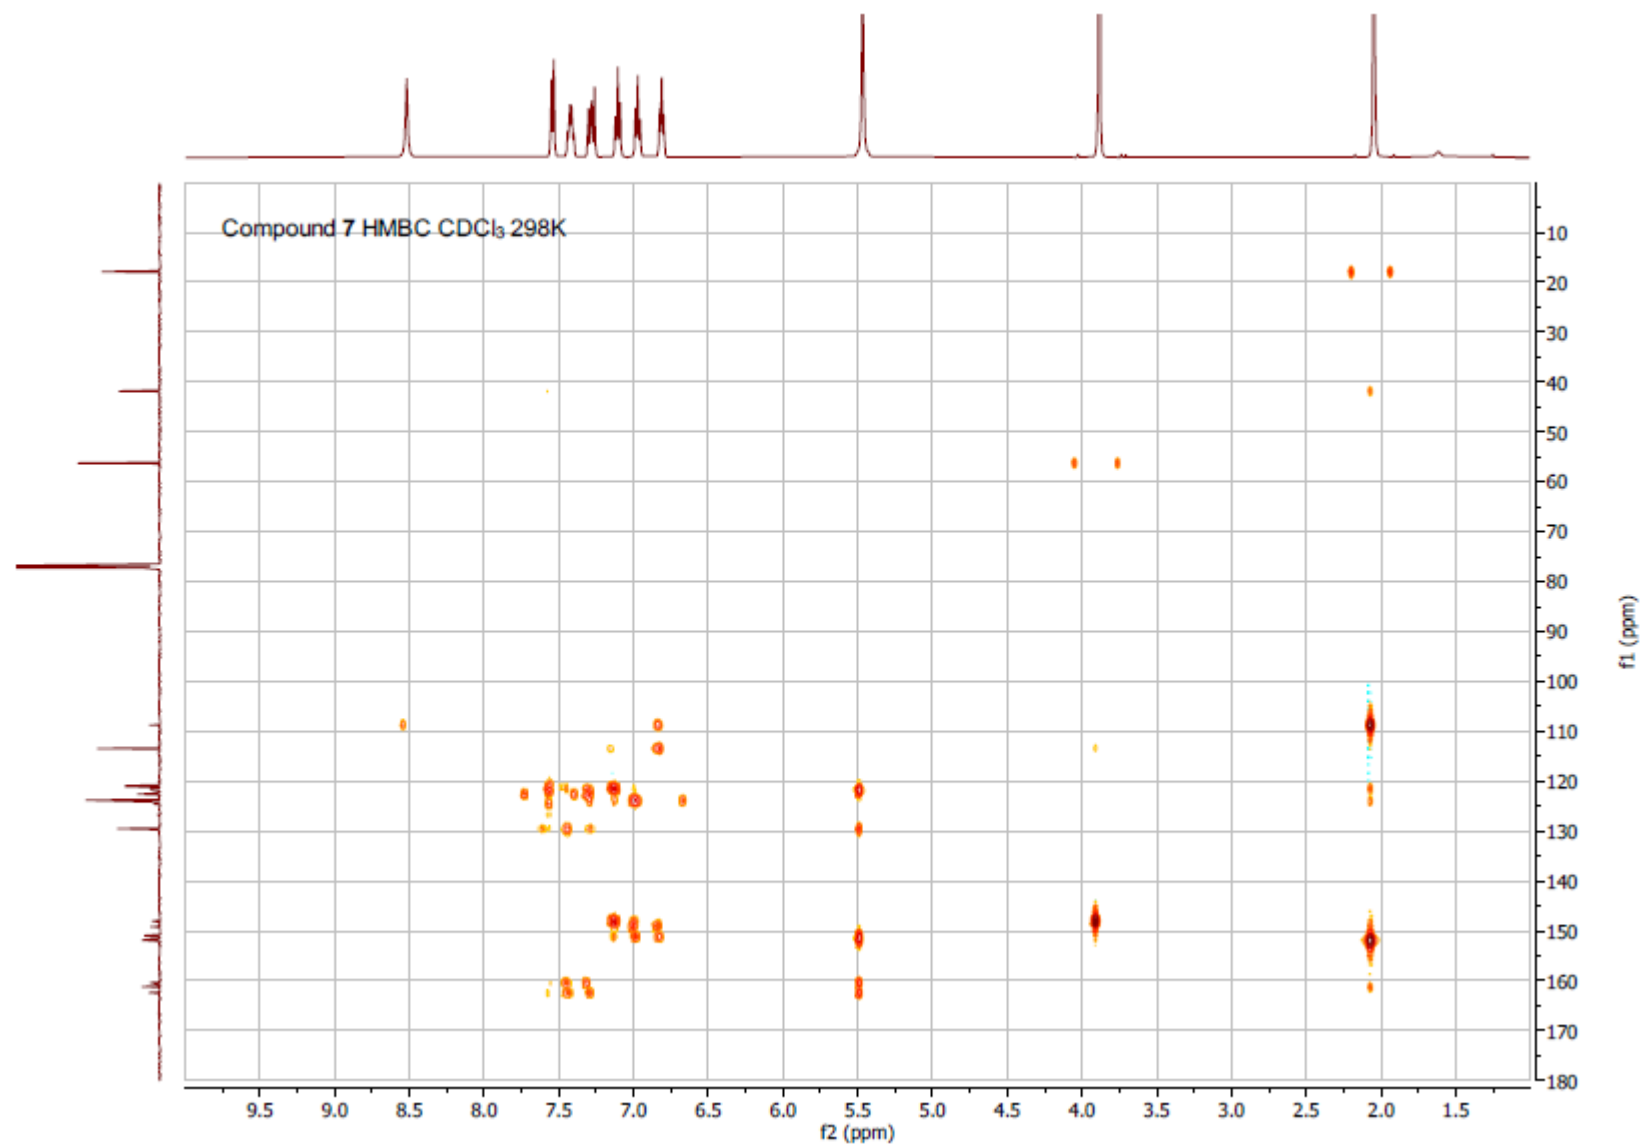

**Figure S19.** <sup>1</sup>H-<sup>13</sup>C HMBC of compound 7

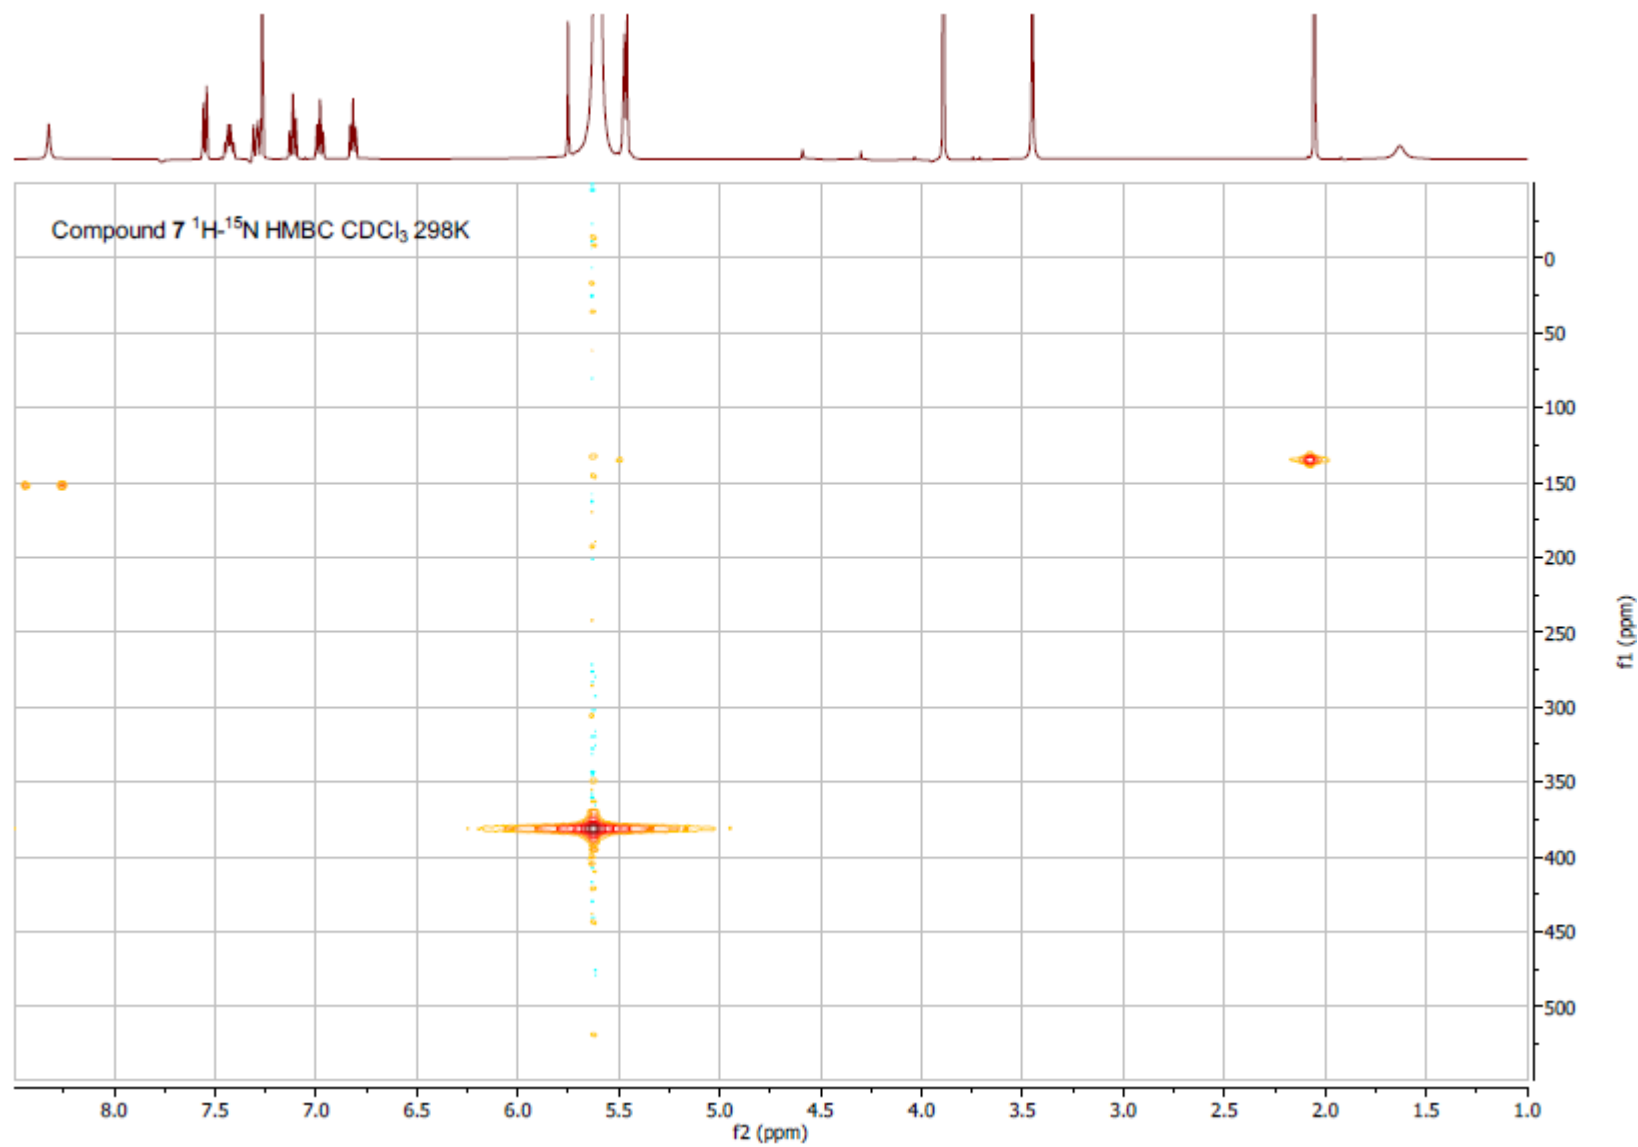

**Figure S20.**  $^1\text{H}$ - $^{15}\text{N}$  HMBC of compound 7

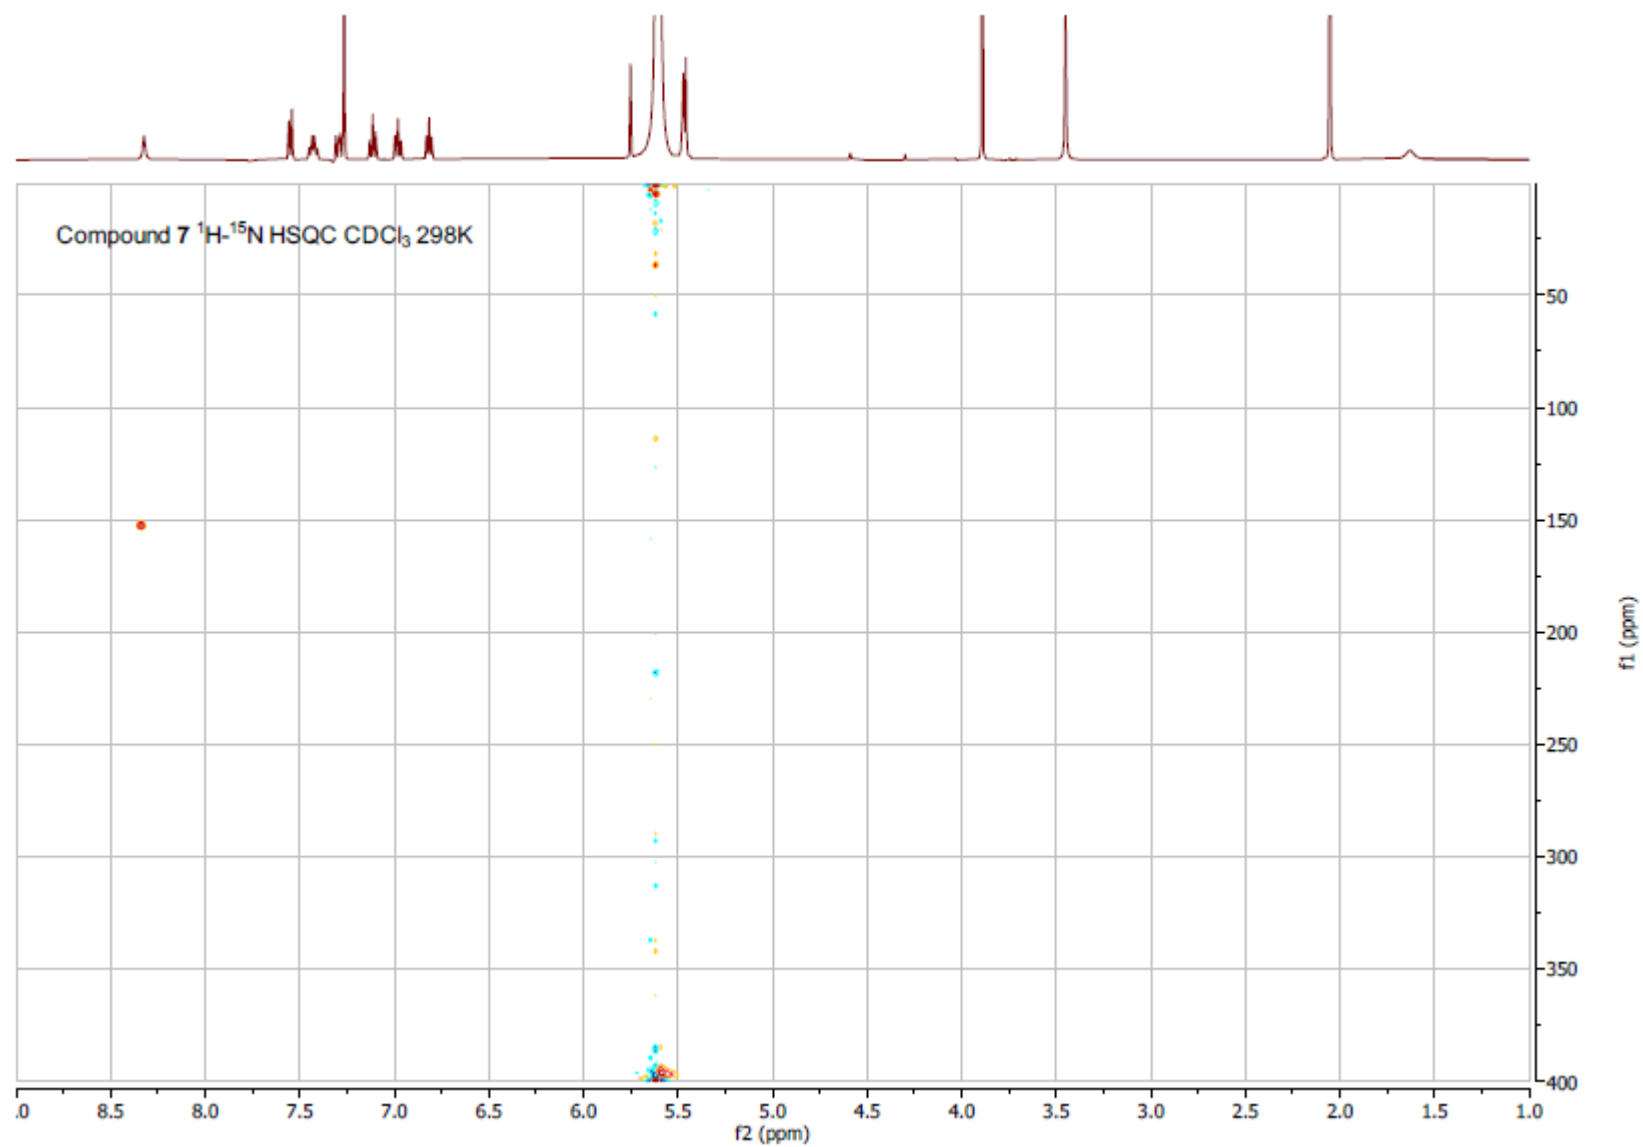

**Figure S21.**  $^1\text{H}$ - $^{15}\text{N}$  HSQC of compound 7

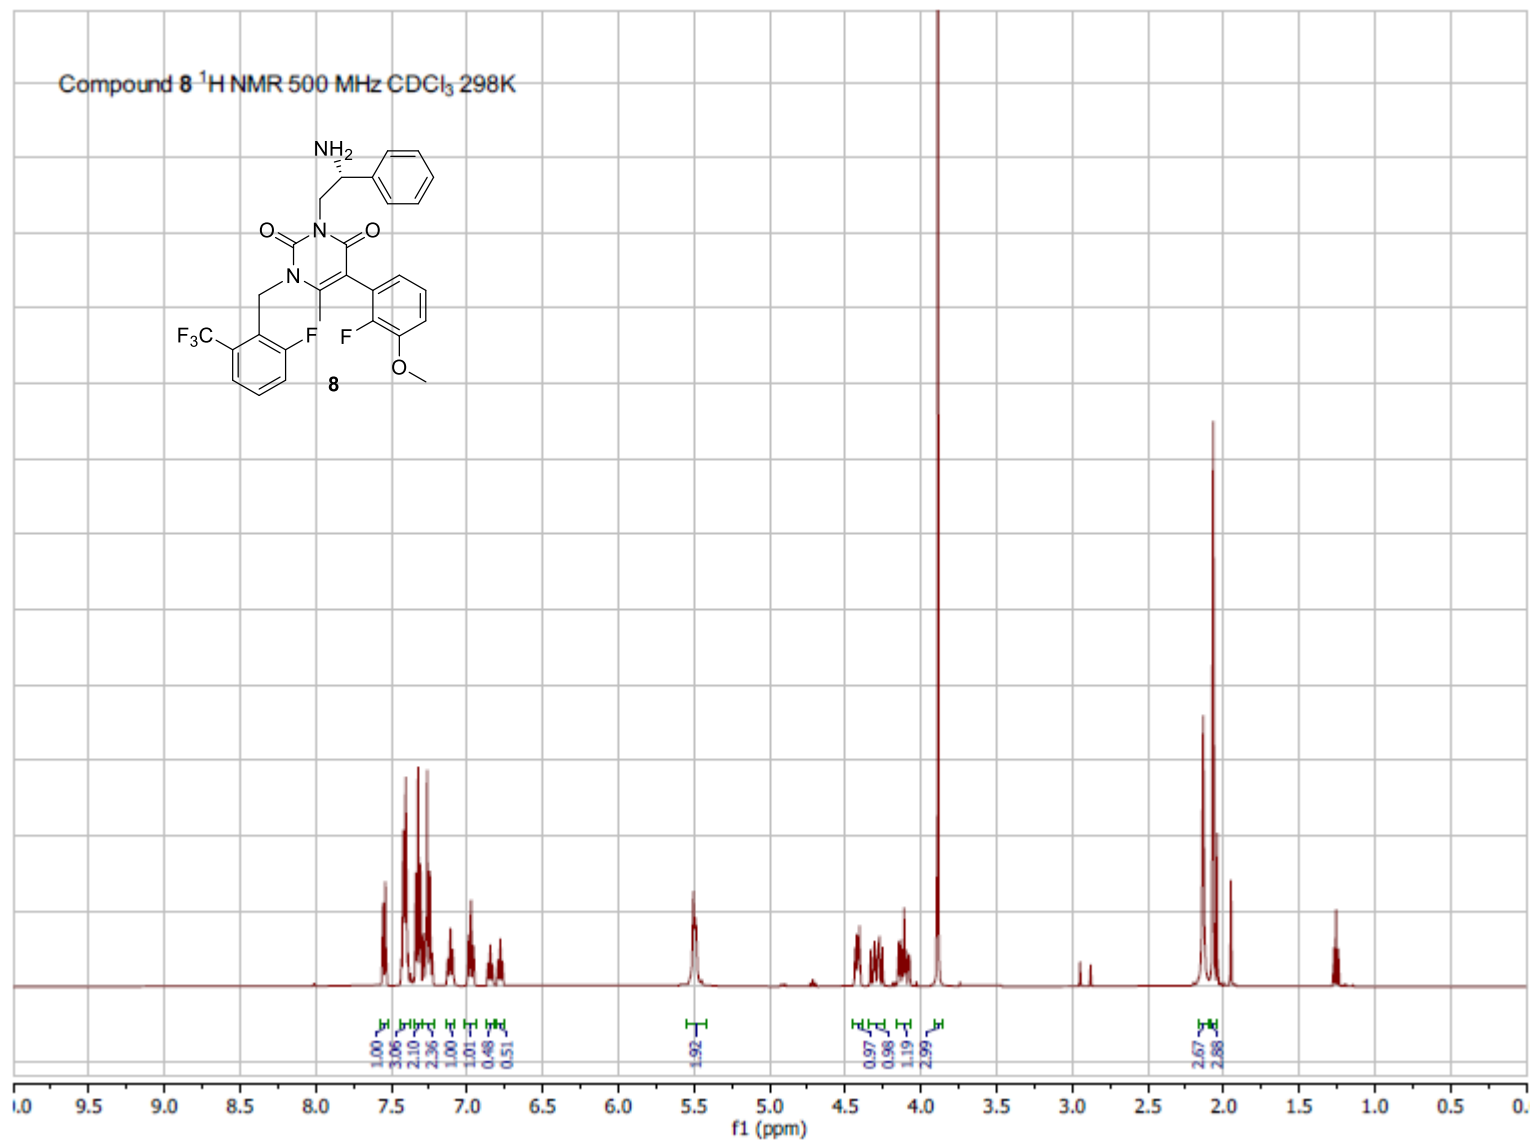

Figure S22.  $^1\text{H}$  NMR of compound **8**



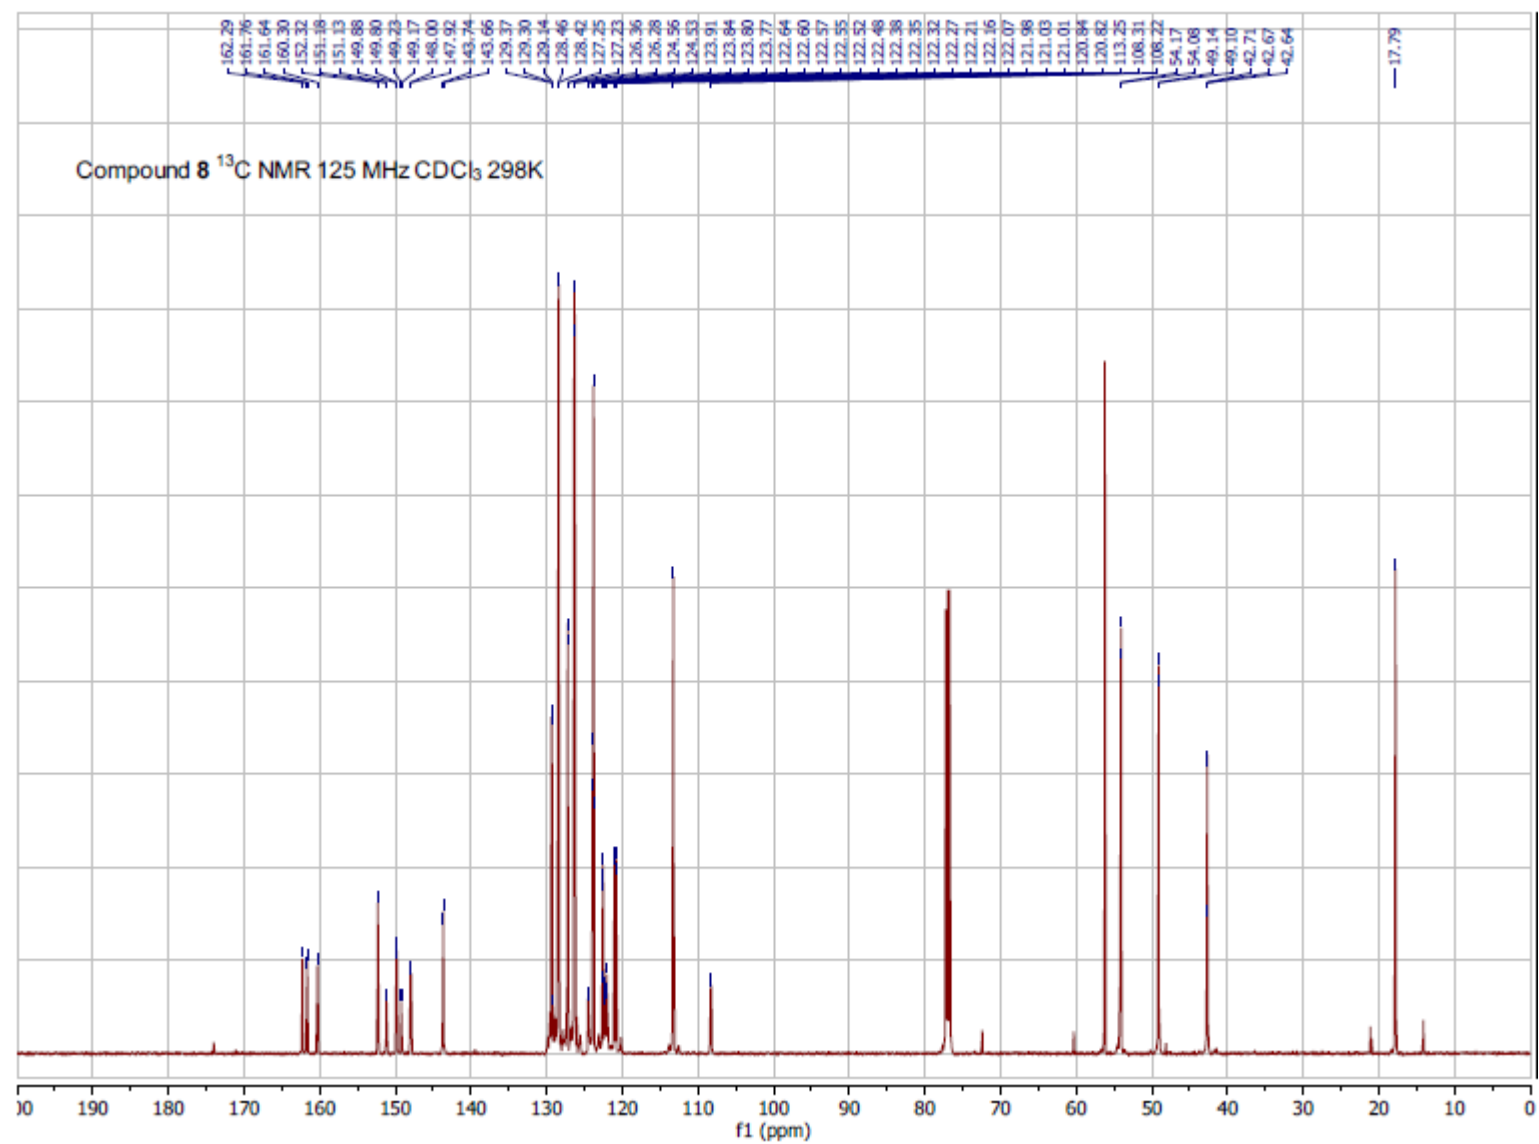

Figure S23.  $^{13}\text{C}$  NMR of compound 8

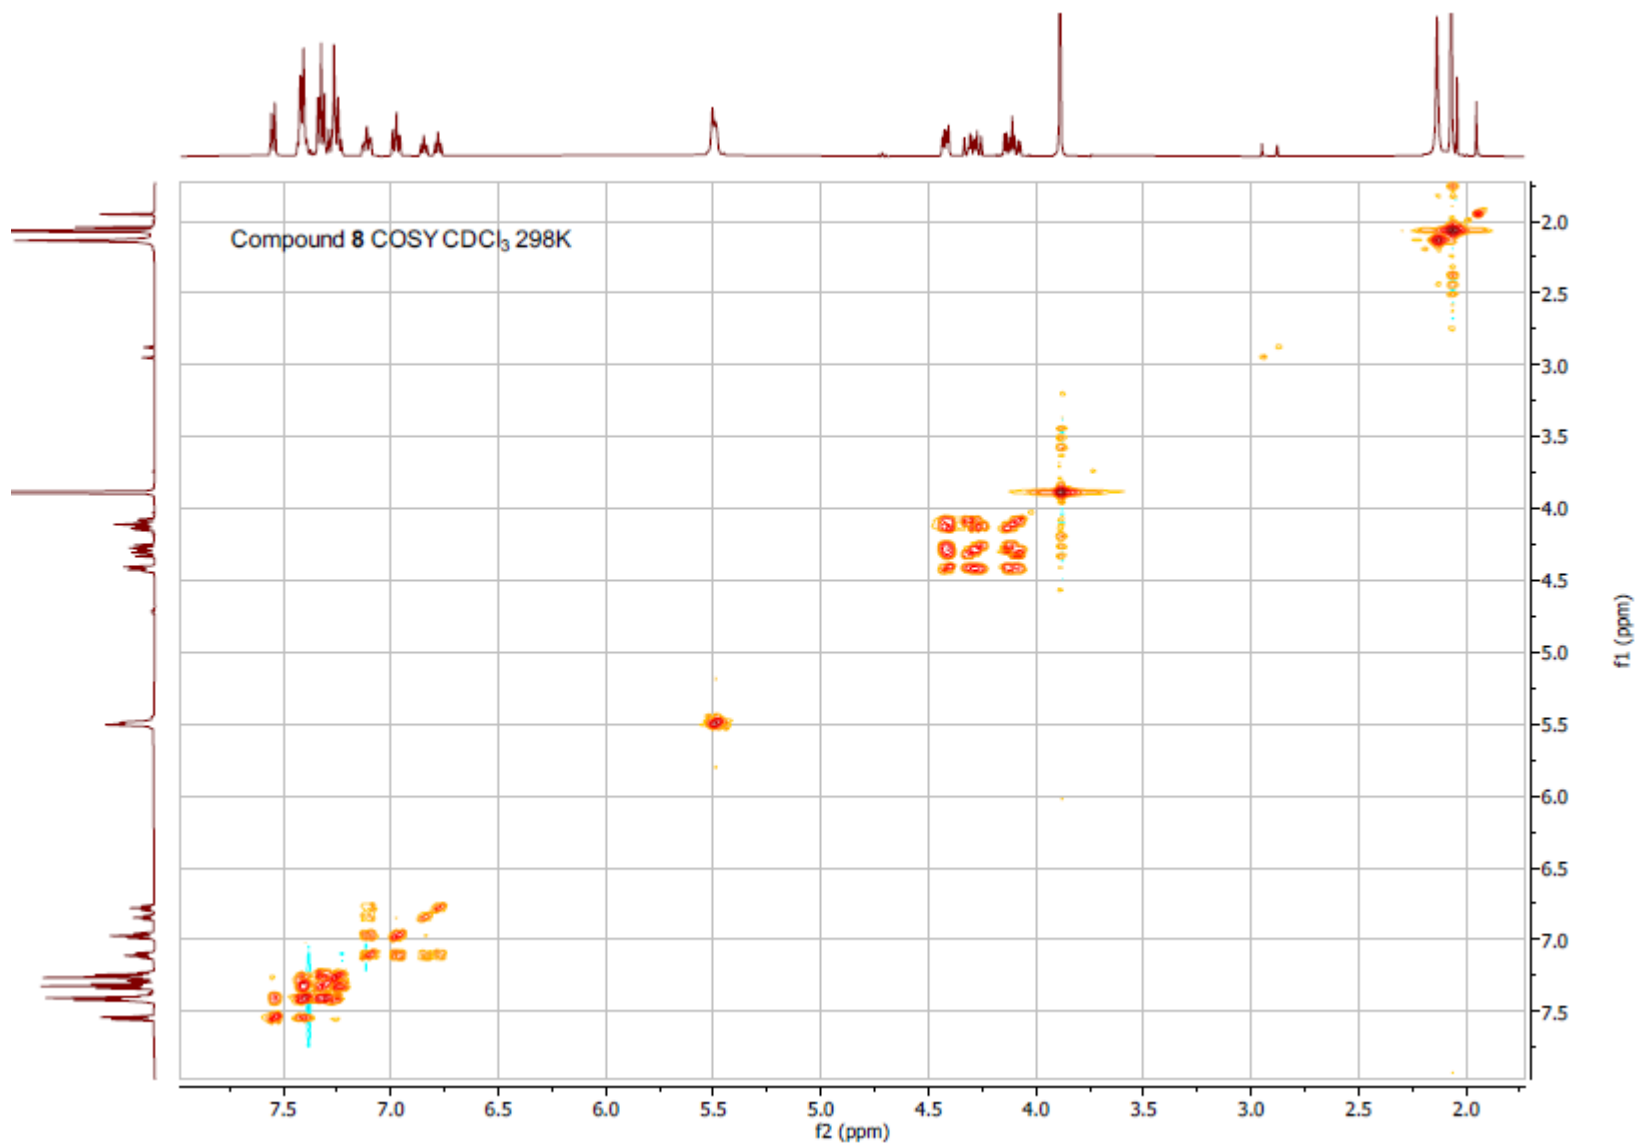

Figure S24. COSY of compound 8

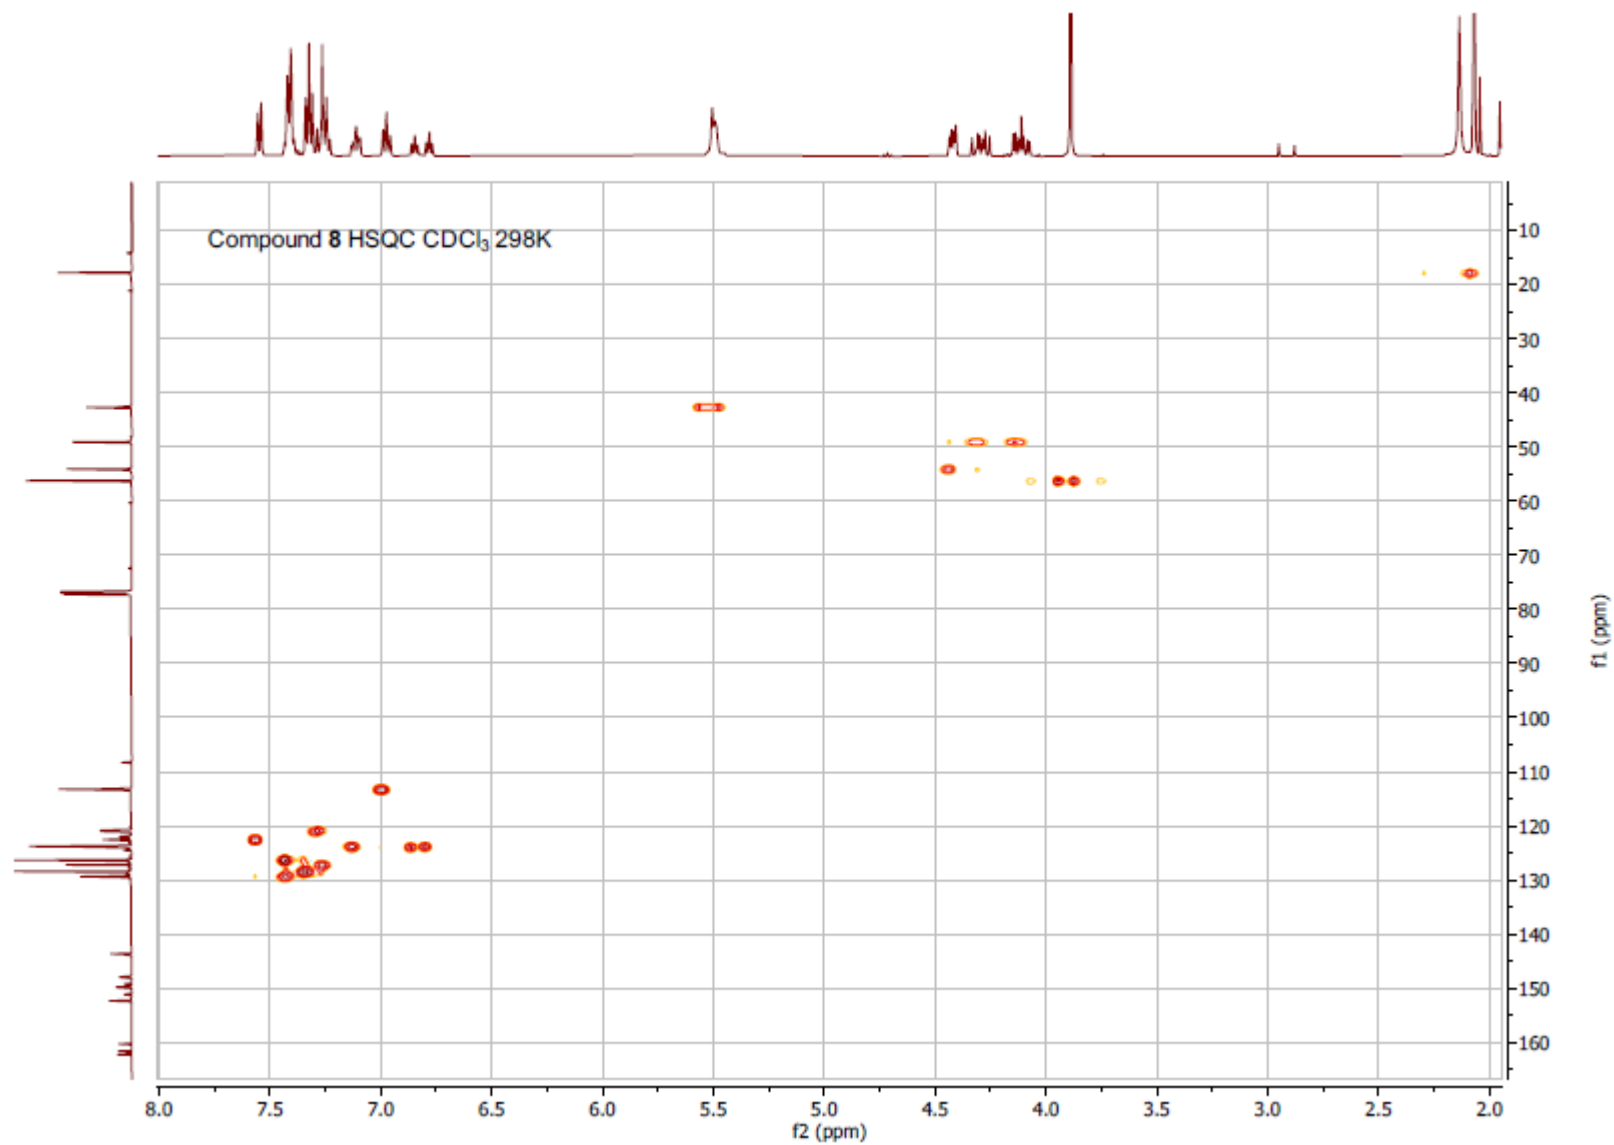

**Figure S25.** <sup>1</sup>H-<sup>13</sup>C HSQC of compound 8

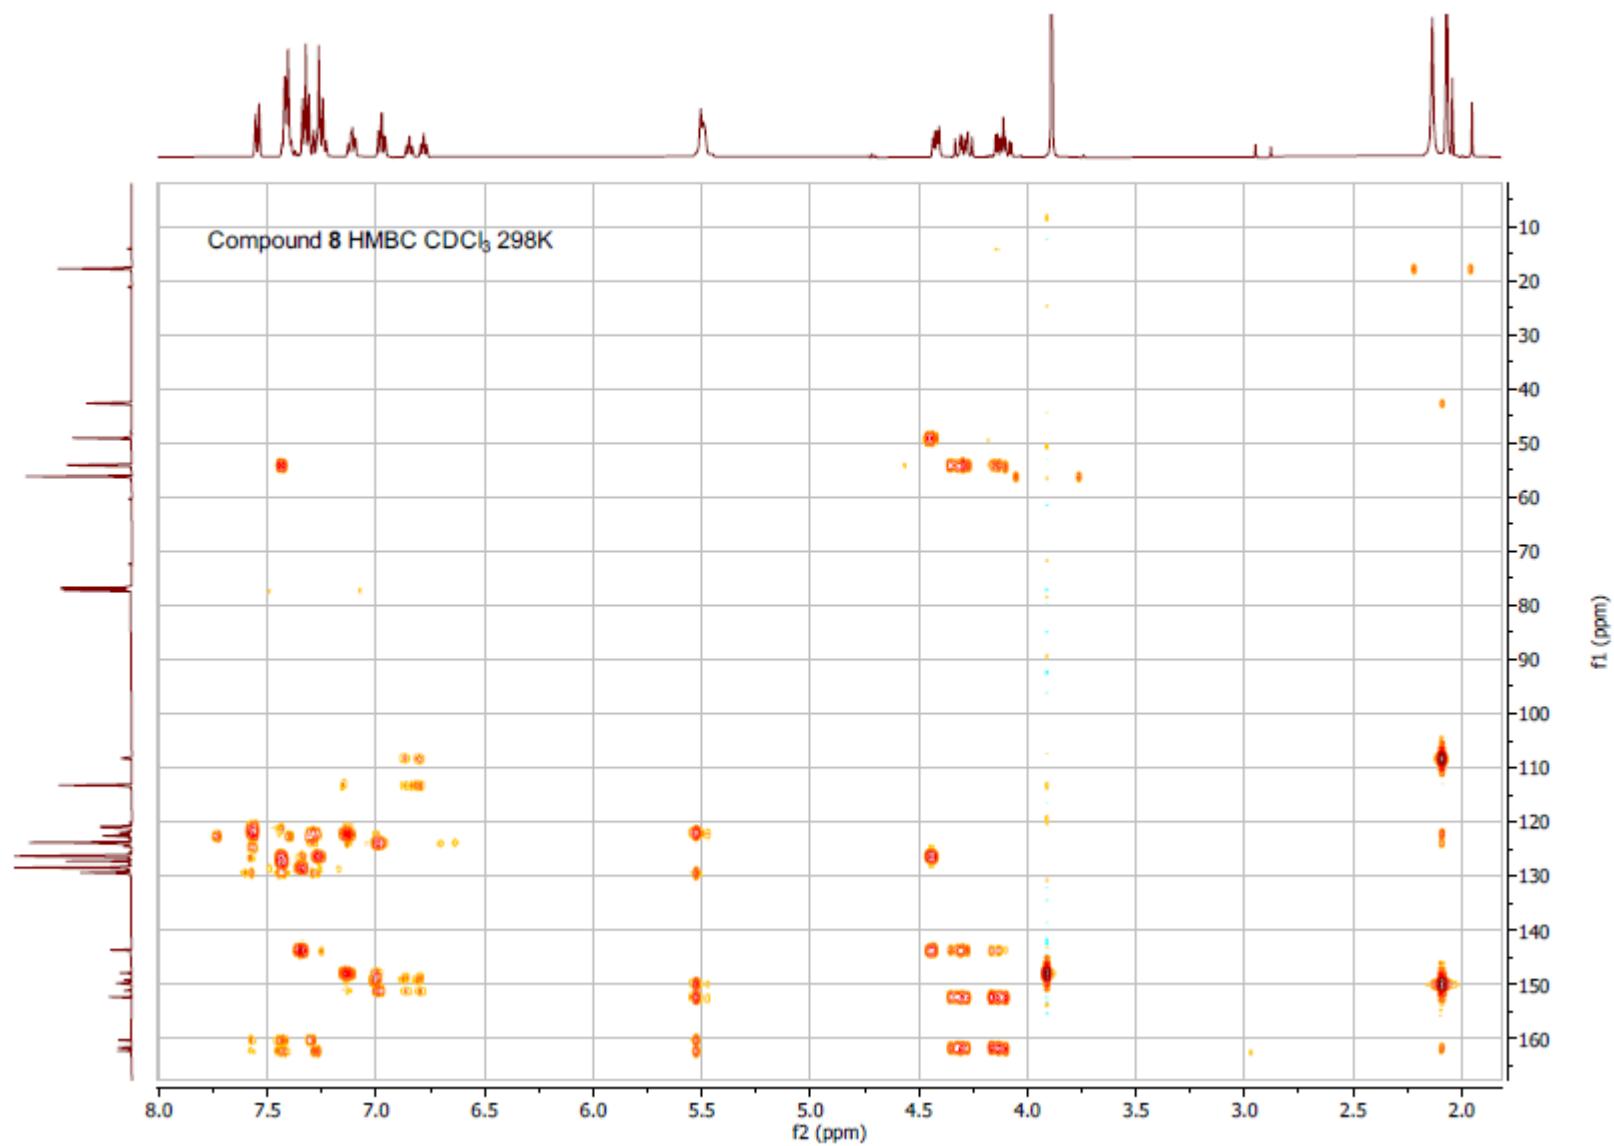

**Figure S26.** <sup>1</sup>H-<sup>13</sup>C HMBC of compound 8

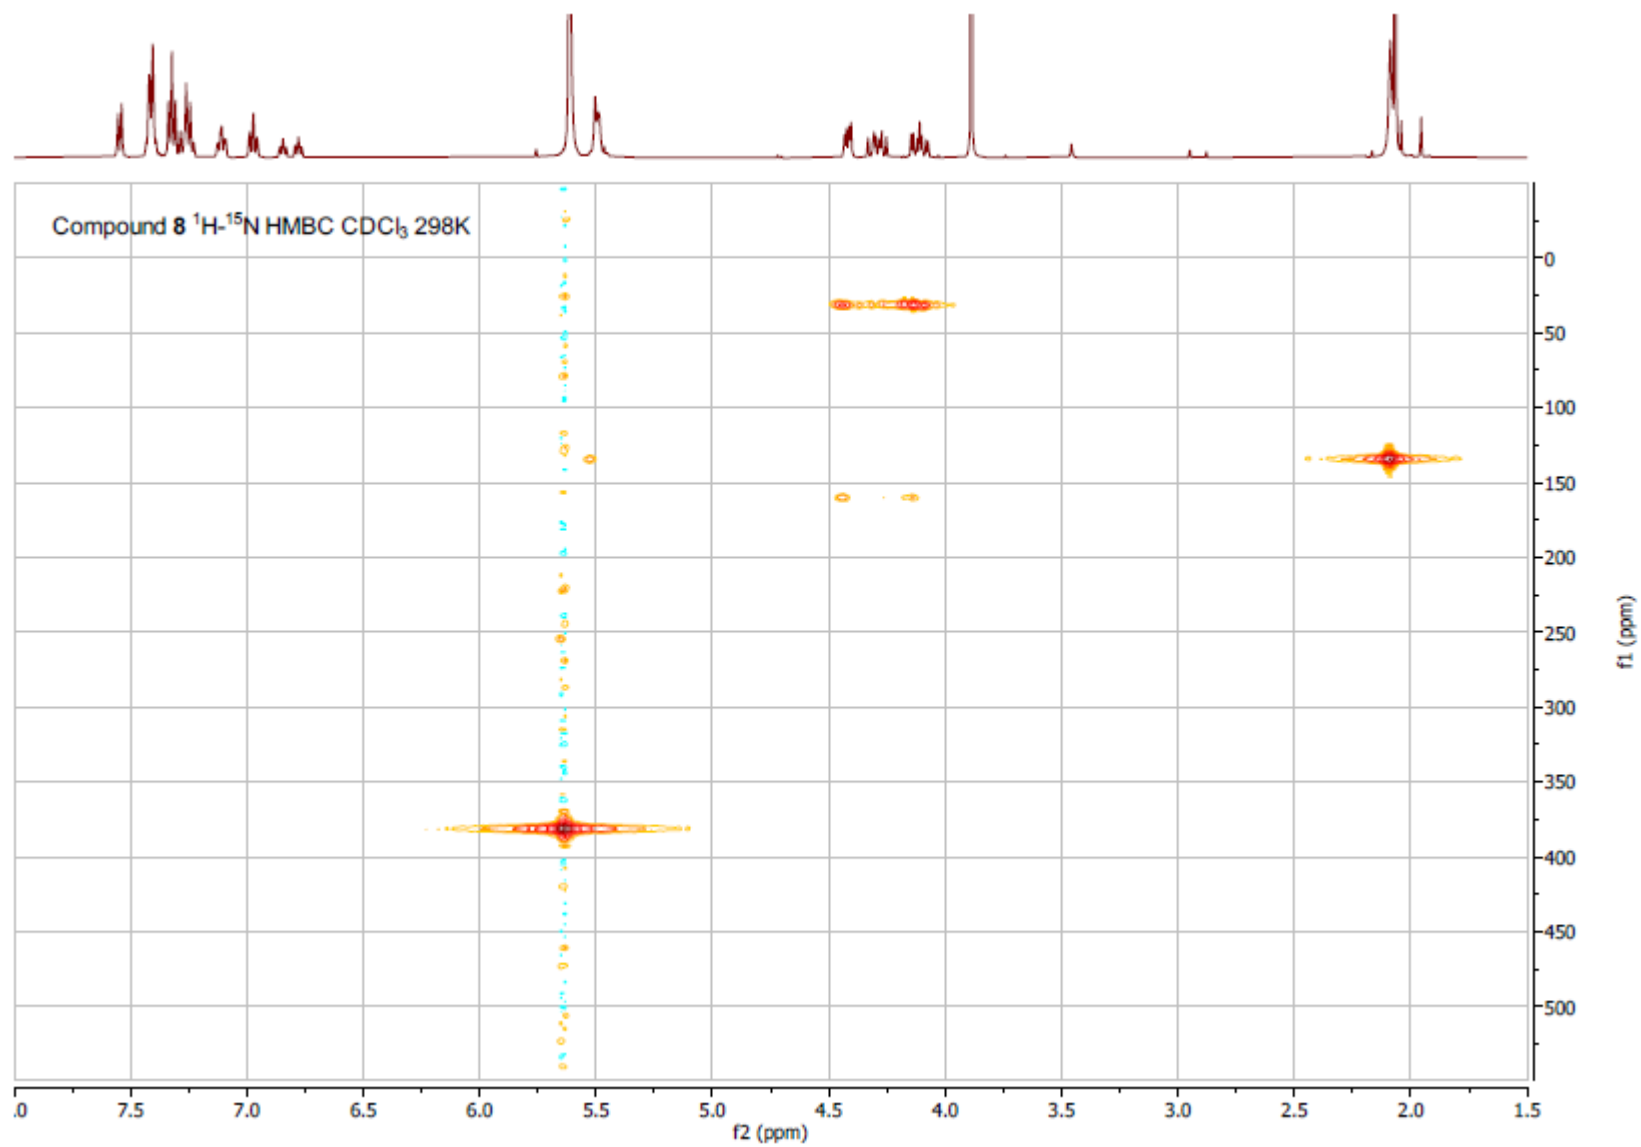

**Figure S27.**  $^1\text{H}$ - $^{15}\text{N}$  HMBC of compound 8

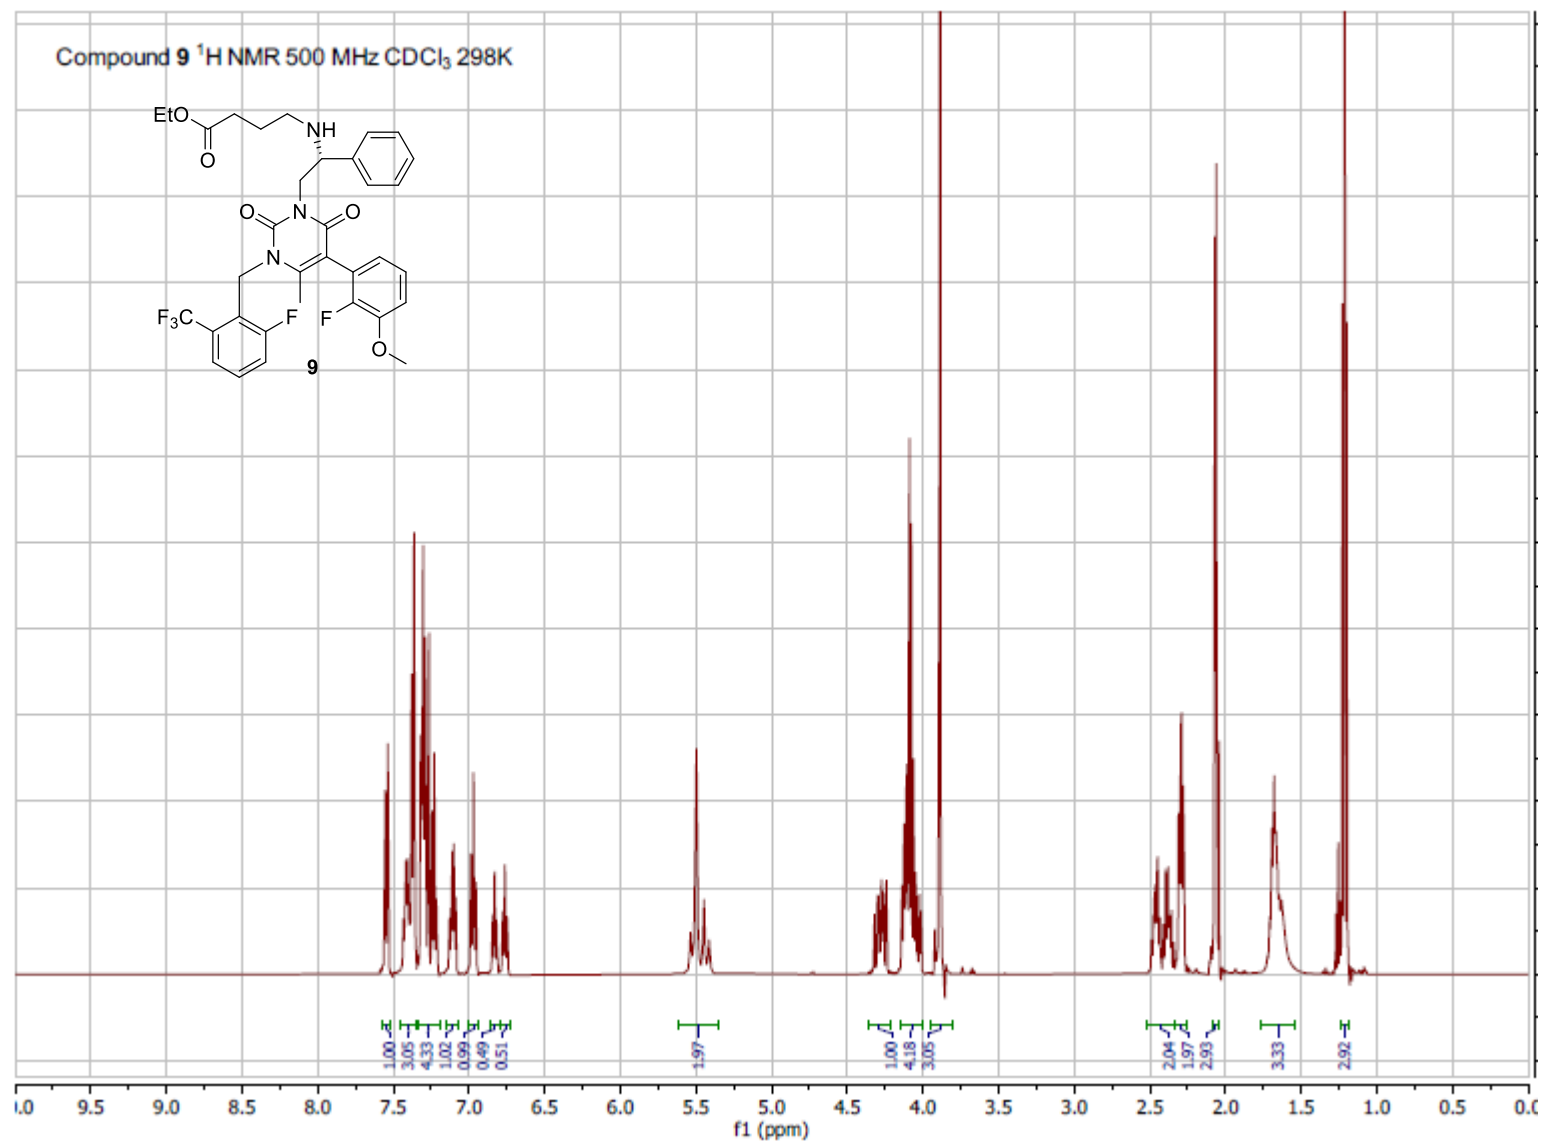

Figure S28.  $^1\text{H}$  NMR of compound **9**

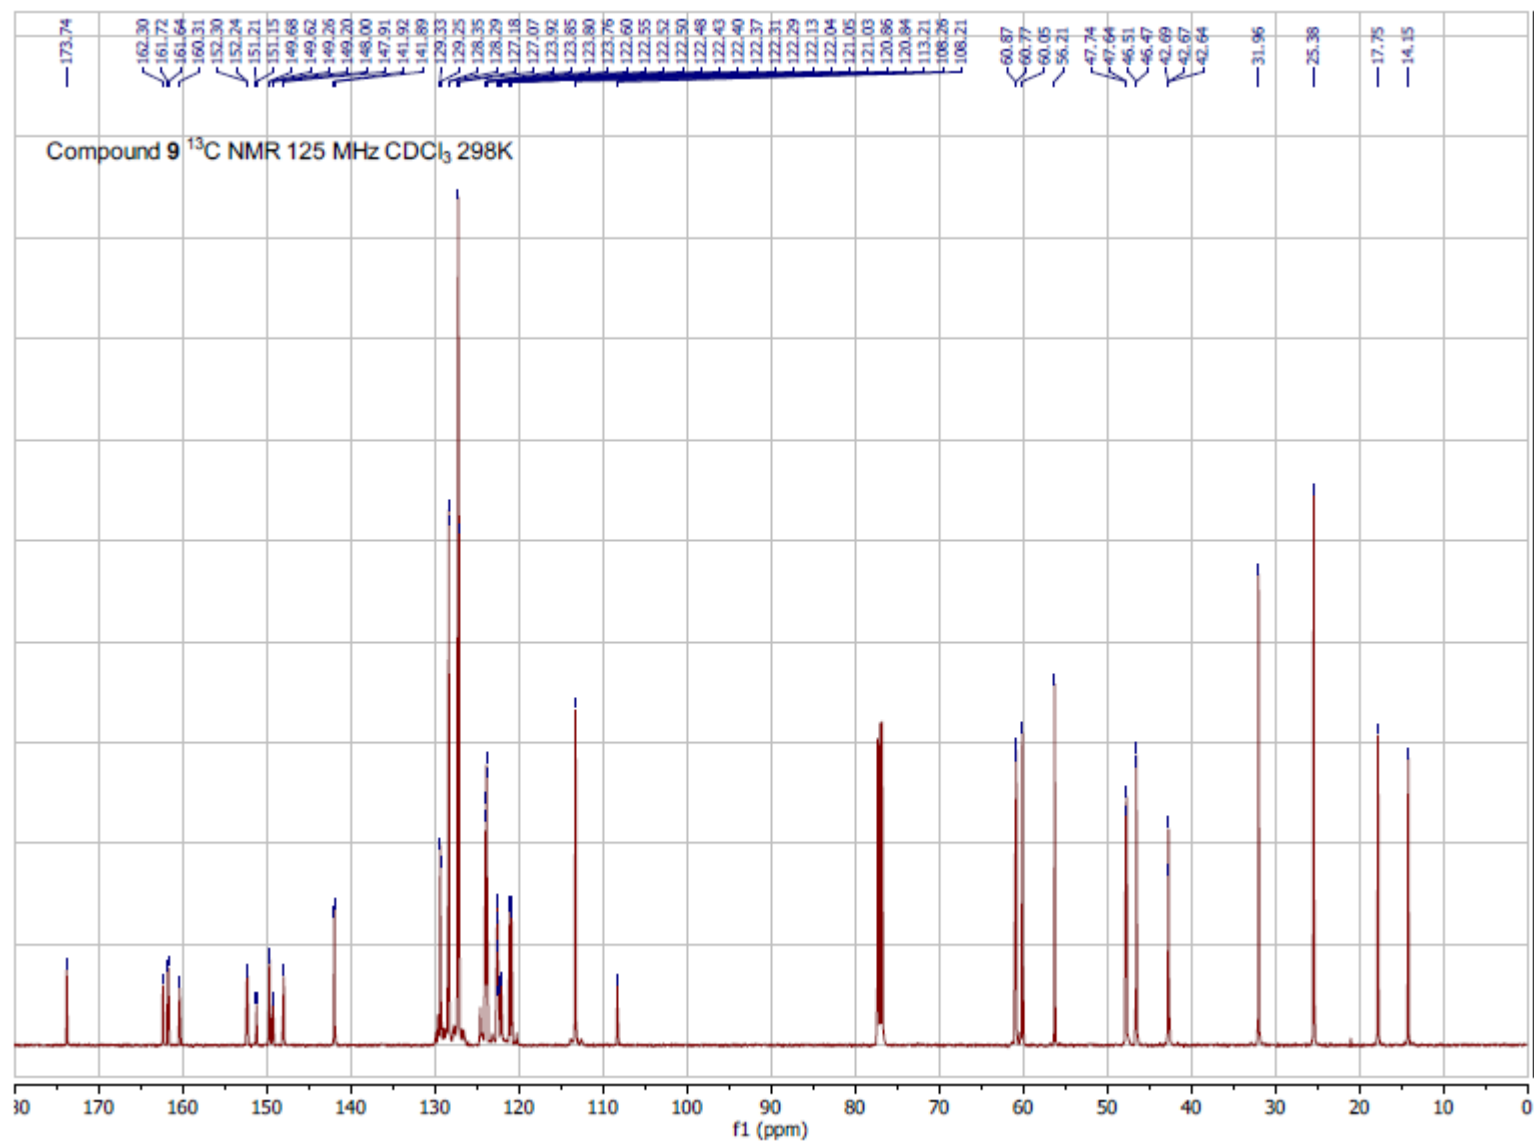

Figure S29.  $^{13}\text{C}$  NMR of compound 9

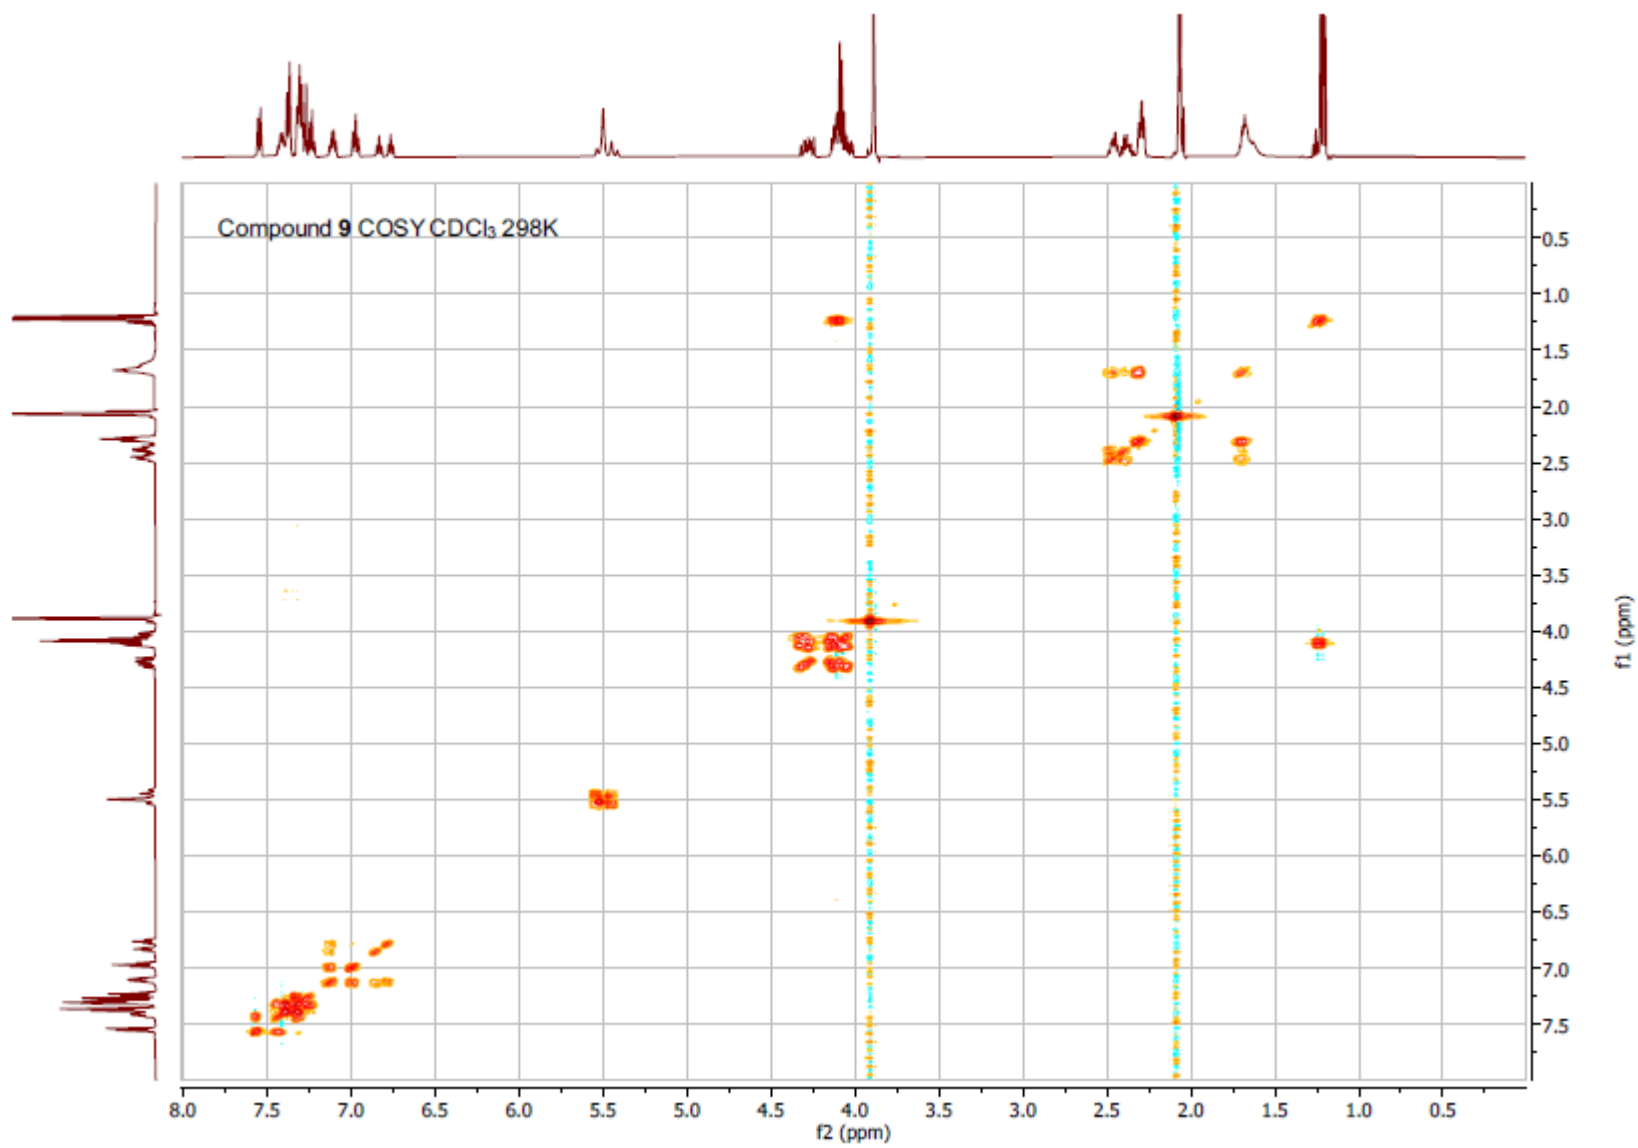

Figure S30. COSY of compound 9



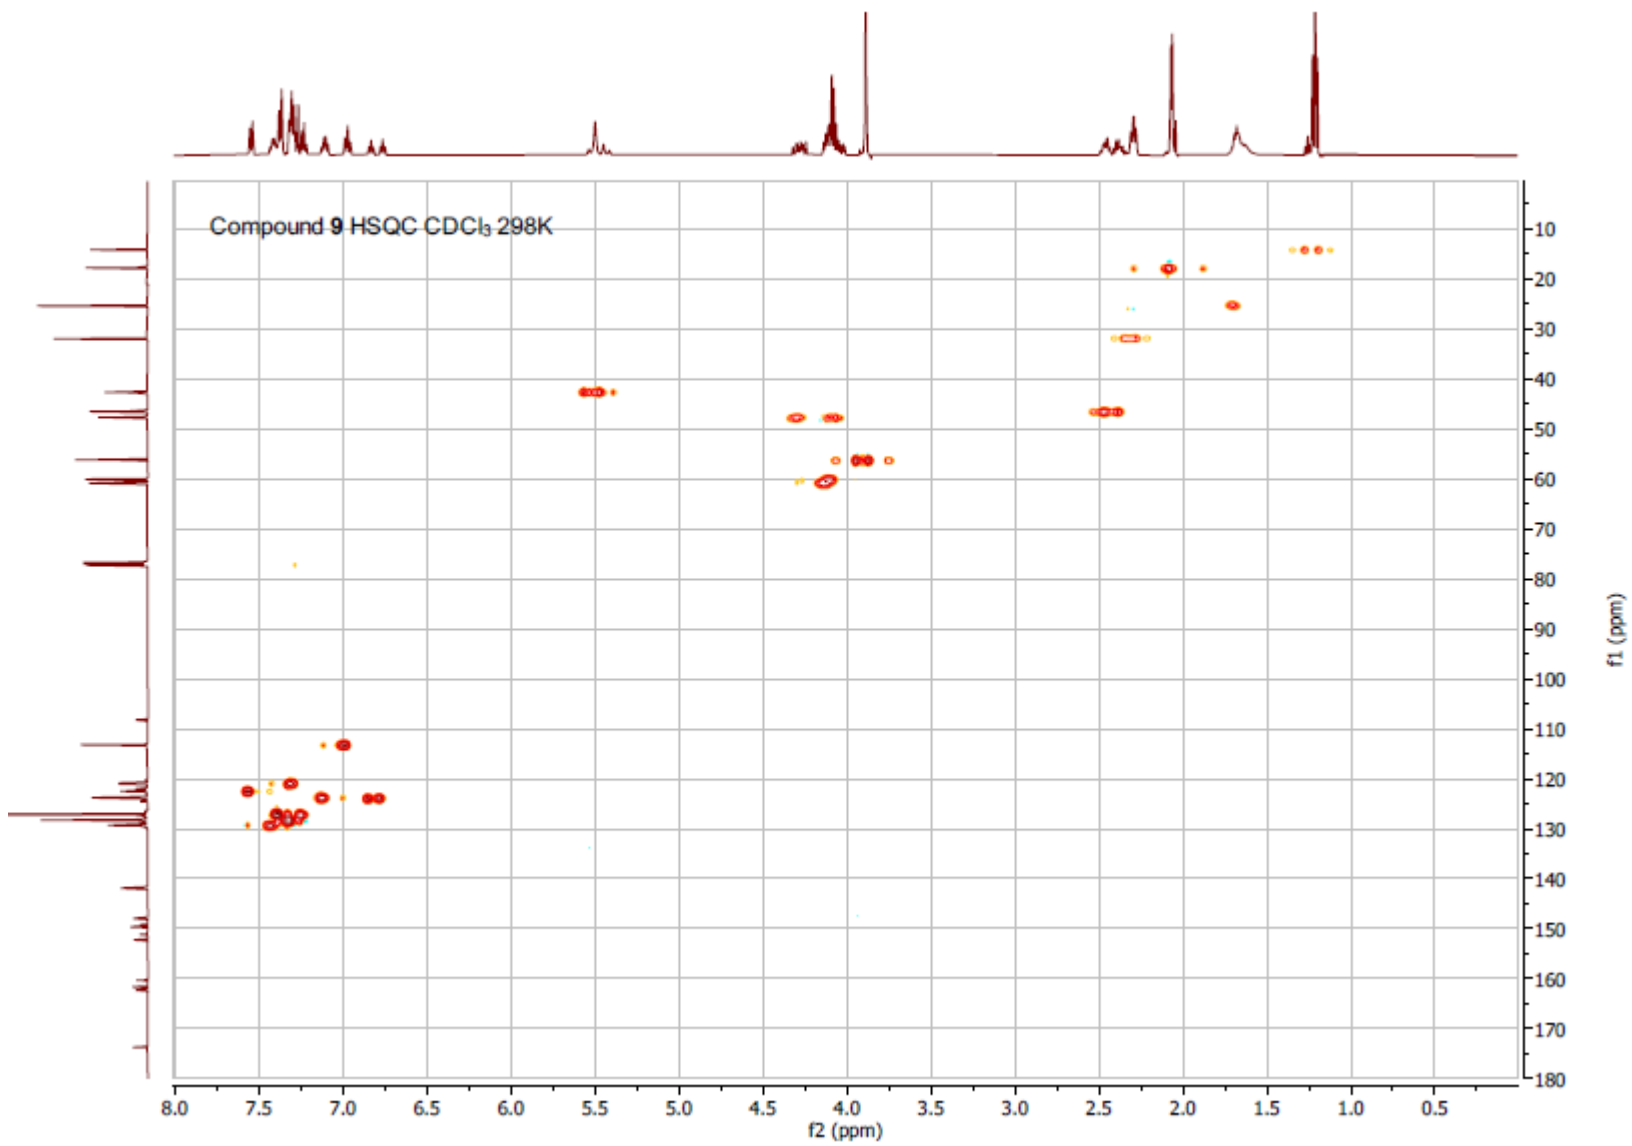

Figure S31.  $^1\text{H}$ - $^{13}\text{C}$  HSQC of compound 9

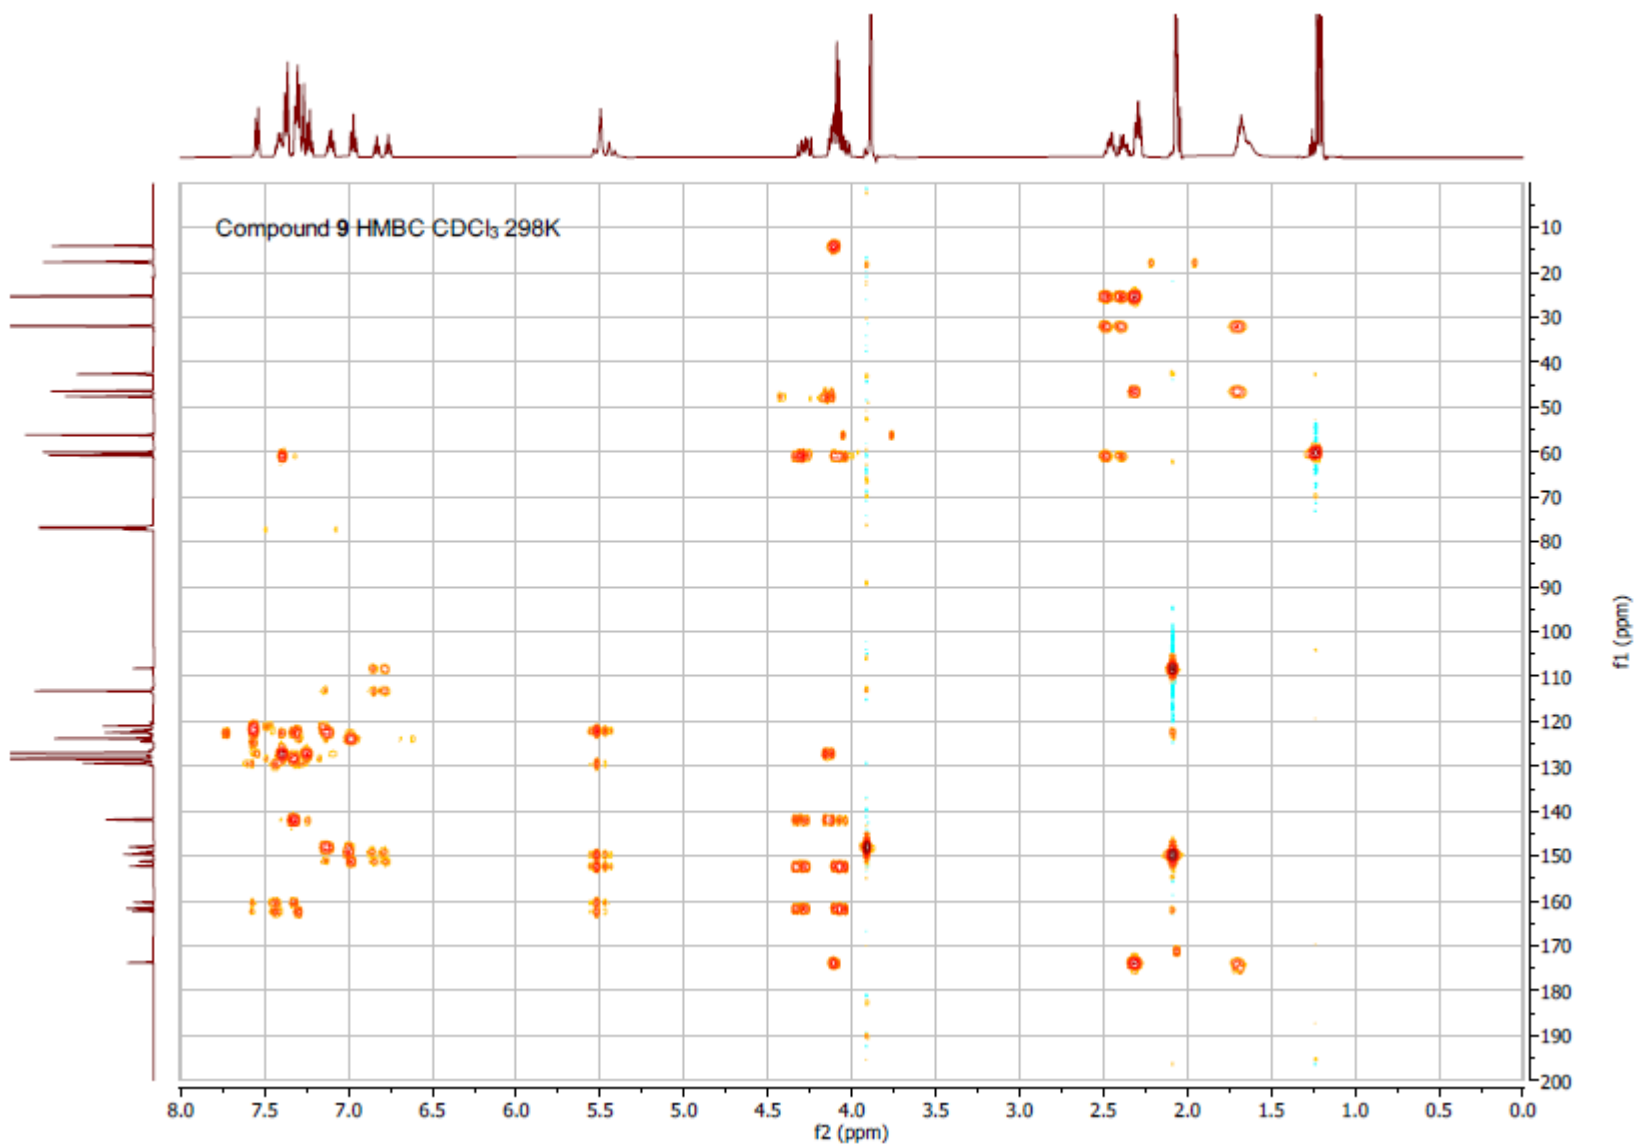

Figure S32. <sup>1</sup>H-<sup>13</sup>C HMBC of compound 9

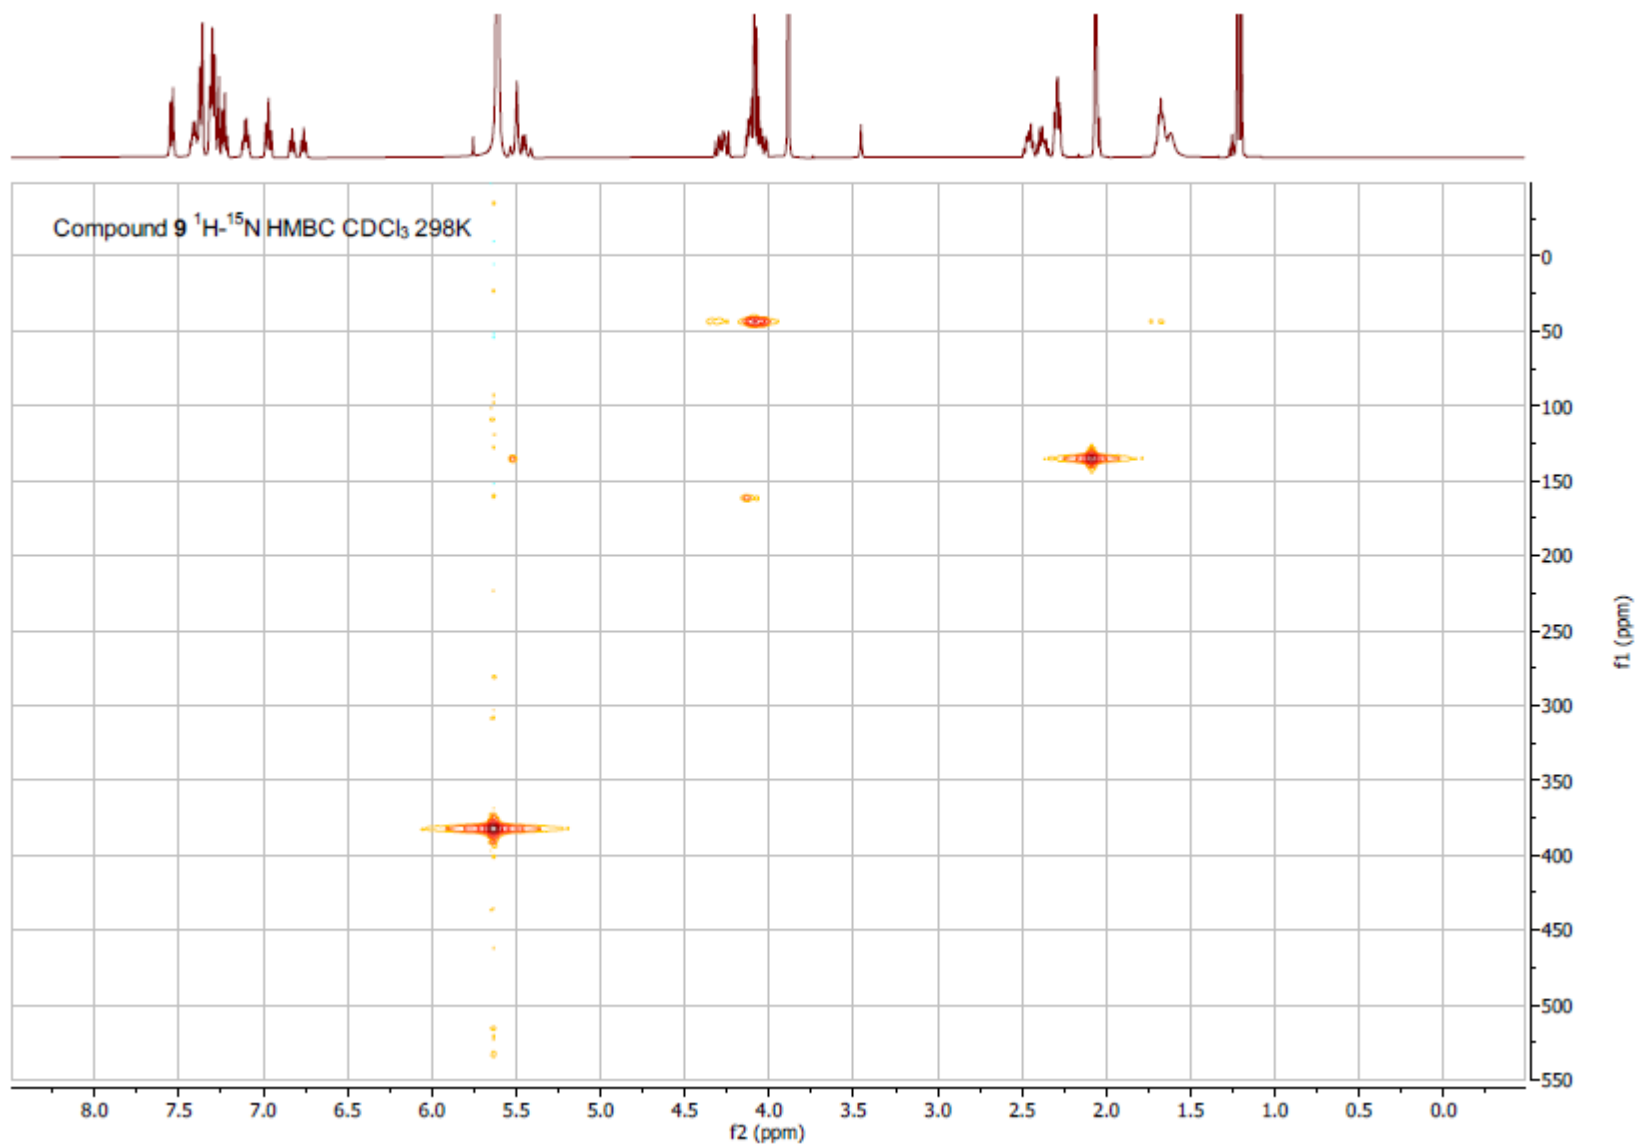

**Figure S33.**  $^1\text{H}$ - $^{15}\text{N}$  HMBC of compound 9

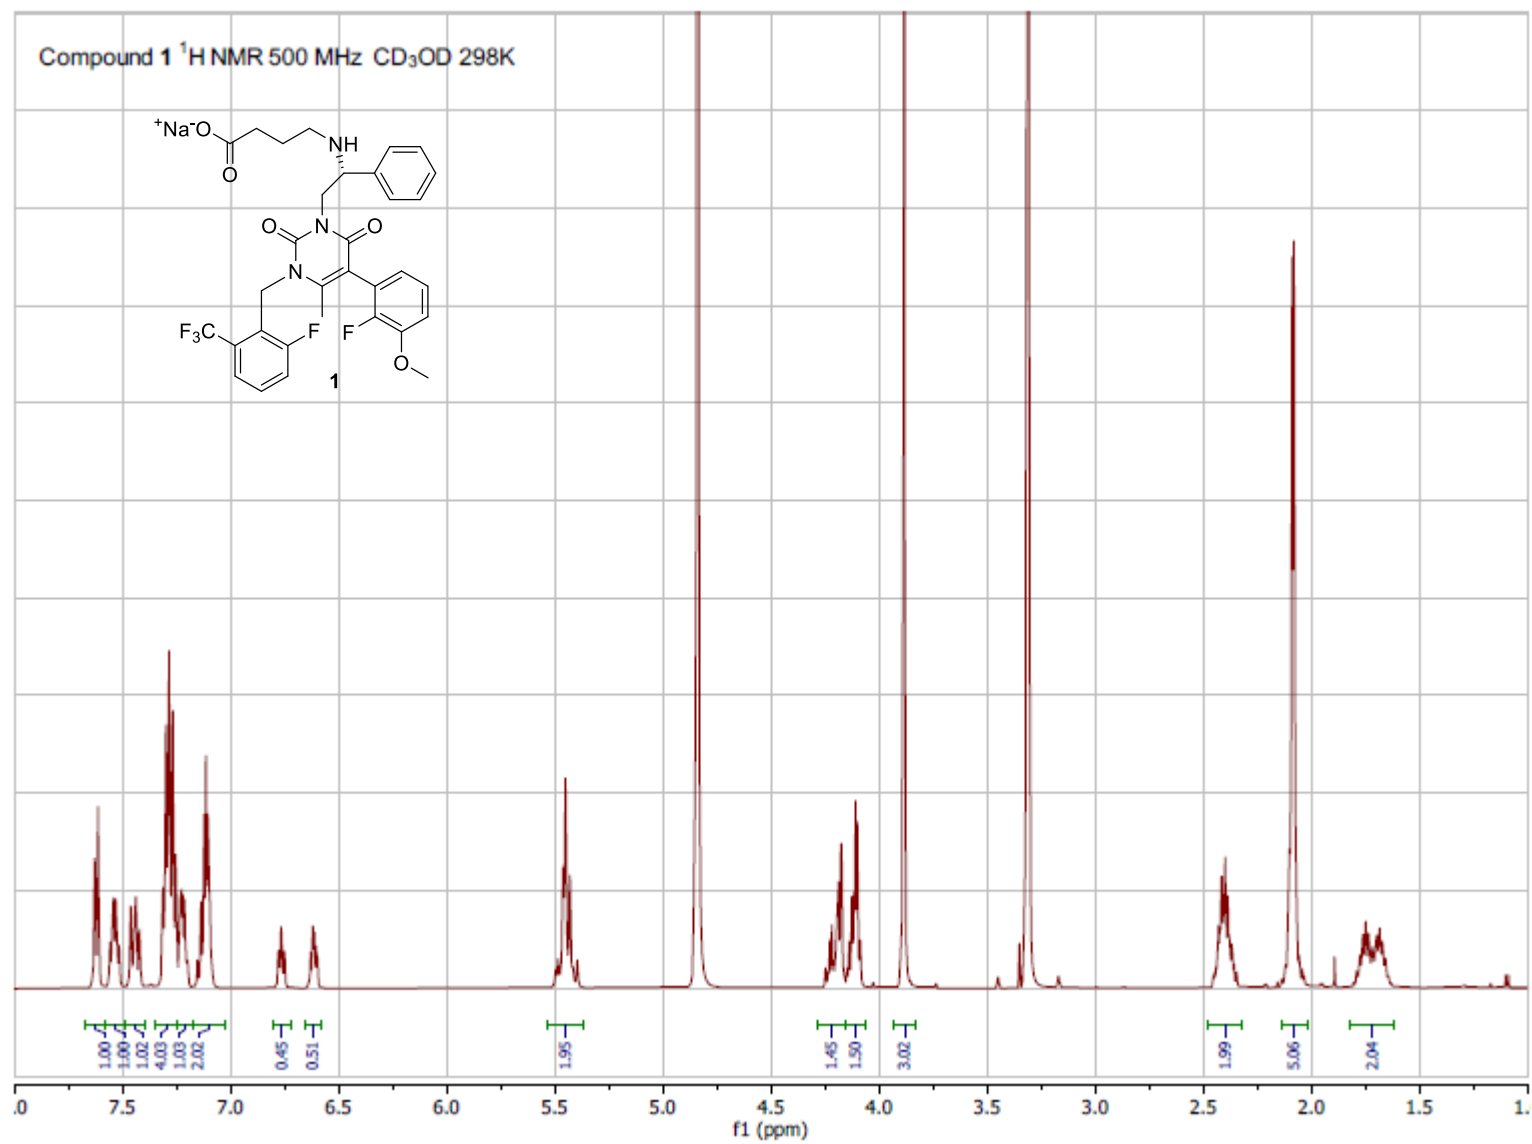

Figure S34.  $^1\text{H}$  NMR of compound 1

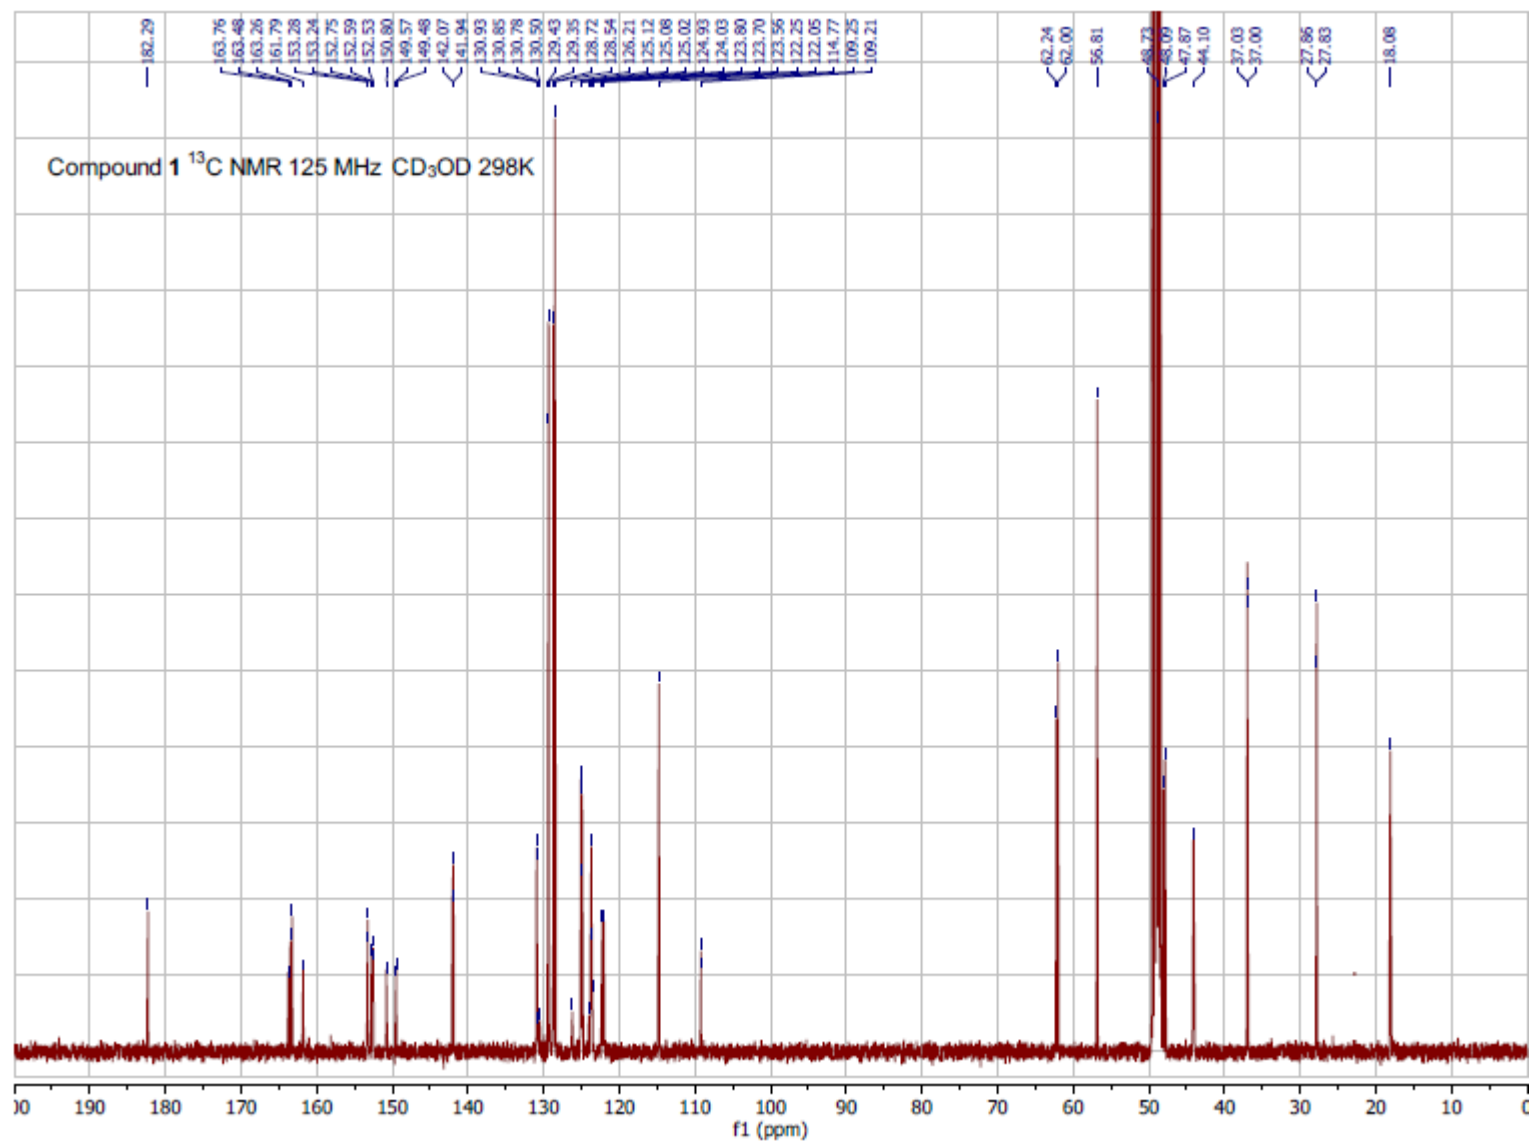

Figure S35.  $^{13}\text{C}$  NMR of compound **1**

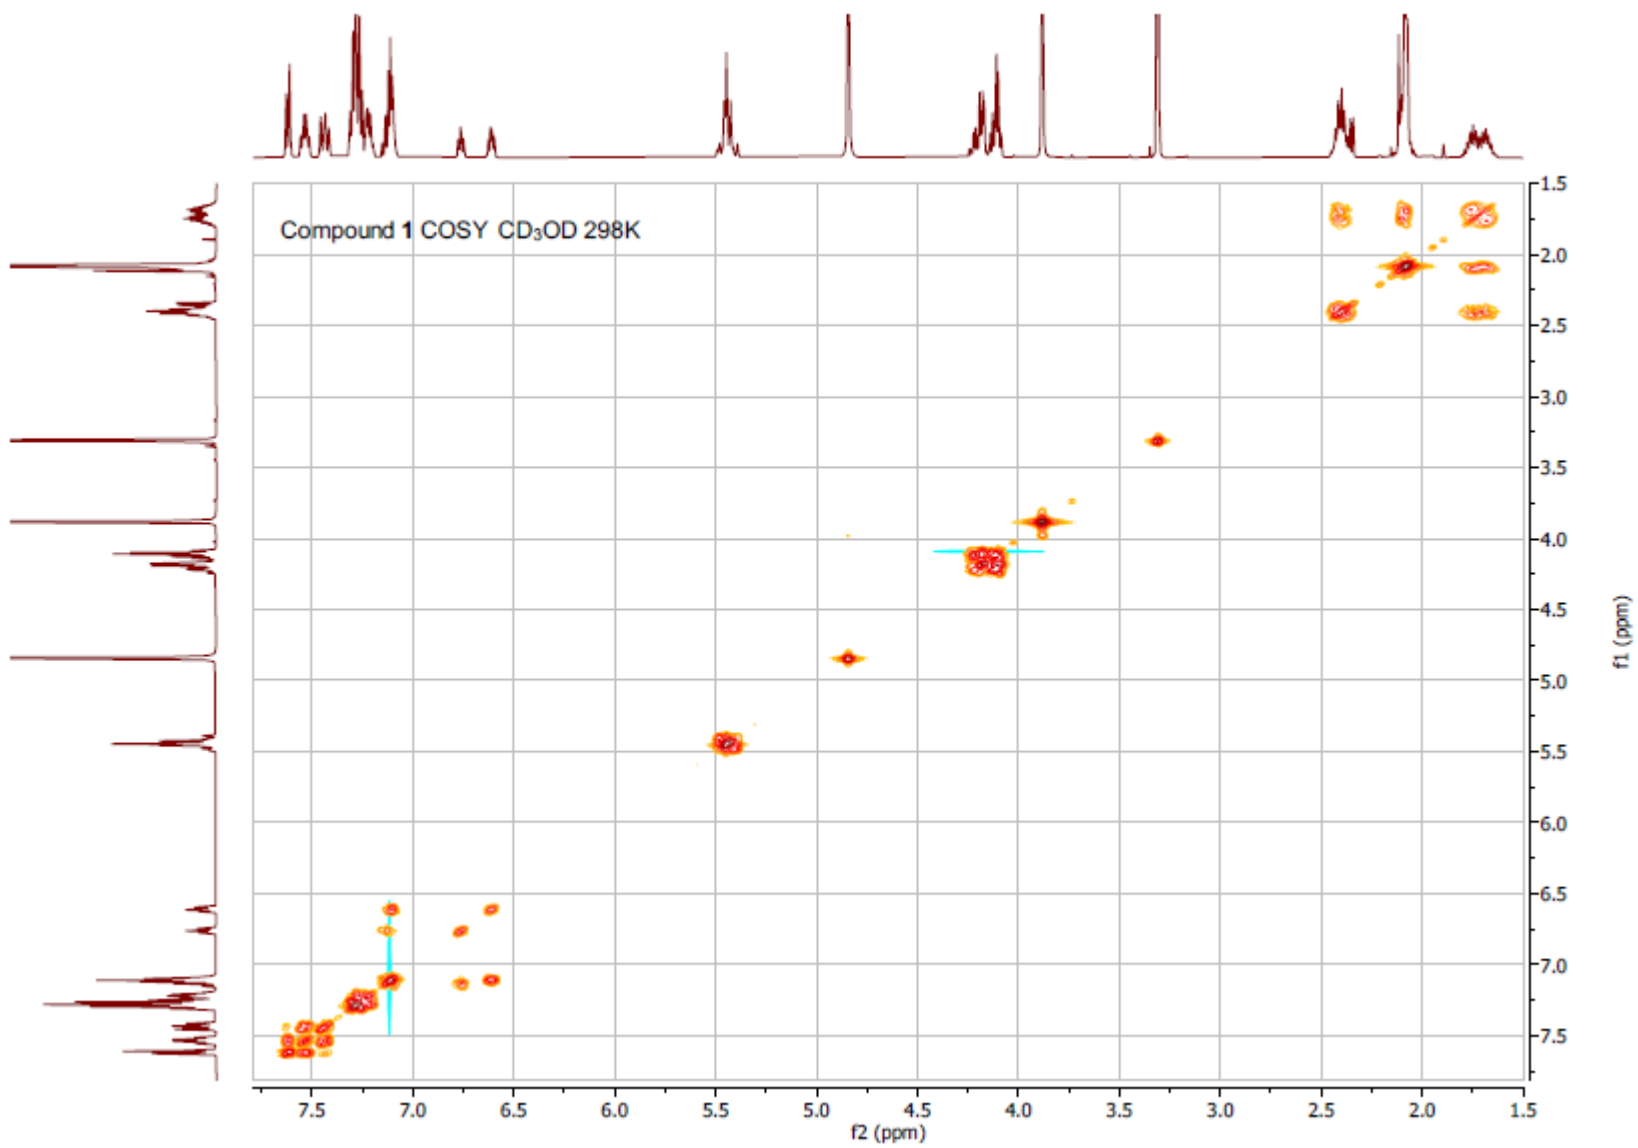

Figure S36. COSY of compound 1

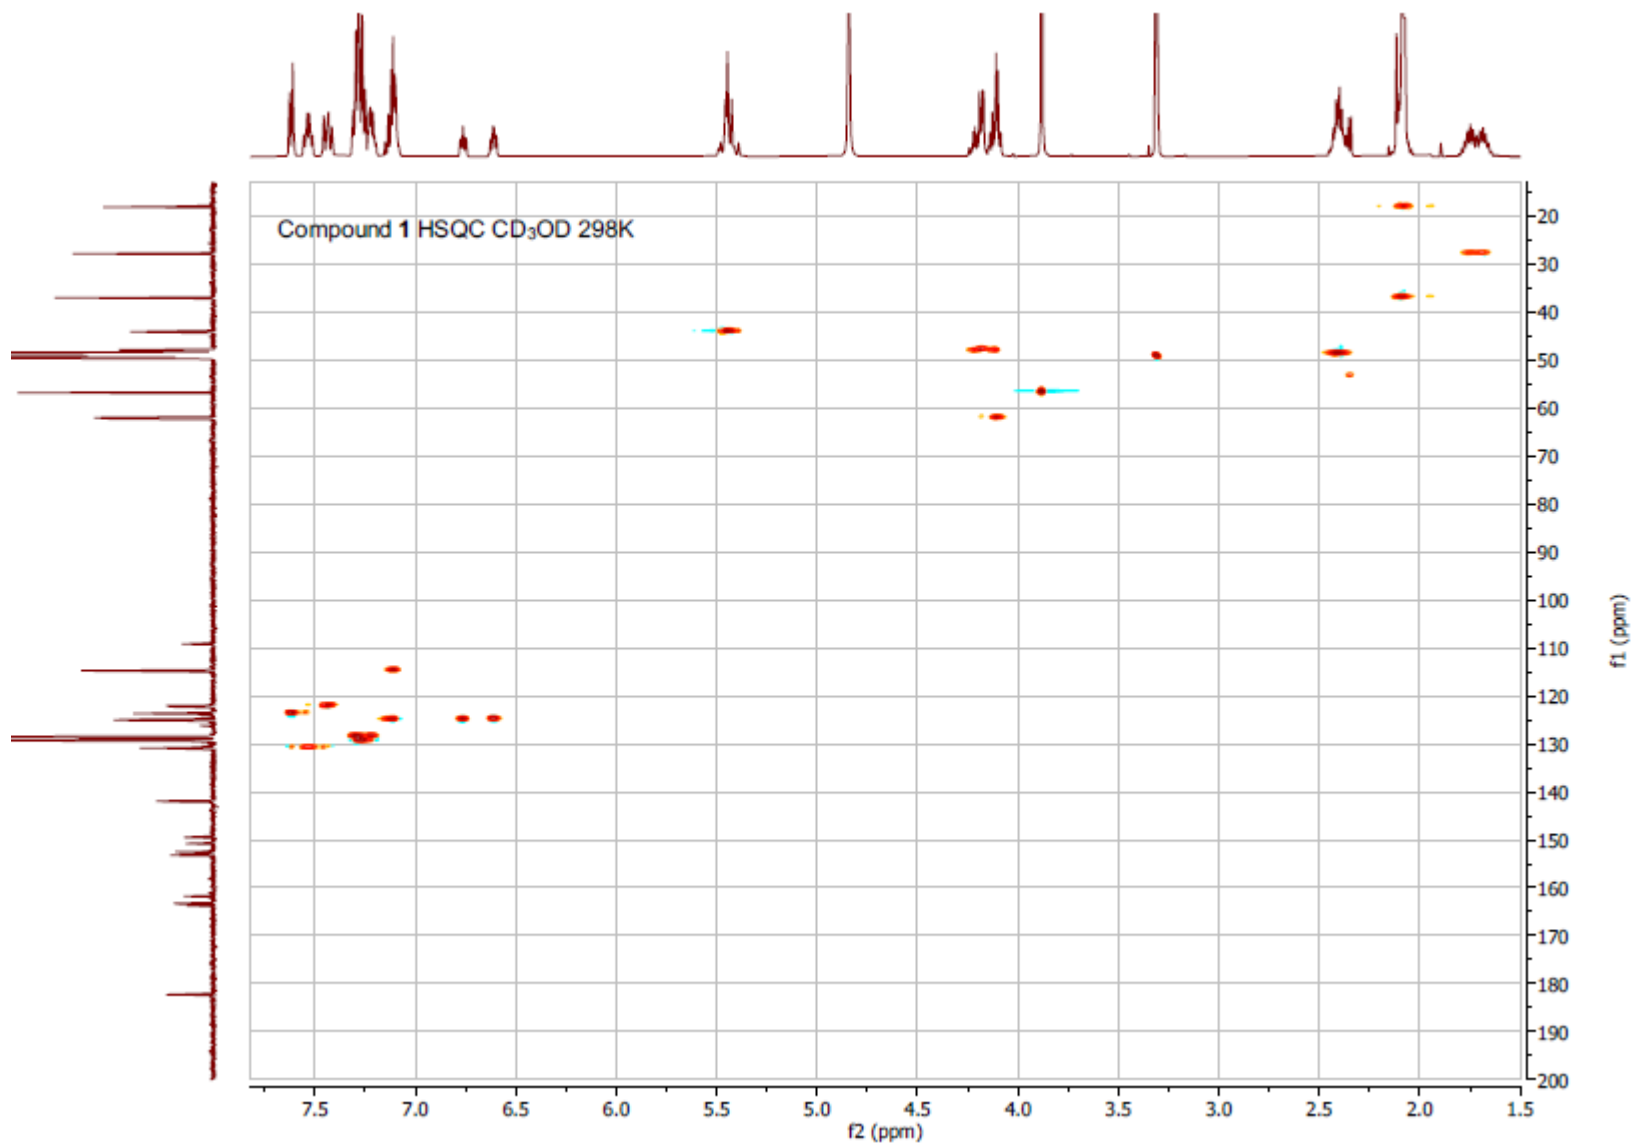

**Figure S37.**  $^1\text{H}$ - $^{13}\text{C}$  HSQC of compound 1

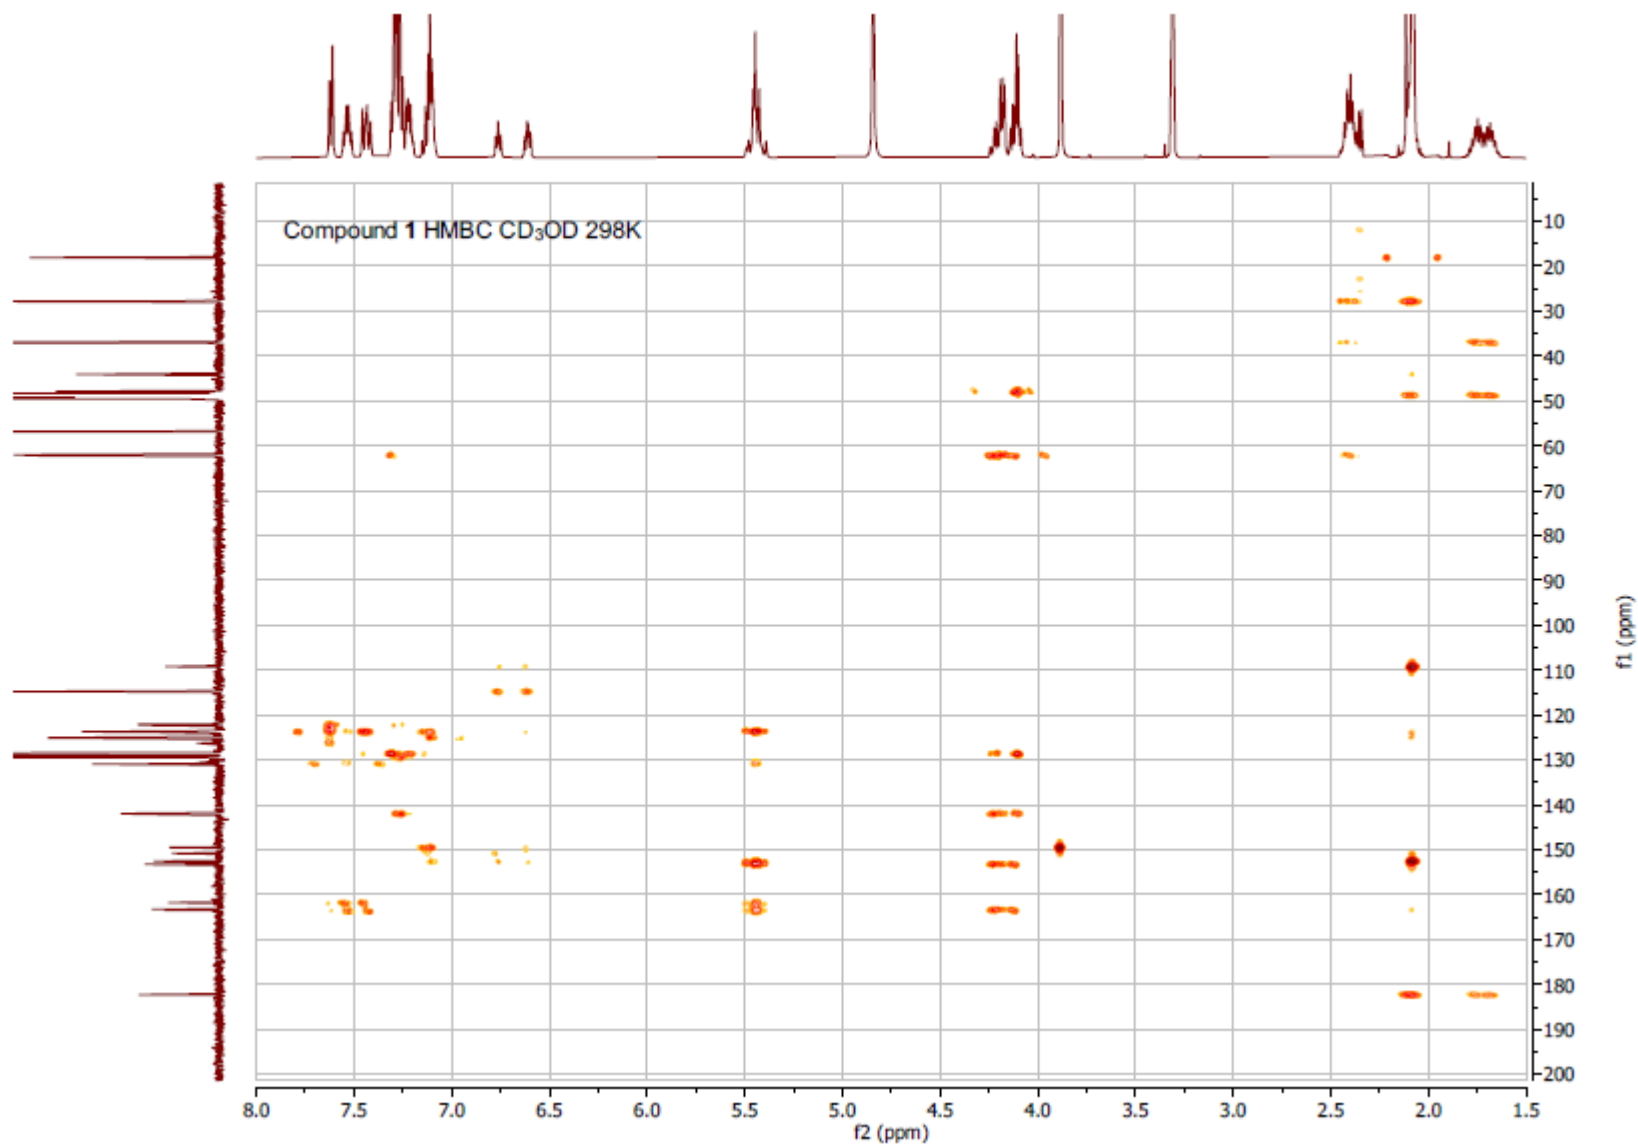

**Figure S38.** <sup>1</sup>H-<sup>13</sup>C HMBC of compound 1



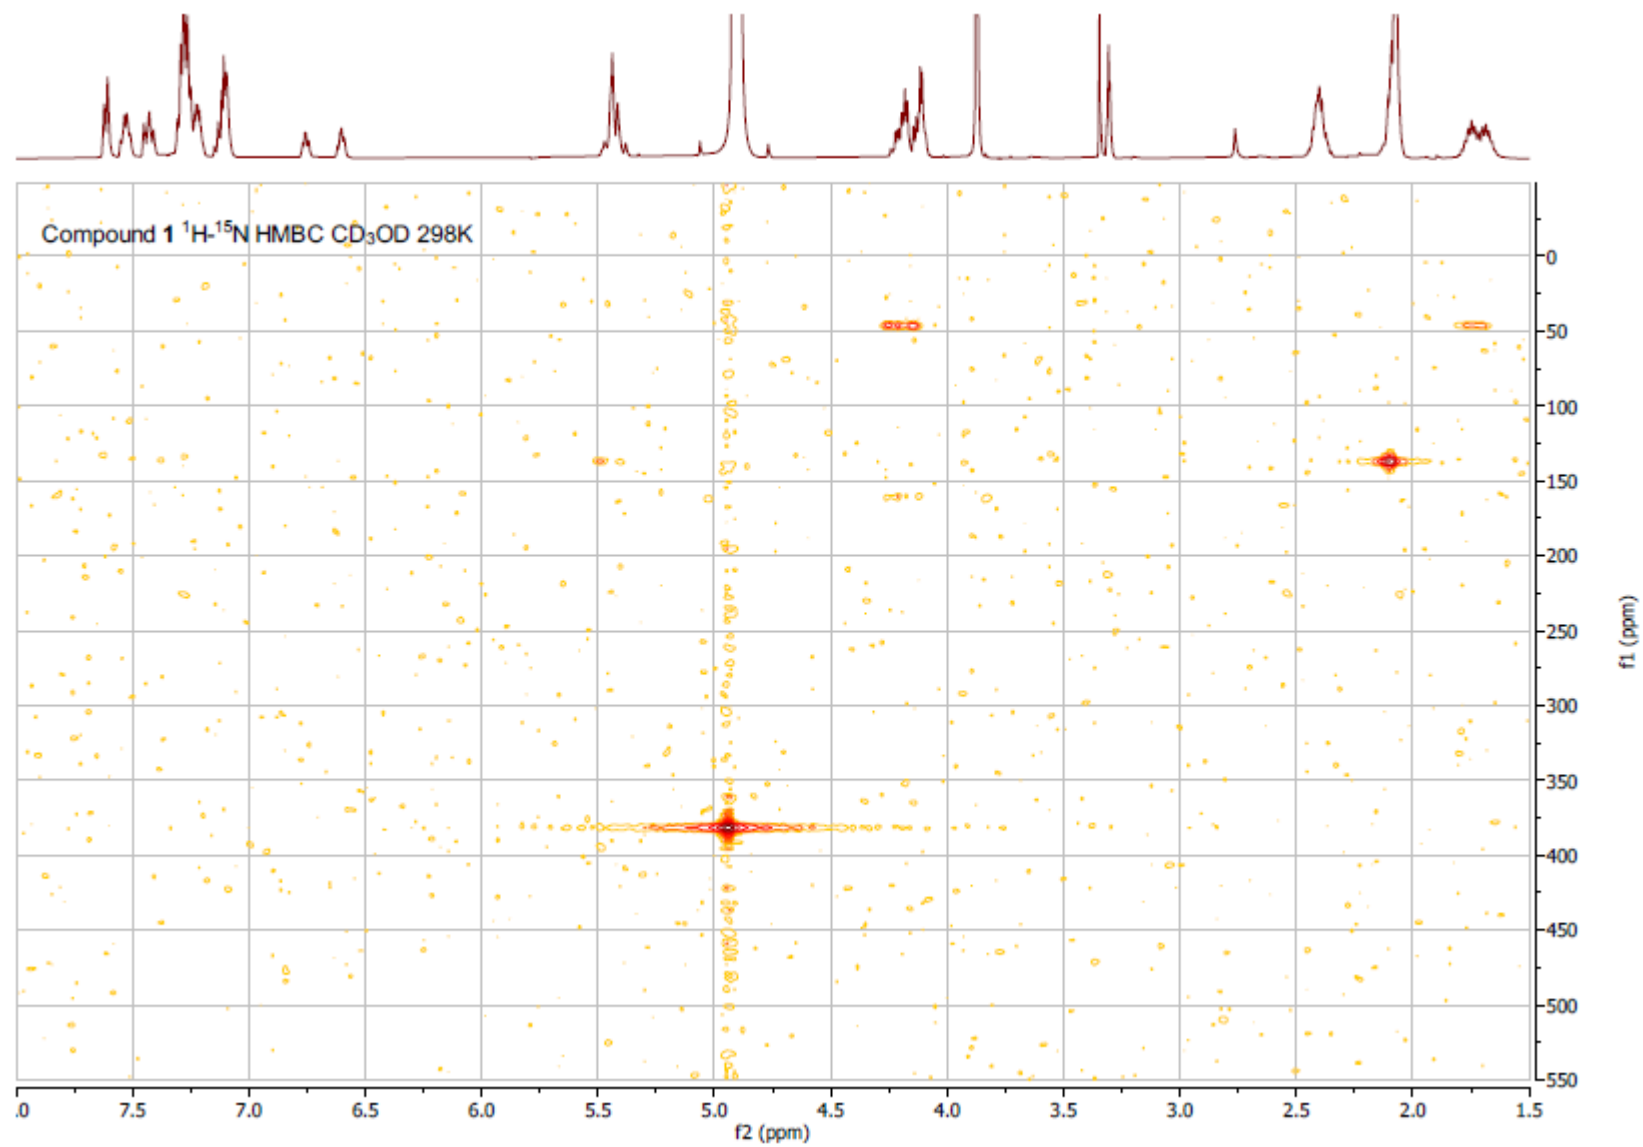

Figure S39.  $^1\text{H}$ - $^{15}\text{N}$  HMBC of compound 1

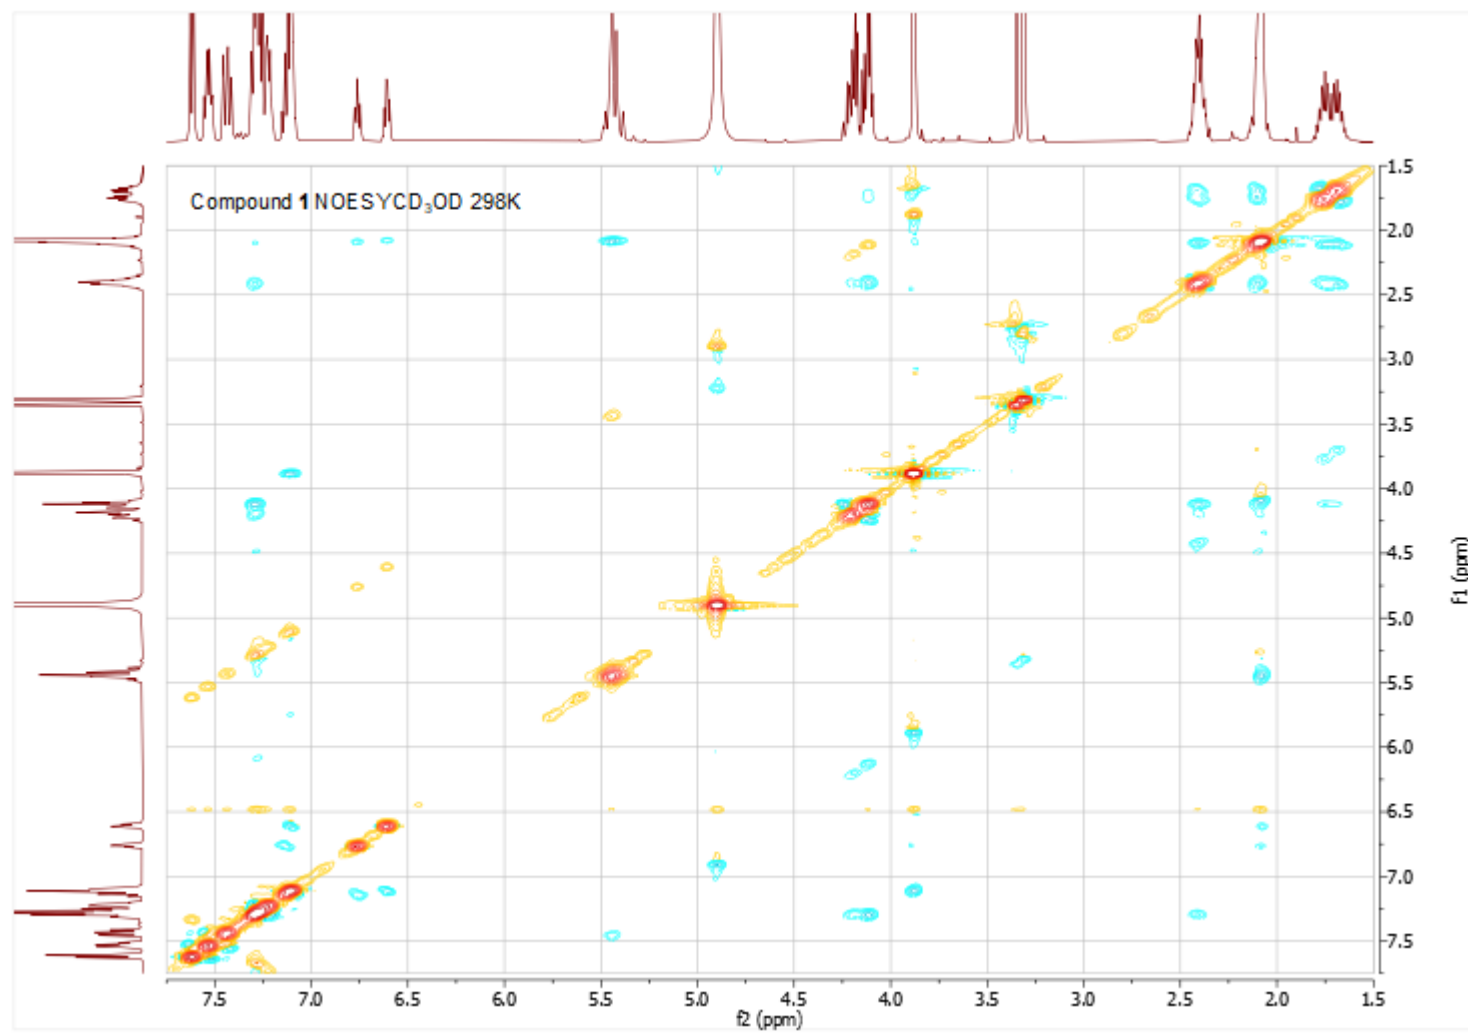

Figure S40. NOESY of compound 1

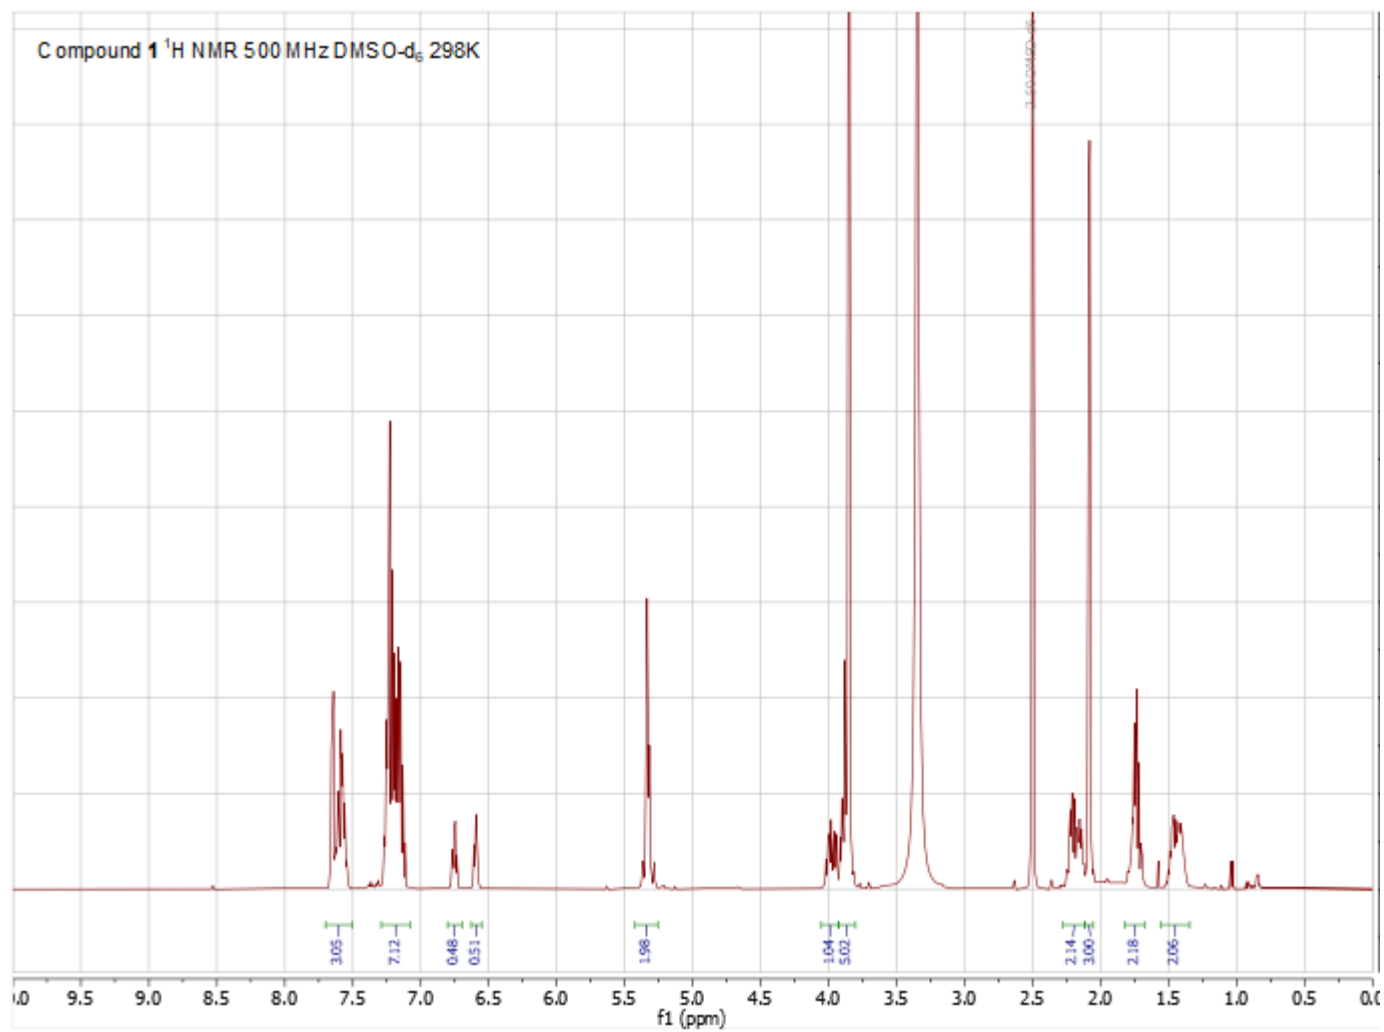

**Figure S41.**  $^1\text{H}$  NMR of compound **1** in DMSO- $\text{d}_6$

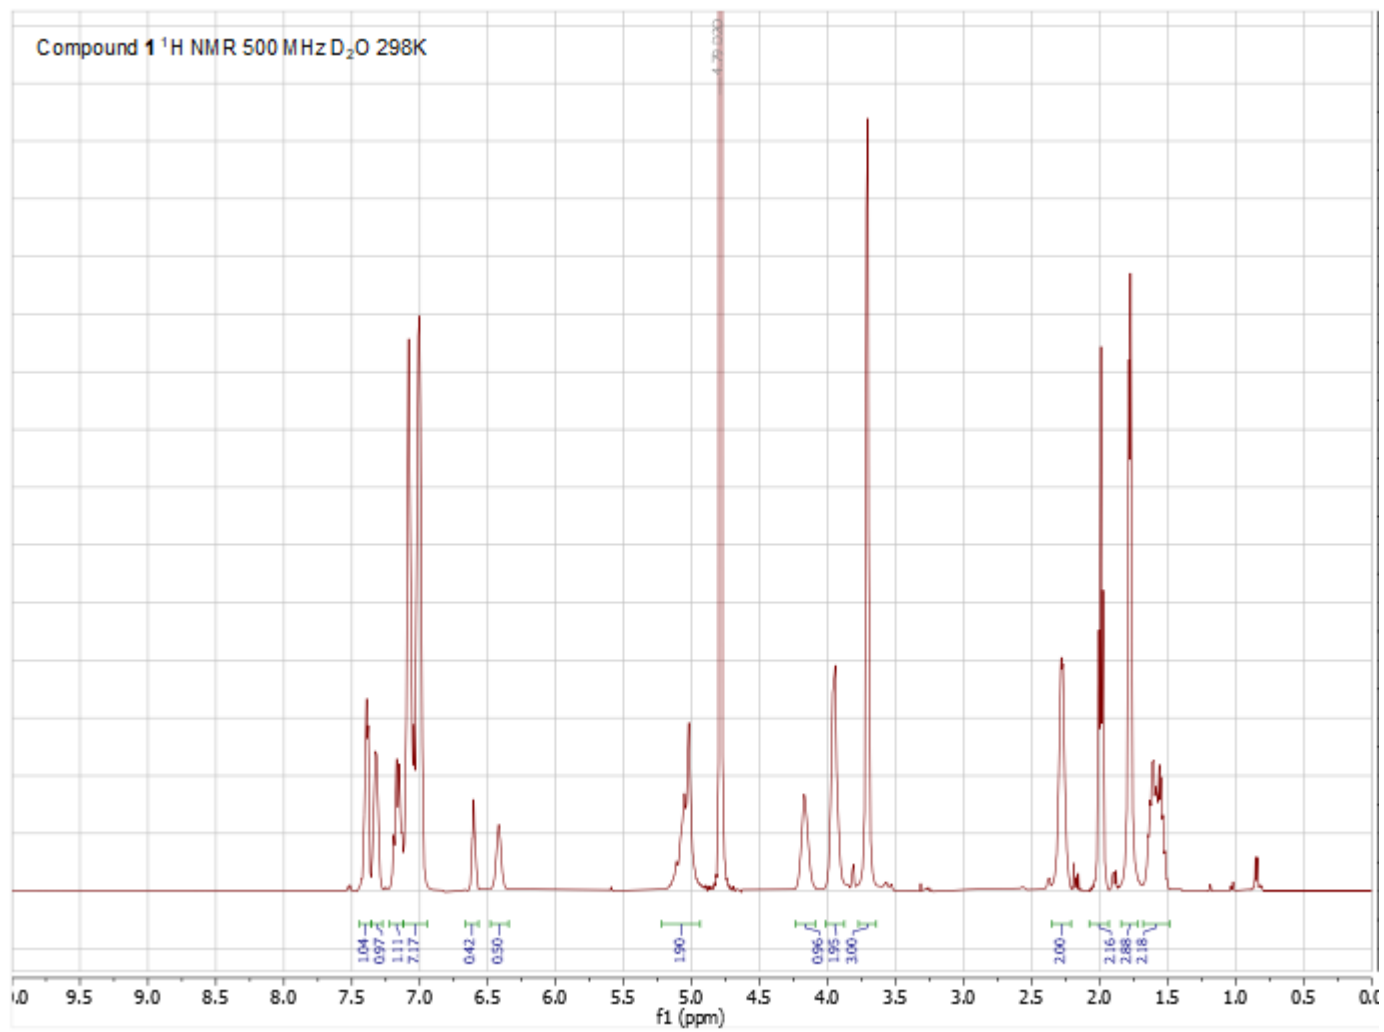

**Figure S42.**  $^1\text{H}$  NMR of compound **1** in  $\text{D}_2\text{O}$

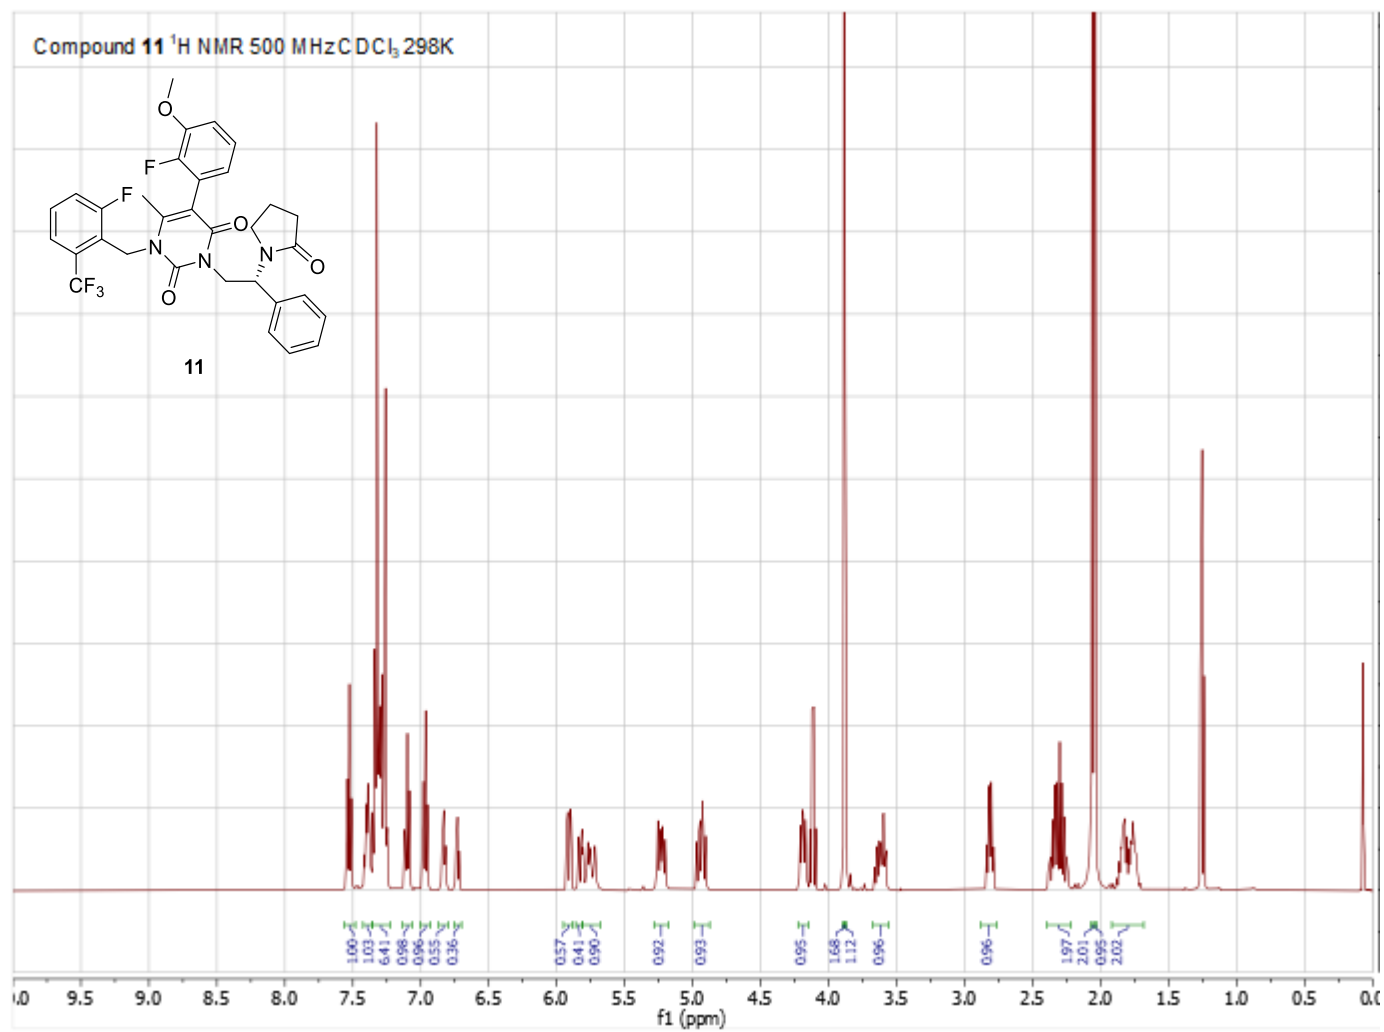

Figure S43.  $^1\text{H}$  NMR of compound **11**

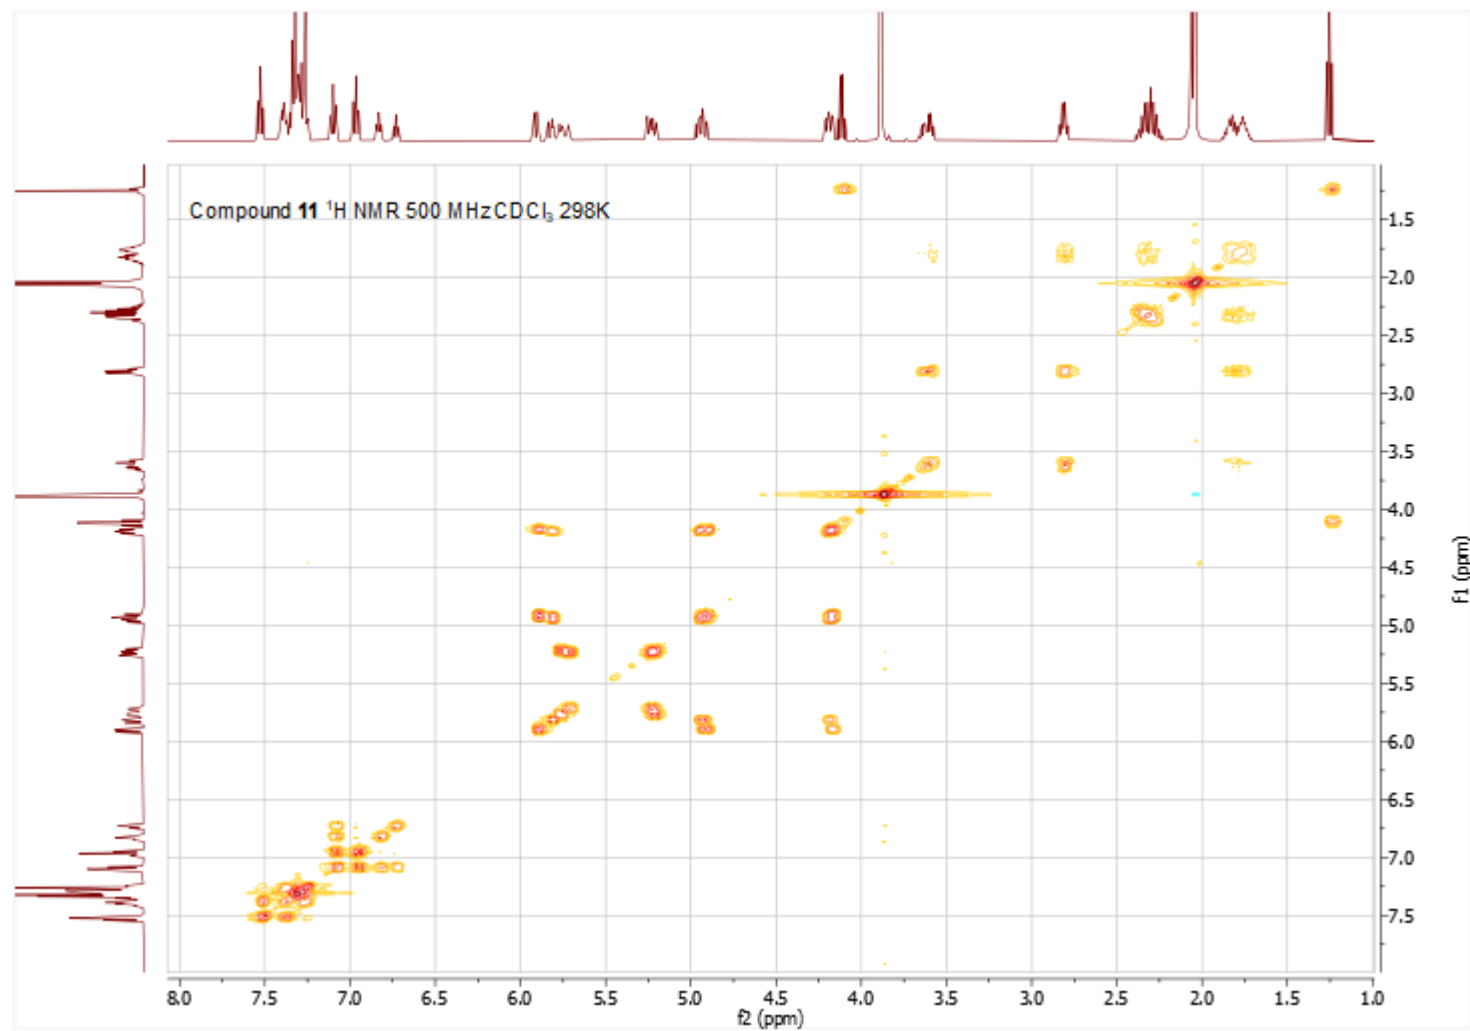

Figure S44. COSY of compound **11**

| Conformers | Water $\Delta E$<br>(kcal/mol) | Water (%) | Methanol $\Delta E$<br>(kcal/mol) | Methanol (%) |
|------------|--------------------------------|-----------|-----------------------------------|--------------|
| <b>1A</b>  | 4.65                           | 0.0       | 4.68                              | 0.0          |
| <b>1C</b>  | 0.84                           | 18.4      | 0.73                              | 21.2         |
| <b>1D</b>  | 4.74                           | 0.0       | 4.72                              | 0.0          |
| <b>1E</b>  | 7.88                           | 0.0       | n.c.                              | n.c.         |
| <b>1H</b>  | 2.54                           | 1.0       | 2.52                              | 1.0          |
| <b>1I</b>  | 2.66                           | 0.9       | 2.64                              | 0.8          |
| <b>1J</b>  | 5.68                           | 0.0       | n.c.                              | n.c.         |
| <b>1K</b>  | 5.42                           | 0.0       | n.c.                              | n.c.         |
| <b>1L</b>  | 4.61                           | 0.0       | 4.58                              | 0.0          |
| <b>1M</b>  | 0.00                           | 75.6      | 0.00                              | 73.0         |
| <b>1O</b>  | 4.22                           | 0.1       | 4.20                              | 0.1          |
| <b>1Q</b>  | 4.45                           | 0.0       | 4.43                              | 0.0          |
| <b>1S</b>  | 1.93                           | 2.9       | 1.92                              | 2.9          |
| <b>1T</b>  | 4.30                           | 0.1       | 4.28                              | 0.1          |
| <b>1U</b>  | 4.59                           | 0.0       | 4.58                              | 0.0          |
| <b>1V</b>  | 4.27                           | 0.1       | 4.32                              | 0.0          |
| <b>1W</b>  | 2.75                           | 0.7       | 2.74                              | 0.7          |

<sup>1</sup>n.c. = not calculated.

**Table S1.** Relative energies and equilibrium percentages of the optimized conformations endowed with  $\Delta E < 5$  kcal/mol in the gas phase, in water and methanol solvent models.

| Internuclear H-21/H-15 distance estimated by 2D NOESY |                                             |                                |                                | Internuclear distances of each H-15 proton from H-21 estimated by conformational analyses <sup>3</sup> |
|-------------------------------------------------------|---------------------------------------------|--------------------------------|--------------------------------|--------------------------------------------------------------------------------------------------------|
| Atropisomer                                           | H-21/H-15 cross peak intensity <sup>1</sup> | H-21/H-20 cross peak intensity | H-21/H15 distance <sup>2</sup> |                                                                                                        |
| 1-aR                                                  | -174489.7                                   | -2699647.4                     | 3.9 Å                          | 3.89 Å - 4.90 Å - 5.30 Å (Average value = 4.70 Å)                                                      |
| 1-aS                                                  | -161152.2                                   | -2364674.9                     | 3.9 Å                          | 3.95 Å - 5.33 Å - 4.91 Å (Average value = 4.73 Å)                                                      |

<sup>1</sup> One-third of the intensity of the cross peak; <sup>2</sup> The following general formula for quantitative distance information by measurement of the cross-peak intensities, within the initial rate approximation, was used:  $r_{H-21/H-20}/r_{H-21/H-15} = (a_{H-21/H-15}/a_{H-21/H-20})^{1/6}$ ;  $r$  = internuclear distance,  $a$  = intensity (volume). The internuclear distance between the aromatic protons H-21 and H-20 was fixed to 2.47 Å as reported in *Journal of Molecular Liquids* **2022**, 367,120481. <sup>3</sup> see experimental section of the manuscript.

**Table S2.** Internuclear H-15/H-21 distance estimated by 2D NOESY experiment.
